1 **At least seven distinct rotavirus genotype constellations in bats with evidence of**  
2 **reassortment and zoonotic transmissions**

3  
4 Ceren Simsek<sup>a</sup>; Victor Max Corman<sup>b,o</sup>; Hermann Ulrich Everling<sup>c</sup>; Alexander N.  
5 Lukashev<sup>d</sup>; Andrea Rasche<sup>b,o</sup>; Gael Darren Maganga<sup>e,f</sup>; Tabea Binger<sup>i</sup>; Daan Jansen<sup>a</sup>;  
6 Leen Beller<sup>a</sup>; Ward Deboutte<sup>a</sup>; Florian Gloza-Rausch<sup>g</sup>; Antje Seebens-Hoyer<sup>g</sup>; Stoian  
7 Yordanov<sup>h</sup>; Augustina Sylverken<sup>ij</sup>; Samuel Oppong<sup>j</sup>; Yaw Adu Sarkodie<sup>j</sup>; Peter Vallo<sup>k</sup>;  
8 Eric M. Leroy<sup>l</sup>; Mathieu Bourgarel<sup>m,n</sup>; Kwe Claude Yinda<sup>a\*</sup>; Marc Van Ranst<sup>a</sup>; Christian  
9 Drosten<sup>b,o</sup>; Jan Felix Drexler<sup>b,o#</sup>; Jelle Matthijnsens<sup>a#</sup>

10  
11 <sup>a</sup> KU Leuven - University of Leuven, Department of Microbiology, Immunology and  
12 Transplantation, Rega Institute for Medical Research, Leuven, Belgium

13 <sup>b</sup> Charité-Universitätsmedizin Berlin, corporate member  
14 of Freie Universität Berlin, Humbolt-Universität zu Berlin and Berlin Institute of Health,  
15 Institute of Virology, 10117 Berlin, Germany

16 <sup>c</sup> Institute of Virology, University of Bonn Medical Centre, Bonn, Germany

17 <sup>d</sup> Sechenov University, Moscow, Russia

18 <sup>e</sup> Centre International de Recherches Médicales de Franceville, Franceville, Gabon

19 <sup>f</sup> Université des Sciences et Technique de Masuku, Institut National d'Agronomie et de  
20 Biotechnologies, Franceville, Gabon

21 <sup>g</sup> Noctalis, Centre for Bat Protection and Information, Bad Segeberg, Germany

22 <sup>h</sup> Forestry Board Directorate of Strandja Natural Park, Malko Tarnovo, Bulgaria

23 <sup>i</sup> Kumasi Centre for Collaborative Research in Tropical Medicine (KCCR), Kumasi,  
24 Ghana

25 <sup>j</sup> Kwame Nkrumah University of Science and Technology, Kumasi, Ghana

26 <sup>k</sup> Institute of Vertebrate Biology, Academy of Sciences of the Czech Republic, v.v.i.,

27 Brno

28 <sup>l</sup> Institut de Recherche pour le Développement, UMR 224 (MIVEGEC),

29 IRD/CNRS/Montpellier University, Montpellier, France

30 <sup>m</sup> CIRAD, UMR ASTRE, Harare, Zimbabwe

31 <sup>n</sup> ASTRE, Montpellier University, CIRAD, INRA, Montpellier, France

32 <sup>o</sup> German Centre for Infection Research (DZIF), associated partner Charité

33 Universitätsmedizin Berlin, 10117 Berlin, Germany

34

35 **Running title:** Genetic diversity of bat rotaviruses

36

37 #Address correspondence to Jelle Matthijnssens, [jelle.matthijnssens@kuleuven.be](mailto:jelle.matthijnssens@kuleuven.be); Jan

38 [Felix Drexler: felix.drexler@charite.de](mailto:Felix Drexler: felix.drexler@charite.de)

39

40 Ceren Simsek, Victor Max Corman and Hermann Ulrich Everling contributed equally to

41 this work. Author order was determined on mutual agreement.

42

43 \*Present address: Laboratory of Virology, Rocky Mountain Laboratories, Division of

44 Intramural Research, National Institute of Allergy and Infectious Diseases, National

45 Institutes of Health, Hamilton, Montana, USA

46

47 Abstract: 250 words

48 Text: 5114 words

49 **ABSTRACT**

50 Bats host many viruses pathogenic to humans, and increasing evidence suggests that  
51 Rotavirus A (RVA) also belongs to this list. Rotaviruses cause diarrheal disease in many  
52 mammals and birds, and their segmented genomes allow them to reassort and increase  
53 their genetic diversity. Eighteen out of 2,142 bat faecal samples (0.8%) collected from  
54 Europe, South America and Africa were PCR-positive for RVA and 11 of those were fully  
55 characterized using viral metagenomics. Upon contrasting their genomes with publicly  
56 available data, at least 7 distinct bat RVA genotype constellations were identified,  
57 including evidence of reassortments among them. Some of these constellations are  
58 spread across the world, whereas others appear to be geographically restricted. Our  
59 analyses also provide evidence for multiple zoonotic transfer events involving bat RVAs.  
60 A Bulgarian bat RVAs possessed a genotype constellation previously identified in Chinese  
61 bats, and identical to a rare Argentinean horse RVA. A Costa Rican bat RVA possessed  
62 3 previously undescribed gene segments and clustered closely with a human strain.  
63 Although SA11 is one of the most widely used reference strains for RVA research and  
64 forms the backbone of a reverse genetics system, its origin remained enigmatic.  
65 Remarkably, the majority of the gene segments of SA11 were closely related to Gabonese  
66 bat RVAs, suggesting a potential bat origin. Overall, our findings suggest an  
67 underexplored genetic diversity of RVAs in bats which is likely the tip of the iceberg.  
68 Increasing contact between humans and bat wildlife will further increase the zoonosis risk,  
69 which warrants closer attention to these viruses.

70

71 **Importance**

72 The increased research on bat coronaviruses after SARS-CoV and MERS-CoV, allowed  
73 the very rapid identification of SARS-CoV-2. This is an excellent example of the  
74 importance of knowing viruses harboured by wildlife in general and bats in particular, for  
75 global preparedness against emerging viral pathogens. The current effort to characterise  
76 bat rotavirus strains from 3 continents provided evidence that several atypical rotaviruses  
77 in humans and animals might have a bat origin, implying that zoonoses of bat rotaviruses  
78 occur more frequently than currently realized.

79  
80 **Keywords:** Viral metagenomics, bat rotavirus, rotavirus genetic diversity, SA11, zoonosis

81  
82 **Author Contributions**

83 C.D, J.F.D, J.M and M.V.R designed the research; V.M.C., H.U.E., A.N.L., A.R., G.D.M.,  
84 T.B., F.G.R., A.SH., S.Y., A.S, S.O., Y.A.S., P.V., M.B. and E.M.L. were involved in  
85 sample collection; V.M.C., H.U.E., A.N.L. and C.S. performed the research; C.S., D.J.,  
86 L.B., W.D., H.U.E., V.M.C. and K.C.Y. contributed in data analysis; J.F.D., C.D., C.S. and  
87 J.M. drafted the paper; final version was approved by all co-authors.

88

## 89 INTRODUCTION

90 Rotaviruses are the leading cause of diarrheal disease in the young of mammals and  
91 birds. In humans, rotaviruses are responsible for 122,000-216,000 deaths in under 5-year  
92 old infants on a yearly basis, mainly in developing countries (1). The *Rotavirus* genus  
93 belongs to the family *Reoviridae* and contains 9 species designated as A-I (RVA-RVI).  
94 The rotavirus genome consists of 11 dsRNA segments encoding 6 structural viral proteins  
95 (VP1-6) and 6 non-structural proteins (NSP1-6) (2).

96 The RVA outer capsid antigens, VP4 and VP7 are used for a dual classification system  
97 defining P-genotype (VP4 is Protease sensitive) and G-genotype (VP7 is Glycosylated),  
98 respectively (2). However, as gene reassortment is a common phenomenon for viruses  
99 with a segmented genome after co-infection, a more comprehensive classification  
100 approach became necessary to better account for the genome evolution and genetic  
101 diversity of RVAs. In 2008, a nucleotide sequence-based, complete genome classification  
102 system was developed for RVA, define genotypes for each of the 11 gene segment. These  
103 genotypes allowed extending the dual classification to full 'genotype constellations'  
104 classification (3, 4). The gene assignments are reported as Gx-P[x]-Ix-Rx-Cx-Mx-Ax-Nx-  
105 Tx-Ex-Hx, where 'x' denotes the particular genotype. The Rotavirus Classification Working  
106 Group (RCWG) was formed in order to assign new genotypes to rotavirus genes which  
107 could not be assigned to an established genotype (5). A web-based RotaC tool that uses  
108 the pre-set nucleotide cut-off values was also developed for automated genotype  
109 assignment (6).

110 Accumulating whole genome sequencing data demonstrate that there are typical  
111 genotype constellations present in most animal species. Two of them, Wa-like and DS-1-  
112 like, are responsible for most of the human disease and designated as I1-R1-C1-M1-A1-

113 N1-T1-E1-H1 and I2-R2-C2-M2-A2-N2-T2-E2-H2, respectively, for the non-G/P  
114 genotypes (3). Furthermore, various animal species are known to have specific genotype  
115 constellations such as I2-R2-C2-M2-A3/A11/A13-N2-T6-E2-H3 for cattle and other even-  
116 toed ungulates (7), I1/I5-R1-M1-A1/A8-N1-T1/T7-E1-H1 for swine (3, 8), I2/I6-R2-C2-M3-  
117 A10-N2-T3-E2/E12-H7 for horses (9), and I3-R3-C3-M3-A3/A9-N2-T3-E3-H3/H6 for cats  
118 and dogs (10). Partially shared genotype patterns between established genotype  
119 constellations, such as Wa-like human RVA strains and porcine RVAs, as well as DS-1-  
120 like human RVA strains and bovine RVAs, suggest a common origin and important  
121 zoonotic transfer events in the past (3).

122 Bats belong to the Chiroptera order, which is the second largest order of mammals (11).  
123 They harbour a high diversity of viruses, among them are also zoonotic viruses such as  
124 lyssavirus, Hendra and Nipah viruses, filovirus and several coronaviruses (12–18). These  
125 viruses can be transmitted to humans via saliva, infected tissues, faeces and direct  
126 contact (19). Given their great population densities, migration ability and proximity to  
127 human habitats; bats are often screened for emerging and re-emerging viral pathogens  
128 (20, 21). Such screenings have resulted in the sporadic identification of rotavirus strains  
129 in bats in the last decade. Even though there are reports of RVH in South Korean bats in  
130 2016 (22) and Cameroonian bats in 2018 (23), and a novel rotavirus species (tentatively  
131 named RVJ) was identified from Schreiber's bats in Serbia in 2014 (24); RVA is the most  
132 commonly detected species and there are currently more than 20 bat RVA strains  
133 identified in literature. In 2010, Esona and colleagues reported the first partially sequenced  
134 RVA strain (KE4852) in a Kenyan *Eidolon helvum* (straw-coloured fruit bat), and the  
135 majority of retrieved gene segments were only distantly related to known mammalian RVA  
136 strains, representing novel genotypes (25). During the subsequent decade, sporadic and

137 scattered reports have been published about RVA strains in bats collected from serum,  
138 gut and faecal samples in insectivorous and fruit bats. Several reports of bat RVA strains  
139 came from Chinese studies (26–29), but bat RVAs were also detected and (partially)  
140 characterized from France (30), Brazil (31), Zambia (32, 33), Cameroon (34), Kenya (35)  
141 and Saudi-Arabia (36). These studies investigate samples from a variety of different bat  
142 species such as *Rhinolophus hipposideros* (lesser horseshoe bat) (26), *Aselliscus*  
143 *stoliczkanus* (Stoliczka's trident bat) (27), *Myotis mystacinus* (whiskered bat) (30),  
144 *Molossus molossus* (velvety free-tailed bat), *Glossophaga soricina* (Pallas's long-tongued  
145 bat) (31), *Rhinolophus simulator* (Bushveld horseshoe bat) (32), *Hipposideros pomona*  
146 (Pomona roundleaf bat), *Taphozous melanopogon* (black-bearded tomb bat), *Scotophilus*  
147 *kuhlii* (lesser Asiatic yellow bat), *Rousettus leschenaultii* (Fulvous fruit bat) (28),  
148 *Taphozous mauritanus* (Mauritian tomb bat) (35), *Rousettus aegyptiacus* (Egyptian fruit  
149 bat) (33, 35), *Taphozous perforatus* (Egyptian tomb bat), *Rhinopoma hardwickii* (lesser  
150 mouse-tailed bat) (36) and *Eidolon helvum* (25, 33, 34, 36). From some of these novel bat  
151 RVA strains a few gene segments were sequenced, whereas other strains were  
152 sequenced completely, often resulting in one or multiple novel genotypes (25, 28, 31, 33,  
153 34).

154 Even though RVAs are generally considered to have a rather restricted host range, a  
155 number of unusual strains have been described in literature, suggestive of interspecies  
156 transmissions involving bat RVA strains. One example is the E3198 strain that was  
157 isolated from a diarrheic foal in Argentina in 2008 (37). Although its genotype constellation  
158 was distantly related to feline/canine-like RVA strains at that time, 2 more recent  
159 publications showed a closer relationship with Chinese bat RVA strains in several gene  
160 segments (26, 27). A second example was the unusual human G3P[3] RVA strain 12638,

161 isolated from a 4 year-old child with severe gastroenteric symptoms in Japan in 2014.  
162 Three out of its 11 gene segments were closely related to a South African bat RVA strain,  
163 suggesting a reassortment involving a bat RVA strain (38). A third example is two unique  
164 G20 human RVA strains, Ecu534 from Ecuador (39) and 2014735512 from Suriname  
165 (40). The recent identification of the G20 genotype in a Brazilian bat RVA strain (3081)  
166 also suggests a potential bat reservoir for these human strains (31).  
167 All in all, slowly emerging data on bat RVA strains start to show that some unusual  
168 previously identified human and animal RVA strains might actually have been derived  
169 from bats. Therefore, the constant surveillance of novel and reassortant RVA bat strains  
170 from all over the world has to continue in order to better understand the genetic diversity  
171 of bat RVA strains, as well as to maintain both public and animal health. Here we report  
172 identification of 11 bat RVA strains from Bulgaria, Gabon, Ghana and Costa Rica,  
173 providing evidence of multiple reassortment and host switching events from bats to bats  
174 and to other mammals.

175

176

## 177 **RESULTS**

### 178 **Bat rotavirus screening from Europe, Africa and South America samples**

179 As part of several studies screening bat picornaviruses, astroviruses, coronaviruses and  
180 paramyxoviruses, bat faecal samples from Bulgaria, Romania, Germany, Gabon, Ghana  
181 and Costa Rica were previously collected (41–45). In the current study, these samples  
182 were screened for RVA, using a nested RT-PCR targeting a short piece of the highly  
183 conserved polymerase gene (VP1). This screening yielded 18 positives out of the 2,142  
184 screened samples (0.8%) (Table S2). RVA positive samples were collected from five bat



185 families Pteropodidae, Rhinolophidae, Hipposideridae, Phyllostomidae and  
186 Vespertilionidae, and they originated from three continents and all sampling sites except  
187 Romania.

188

#### 189 **Eleven near complete RVA genomes identified from 4 bat families**

190 From 16 of the positive samples, a sufficient amount of sample was available for complete  
191 viral genome sequencing using the NetovIR protocol (Table S3). 118,9 million paired-end  
192 reads (2x150 base pairs) and an average of 7 million paired-end reads/sample were  
193 generated by Illumina sequencing (Table 1). Four samples from Gabon and 1 sample from  
194 Germany did not yield any RVA contigs longer than 500 base pairs and were therefore  
195 not investigated further. From 11 samples near complete RVA genomes could be  
196 retrieved. These RVA samples belonged to 5 out of the 46 tested species (10.8%), from  
197 4 out of the 10 (40%) tested families, as shown in the bat phylogenetic tree (Table S2,  
198 Figure S1). The percentage of reads mapping to RVA in each sample ranged from 0-90%  
199 (Table 1).

200

#### 201 **Distinct and reassorted RVA genotype constellations with 4 novel genotypes**

202 The genotype constellations of the 11 bat RVA strains are shown in Table 2. The genotype  
203 assignments, including novel NSP2 (N23) and NSP4 (E28) genotypes for some of the  
204 Gabonese strains and NSP1 (A32) and NSP3 (T23) genotypes for the strains from Costa  
205 Rica were made according to the guidelines determined by the RCWG (46). Although the  
206 NSP5 gene segment of the Costa Rican strain KCR10-93 most likely also represents a  
207 novel genotype, we were not able to retrieve the complete ORF (despite several attempts  
208 using RT-PCR and Sanger sequencing), which is required for the assignment of a novel

209 genotype (47). Particular genotype constellations were identified in different geographic  
210 locations (Table 2). Gabonese strains were similar to each other, with certain genotypes  
211 shared with the Bulgarian strains (G3, P[3], C3, M3, N3, T3 and E3). However, they do  
212 not cluster closely together (*vide supra*), indicating non-recent reassortment events. The  
213 South American strain KCR10-93 also possessed a unique genotype constellation, except  
214 for the VP4 genotype P[47], which was shared with the Ghanaian strain. Interestingly,  
215 these 2 VP4 genes were very closely related (*vide supra*), suggesting a recent  
216 reassortment event. GKS-912, GKS-926 and GKS-934 appeared to have a co-infection,  
217 as multiple genotypes were identified in these samples for VP2, VP3, VP4, NSP2, NSP3  
218 and NSP4. For GKS-934, 2 near complete VP7 gene segments were identified, both  
219 belonging to the G3 genotype, yet having a substantial nucleotide level dissimilarity (19%,  
220 *vide infra*). This was also the case for K212 possessing 2 distinct M14 genotypes with  
221 12% nucleotide sequence distance.

222

### 223 **At least 7 seven distinct bat RVA constellations distributed worldwide**

224 Even though most animal species, including humans, have a limited number of typical  
225 RVA genotype constellations, the RVAs harboured by bats show a great genetic diversity.  
226 Combining our data with previously published bat RVA genomes showed that there are at  
227 least 7 distinct bat RVA genotype constellations circulating in the bat population (Table 3),  
228 ranging from completely unique to partially overlapping with each other. The Bulgarian  
229 BB89-15 and BR89-60 strains had a genotype constellation identical or very similar to  
230 MSLH14-like RVA strains from China and a partially sequenced strain from Brazil  
231 (“orange” genotype constellation in Table 3). Even though at least 3 of the samples from  
232 Gabon possessed more than one RVA strain, they possessed at least 3 distinct but related

233 genotype constellations (“purple” genotype constellation in Table 3), not previously  
234 identified in bats. It should be noted that there was some genotype overlap for gene  
235 segments VP2-VP4, VP7, NSP2-NSP4 between the orange and purple genotype  
236 constellations, with varying level of phylogenetic relatedness (*vide infra*). Ghanaian strain  
237 K212 possessed a genotype constellation (“green” genotype constellation in Table 3)  
238 identical or very similar to several previously identified Cameroonian bat RVA strains (34),  
239 as well as some partially sequenced bat RVA strains from Zambia (33). Costa Rican RVA  
240 strain KCR10-93 had a distinct genotype constellation (“brown” genotype constellation in  
241 Table 3), including at least 2 previously undescribed genotypes, and shared the G20  
242 genotype with the Brazilian bat strain 3081. Of interest was the P[47] genotype, which  
243 was shared with 2 African strains from the green genotype constellation. The “yellow”  
244 genotype constellation in Table 3 was composed of 2 strains with an identical genotype  
245 constellation from Cameroon (BatLy03) and Saudi Arabia (KSA402), as well as a partially  
246 sequenced strain from Kenya (KE4852). Two genotype constellations (indicated in “blue”  
247 and “dark grey” in Table 3) were only represented by a single bat strain from Kenya  
248 (BATp39) and China (GLRL1), respectively (Table 3). Of note, the former shared the VP6  
249 genotype (I16) with the purple genotype constellation, and for the latter strain, the NSP1  
250 sequence remained undetermined.

251

### 252 **Wide geographic dispersal of certain bat RVA genotype constellations**

253 The global distribution of the RVA genotype constellations revealed several patterns  
254 regarding RVA circulation in bats, as shown in Figure 1. Bat RVAs belonging to the brown,  
255 purple, blue and dark grey genotype constellations have so far only been identified in  
256 Costa Rica (and perhaps Brazil), Gabon, Kenya and China, respectively. On the other

257 hand, the green and yellow genotype constellations were confirmed to be further  
258 dispersed, from Cameroon to Saudi Arabia (G25P[43]), and from Ghana and Cameroon  
259 to Zambia, as was previously suggested by Sasaki *et al.* (48). However, highly similar  
260 RVA strains belonging to the orange MSLH14-like genotype constellations span at least  
261 3 different continents and subcontinents, e.g. Asia, Europe and possibly South America.  
262 Furthermore, it was also shown that RVA strains with distinct genotype constellations  
263 could co-circulate in the same region, as is the case in Cameroon (green, yellow and  
264 purple genotype constellations) and China (orange and dark grey genotype constellations)  
265 (Figure 1).

266

### 267 **Interspecies transmission in bats and potential host range restriction of bat RVAs**

268 The orange genotype constellation was present in various bat families. The Bulgarian  
269 RVA strains were isolated from rhinolophid bats, whereas the Chinese MSLH14-like  
270 strains were found in bats from the Rhinolophidae, Hipposideridae and Emballonuridae  
271 families (Table S4a).

272 In addition to RVA genotype constellations potentially being able to infect multiple bat  
273 families, individual bat families could also harbour more than one genotype constellation,  
274 as is shown in Table S3b. Bat RVA strains with the green (Ghana and Cameroon) and  
275 yellow (Cameroon and Saudi Arabia) genotype constellations have both been found in  
276 straw-coloured fruit bats.

277

### 278 **Reassortments among bat RVA strains**

279 Even though the genotype constellations are somewhat conserved, there are ample  
280 examples for the occurrence of reassortments. In the orange genotype constellation, there

281 are some unusual genotypes such as P[10] for VP4, R20 for VP1 and A29 for NSP1 (Table  
282 S4a and S4c) which are most likely the results of reassortment events with currently  
283 unknown RVA strains (27, 28). Reassortment also takes place between different bat RVA  
284 genotype constellations, albeit to a limited extension. For example, GKS-897 is the only  
285 strain from the purple genotype constellation with the I8 VP6 genotype, which is shared  
286 with several strains from the orange genotype constellation (MSLH-14, BSTM70, MYAS33  
287 and YSSK5), suggesting a reassortment event. A second example is the I16 VP6  
288 genotype, which is shared between BATp39 from Kenya (the only member of the blue  
289 genotype constellation), and most strains of the purple genotype constellation. A third  
290 example is the shared P[47] VP4 genotype between K212 and BatLy17 (green genotype  
291 constellation) and KCR10-93 (brown genotype constellation) (Table 2). Interestingly,  
292 these last 3 strains were 97-100% identical to each other on the nucleotide level for VP4,  
293 suggesting a recent reassortment event. Finally, there are also a few bat RVA strains with  
294 unusual genotype constellations, which do not clearly fall into the 7 described genotype  
295 constellations. RVA strains LUS12-14 and YSSK5, from Zambia and China respectively,  
296 possess several genotypes typical for the orange genotype constellation, in addition to  
297 several other genotypes of unknown origin (Table S4c). Finally, strain 322/Kwale from  
298 Kenya possesses both genotypes typical to the orange and purple genotypes, in addition  
299 to some atypical bat RVA genotypes.

300  
301 **Evidence of interspecies transmissions of bat RVA to humans, horses and**  
302 **potentially non-human primates**

303 We further investigated whether unusual RVA strains detected in other mammals  
304 (including humans) might be a result of an interspecies transmission from bat strains  
305 identified in the current and other studies (Table 3).

306

307 *RVA/Horse-wt/ARG/E3198/2008/G3P[3]*

308 Although it had already been suggested that the unusual horse RVA strain E3198 was of  
309 potential bat origin, our data provided further and more compelling evidence for this, as  
310 strain E3198 showed an identical genotype constellation with the two Bulgarian bat RVA  
311 strains. They displayed a close phylogenetic clustering for all 11 gene segments (Figure  
312 S2, Figures 2-4) and shared very high nucleotide similarities (87-97%). Our dataset was  
313 not optimally suited for molecular clock analysis, but extrapolation of substitution rates of  
314 about  $0.6 \times 10^{-3}$  –  $1.5 \times 10^{-3}$  substitutions/site/year (s/s/y) inferred from analyses of human  
315 RVA (49, 50) suggests that the zoonotic transfer could have taken place within the last  
316 few decades.

317

318 *RVA/Simian-tc/ZAF/SA11-N2/1958/G3P[2]*

319 The unusual simian RVA SA11 has been a reference strain for many rotavirus studies for  
320 decades. Two unusual human RVA strains, ZTR-5 and B10 have 10 and 8 genotypes in  
321 common with SA11, respectively (Table 3). The former strain has only been deposited in  
322 GenBank (without any further discussion), whereas the latter was believed to be the result  
323 of zoonotic transmission from monkeys to humans (51). To our surprise, these 3 strains  
324 were clearly related to the purple bat genotype constellation identified in our study, sharing  
325 up to 9 (B10) and 7 (SA11 and ZTR-5) genotypes (Table 3). For the segments sharing the

326 same genotype the time of the most recent common ancestor or zoonotic transfer was  
327 estimated to be a few decades to centuries ago.

328 Also, according to the pairwise nucleotide identities (Figure S2) and the phylogenetic  
329 analyses of the bat RVA strains from Gabon and Kenya, they were closely related with  
330 B10 for the VP1, VP6, NSP4 gene segments, and with all 3 strains (B10, SA11 and ZTR-  
331 5) for VP2-4, NSP1, NSP3 and NSP5 (Figures 2-4).

332 Not only for SA11, but also for 2 other simian RVA strains, RRV and TUCH, some close  
333 relationships with bat RVA strains were noted. The VP1, VP3, VP4, VP6, VP7, NSP1-5  
334 gene segments of RRV clustered closely with one or multiple bat and bat-related RVA  
335 strains (Figures 2-4). For TUCH, the VP1, NSP1, NSP5 gene segments also clustered  
336 close to bat RVA strains (Figures 2-4). These findings suggest that these simian RVA  
337 strains might also have a common ancestor with bat RVA strains.

338

### 339 *Human-Bat RVA interspecies transmission*

340 Two unusual G20 human RVA strains (Ecu534 and 2014735512) were isolated in 2006  
341 and 2013, respectively in Central America. Costa Rican bat RVA strain KCR10-93 shared  
342 multiple genotypes (Table 3), and medium-high nucleotide similarities (Figure S2) with  
343 2014735512. The most recent common ancestor between the Costa Rican bat and the  
344 human RVA strains was estimated no longer than a few centuries ago. In addition, the  
345 available gene segments cluster relatively closely together (Figures 2-4) phylogenetically.  
346 It should also be noted that the T23 NSP3 genotype is phylogenetically closely related to  
347 the T15 genotype found in the human strains, and the currently unclassified partial NSP5  
348 sequence also has the H15 genotype, as its closest relative.

349 Furthermore, 2 unusual human G3P[9] RVA strains (L621 and E2451), that were detected  
350 in China in 2006 and 2011, respectively, had been speculated to be of animal/bat origin.  
351 Our data further adds support to this hypothesis, as either both or one of them were closely  
352 related to the identified Bulgarian strains for VP3, VP6 and NSP4 (Figures 2-4). Finally,  
353 the unusual human RVA strain RVA/Human-wt/US/09US7118/2009/G3P[24] was also  
354 found to cluster together with one or multiple bat RVA strains for its VP2, VP7, NSP2,  
355 NSP3, NSP4, NSP5 gene segments. Furthermore, its VP3, VP4, VP6 and NSP3 gene  
356 segments clustered closely with the TUCH strain, also hinting at a potential bat origin of  
357 this unusual human strain (*vide supra*).

358

359

## 360 **DISCUSSION**

361 Bats are known hosts of various human pathogens, including viruses such as rabies virus,  
362 henipaviruses, Marburg virus, SARS and MERS CoVs (12–18). In addition, there have  
363 been sporadic reports on several other RNA viruses in bats such as paramyxoviruses,  
364 picornaviruses, orthoreoviruses and astroviruses (52–55). Bat rotaviruses have also been  
365 sporadically reported during the last decade. A novel species, tentatively named rotavirus  
366 J, was isolated from *M. schreibersii* in 2014, followed by rotavirus H, in 2016 and 2018  
367 (22–24). Nonetheless, it was rotavirus A (RVA) that has been the most frequently reported  
368 rotavirus species in bats. This is not very surprising given the fact that RVA has been  
369 detected in a wide range of mammals and birds (56–58). Furthermore, there are plenty of  
370 examples of this enteric pathogen being capable of interspecies transmission in literature,  
371 sometimes in combination with reassortment, between various mammalian species  
372 including humans (59). In some occasions, such animal-derived gene segments (e.g. VP7



373 genotypes G8 from cattle, G9 and presumably G12 from pigs) or complete genotype  
374 constellations (AU-1 like genotype constellations from cats) have become established in  
375 the human population. This established circulation either happened in a limited  
376 geographical region (AU-1 like or G8) or worldwide; such as epidemiologically important  
377 human pathogenic G9 and G12 RVAs (60, 61). It is important to note that even when there  
378 is no clinical presentation in the animal of which the enteric pathogen has been identified,  
379 RV shedding can still contribute to zoonoses (59). Thus, in order to further investigate the  
380 potential of bat RVA strains to spill over between bat species or towards other mammalian  
381 species, we investigated RVA strains from over 2,000 bats, spanning 5 countries in 3  
382 continents. We obtained 11 near complete RVA genomes with a viral metagenomics  
383 approach and the identified genomes were compared and contrasted to known genome  
384 sequences of bat and other host species. We aimed to expand the knowledge on typical  
385 bat genotype constellations as well as their geographical spread and zoonotic potential.

386

### 387 **Driving and restricting forces of bat RVA genetic diversity**

388 Bat RVA strains with at least 7 largely distinct genotype constellations have been identified  
389 up to date (Table 3). This does not come as a surprise given the breadth of this order of  
390 animals and many more bat RVA strains and novel genotype constellations will be  
391 discovered in years to come. In the current study, some of these 7 genotype constellations  
392 have only been found in a single bat (and hence a single location), whereas some  
393 genotype constellations have been found in bats living thousands of kilometres apart  
394 (green and yellow genotype constellations), or even on multiple continents (orange  
395 genotype constellation). Bats have very specialized wing and tail structures for better  
396 manoeuvring and higher flexibility during flight (62). With powered flight, migratory bats

397 can travel long distances between summer and winter roosts, for foraging and searching  
398 for a mate (63). Among long-distance migratory bats, *E.helvum* can cover a range of 270  
399 to 2,500 km (64), vespertilionid ‘tree bats’ and the subtropical/tropical molossid bats can  
400 fly over 1,000 km (65, 66). Global distribution and intercontinental bat virus transfers are  
401 also typical to other bat viruses (43). In addition to migration across vast distances, the  
402 fact that some distinct genotype constellations seem to have overlapping geographical  
403 ranges (such as in China and West Africa in Figure 1) suggest some type of fitness  
404 advantage for these particular genotype constellations. However, there is also ample  
405 evidence of gene reassortment events among established genotype constellations (e.g.  
406 P[47] in green and brown genotype constellation; or I16 in purple and blue genotype  
407 constellation), or with RVA strains of currently unknown origin (e.g. A29, A15, E27).  
408 Apart from geographical location, host physiology and behaviour can also be factors  
409 affecting the viral epidemiology and risk for host switches. As demonstrated by the wide  
410 dispersal of the orange constellation, RVAs belonging to certain bat families might  
411 undergo multiple host switching events. Although dietary habits may not directly determine  
412 the type of pathogens bats carry, it can bring different species close together, providing  
413 plenty of opportunity for interspecies transmissions and subsequent reassortment events  
414 to occur (19). Pteropodid bats harbour completely unique genotype constellations (green  
415 and yellow), suggesting that the associated RVA strains had high epidemiologic fitness in  
416 these populations. This further indicates that the Pteropodidae, which includes the straw-  
417 coloured fruit bats, has been a substantial virus reservoir for a long time already, as also  
418 shown for Marburg virus, Hendra and Nipah viruses (13–15).  
419 It is clear that more bats should be sampled in order to have a comprehensive  
420 understanding of the driving and restricting forces, or the lack thereof. The detection of

421 P[47] reassortment between Ghanaian and Costa Rican bat RVAs, which are located  
422 more than 9,000 km's apart, cannot only be explained by the flight ability of bats, but rather  
423 the lack of sampling between these 2 locations. We hypothesize that with the increasing  
424 bat RVA sequencing efforts, the geographical and host range of most genotype  
425 constellations (such as the blue, grey, yellow and brown) will be significantly expanded.

426

## 427 **Interspecies transmission of bat RVAs to mammalian hosts**

### 428 *Bat RVA transmission to a horse*

429 In 2013, Miño and colleagues reported an unusual Argentinian equine G3P[3] RVA strain  
430 E3198. Based on the genotype constellation, it was speculated to have a common  
431 ancestor with both feline/canine RVA strains, as well as the unusual rhesus RVA strain  
432 RRV. However, the nucleotide identities were below the 90% for most of the genome  
433 segments, suggesting that the original host may not be identified yet (37). When more bat  
434 RVA genomes became available in subsequent years, Xia and colleagues, and later also  
435 Biao He and colleagues, suggested that E3198 might be of bat origin, based on the  
436 genotype constellations and nucleotide similarities (27, 28). However, the very close  
437 genetic relationship between E3198 and the Bulgarian strains presented in this paper  
438 across all 11 gene segments (Figure S4) seems to provide final proof for the bat origin of  
439 this unusual equine RVA strain.

440

### 441 *Bat RVA transmission to simians and humans*

442 RVA strain SA11 was isolated from an overtly healthy vervet monkey in 1958 and has  
443 subsequently been used extensively as a laboratory strain in RVA growth, virulence,  
444 genome replication and in recent years also a reverse genetics research (67–69).

445 However, its origin remained obscure, as related strains were never identified in vervet  
446 monkeys or other non-human primates ever after. In 2011, Ghosh and colleagues  
447 identified an unusual RVA strain B10 from a child in Kenya, which shared 8 out of 11  
448 genotypes with SA11. They speculated about a simian or other animal origin of this  
449 unusual human strain (51). Around the same time, a second human SA11-like RVA strain  
450 ZTR-5 was deposited in GenBank by researchers from China as a potential vaccine  
451 candidate. However, the controversy about the origin of these SA11-like strains remained.  
452 To our surprise, the purple genotype constellation described in this paper, and containing  
453 only the bat RVA strains from Gabon, showed a remarkable similarity with these SA11-  
454 like strains, sharing up to 9 genotypes with B10 and up to 7 genotypes with SA11 and  
455 ZTR-5 (Table 3). Also phylogenetically, these bat RVA strains are the closest relatives of  
456 these SA11 like RVA strains for most gene segments (Figures 2-4). The finding that the  
457 purple SA11-like genotype constellation was found in multiple bats in Gabon, and only on  
458 a single occasion in vervet monkeys and in 2 unrelated human cases, makes bats the  
459 prime suspect of being the major hosts of these viruses, making the monkey and humans  
460 strains likely examples of interspecies transmissions. It should however be noted that the  
461 phylogenetic clustering between these bat, simian and human strains is still rather variable  
462 and not as high as was the case between bat RVA strains and E3198 (Table S4, Figures  
463 2-4). However, 2 other bat strains are of further interest: 1) the bat RVA strain 322/Kwale  
464 (only available as a GenBank entry at this point) seems to have a mixed genotype  
465 constellation possessing both characteristics of the orange and purple genotype  
466 constellations (Table 3). Especially, the purple genotypes R8, M5 and A5 of 322/Kwale  
467 are of interest as they are much more closely related to the SA11-like strain than the  
468 Gabon bat RVA strain (Figure 2); 2) the bat RVA strain BATp39 (only available in

469 GenBank) possesses a single purple genotype I16, and again this is more closely related  
470 to the SA11-like strain B10, compared to the Gabon RVA strains. Taken all together, we  
471 speculate that with further RVA screenings in bat populations, more bat RVA strains that  
472 are closely related to the vervet monkey RVA strain SA11 and human SA11-like RVA  
473 strains will be detected.

474

#### 475 *Further examples of zoonotic transmission to humans*

476 The G3 genotype is usually associated with P[8] genotype in humans RVAs, and  
477 combinations such as G3P[3] and G3P[9] are only sporadically found in the human  
478 population (70). Nonetheless, in the 2000-2001 season, a rare G3P[3] human rotavirus  
479 CMH222 was detected in a 2 year-old severely diarrheic patient in Thailand (41). It was  
480 reported to have a VP7 gene closely related to the simian RRV strain and a VP4 gene  
481 that was caprine-like. Following this study, Xia and colleagues speculated that even  
482 though only the VP4, VP7, VP6 and NSP4 gene segments are characterized, this strain  
483 is distinct from typical human RVA genotype constellations and very likely shared a  
484 common ancestor with Asian bat RVAs (33). Our current study further adds evidence to  
485 the hypothesis of the bat origin of CMH222, as the VP6 I8 genotype of CMH222 is closely  
486 related to the GKS-897 strain (Figure 3).

487 Later on, Wang and colleagues contributed to the list of unusual Southeast Asian human  
488 RVA strains. Possessing the G3P[9] genotypes, both the L621 and E2451 strains were  
489 isolated from a symptomatic adult and a symptomatic child, in 2006 and 2011, respectively  
490 (71). Complete genome analyses revealed a high genetic relatedness to strains of  
491 feline/canine origin for almost all 11 genes. L621 and E2451 also clustered near the  
492 aforementioned unusual equine strain E3198 for the VP3, VP6, NSP2, NSP5 genes; and

493 L621 additionally also clustered with the E3198 NSP3 gene. In the current study, we have  
494 observed that these atypical Asian human strains were also closely related to the  
495 Bulgarian bat RVA strains for VP3, VP6, NSP2, NSP4, NSP5 and Gabonese strains for  
496 NSP2, NSP3, NSP4 of the orange genotype constellation (Figures 2-4). These additional  
497 findings further add, as well as complicate the identification of the most likely bat host,  
498 from which the L621 and E2451 strains jumped to humans.

499 Following these potential zoonosis reports, Esona and colleagues also revealed  
500 remarkable findings in Latin America in 2018, where only limited bat RVA information is  
501 present to date (40). A human RVA strain 2014735512 was isolated in Suriname in 2013,  
502 and possessed a rare G20 genotype, which was also detected in an Ecuadorian human  
503 RVA strain in 2006. Remarkably, it was associated to the Brazilian bat strain 3081 for  
504 VP7, NSP3 and NSP5 segments and speculated to be of bat origin as these genotypes  
505 have not been detected in any other animal species so far. The Costa Rican bat RVA  
506 strain KCR10-93, which was isolated in this study, also showed a close relatedness to  
507 2014735512 strain, and this clearly suggests that this unusual human strain could be of  
508 bat RVA origin.

509

## 510 **Conclusion**

511 Despite the limited number of bat species that have been screened for rotaviruses, a  
512 surprisingly large genetic diversity of RVA strains is presented in this study. With  
513 increasing screening efforts, it is without a doubt that this diversity will expand both  
514 genetically and geographically. We also presented multiple examples of interspecies  
515 transmission events involving humans and animals. This has always been restricted to  
516 sporadic cases so far and has, to the best of our knowledge, never resulted in major

517 outbreaks in human. However, it is believed that the rotavirus genotype constellations  
518 currently circulating in humans also have a common ancestor with animal rotaviruses (3),  
519 highlighting that interspecies transmissions following establishment in the human  
520 population could happen again.

521 Another notable finding is that the SA11 RVA strain, which is used in global rotavirus  
522 research for decades, might be of bat origin. Furthermore, this SA11 strain has been  
523 recently used as the backbone strain for a RVA reverse genetics system, and is therefore  
524 likely to be used even more in the future. It would be intriguing to test whether or not SA11  
525 grows well in bat cell lines, or in *in vivo* infection experiments.

526

527

## 528 **MATERIALS AND METHODS**

### 529 **Sample collection**

530 Faecal samples were collected from 2,142 bats from 10 bat families, representing 46 bat  
531 species (Table S2). Sample collection took place in Ghana, Gabon, Bulgaria, Romania,  
532 Germany and Costa Rica during 2008-2010 as part of investigations of various other  
533 viruses in bats, such as coronavirus, astrovirus, and picornavirus, as described previously  
534 (41–45). Bat species were determined by trained field biologists. For European and Costa  
535 Rican studies, bats were caught with mist nets, put into cotton bags and faecal pellets are  
536 collected. Ghanaian faecal droppings were collected with plastic foil from the trees in  
537 which *E. helvum* bats were roosting. The pellets were kept in RNAlater RNA stabilization  
538 solution (QIAGEN, Hilden, Germany). Gabonese bats were also captured with mist nets  
539 just before twilight and were individually euthanized. Bat faeces were collected with the  
540 corresponding permissions in all of the studies according the host countries.

541

## 542 **RT-PCR rotavirus screening and viral metagenomics**

543 Viral RNA was isolated from the faecal specimens as described previously (44). To screen  
544 the RVA presence in bats, conserved primer pairs targeting the VP1 gene were used (277  
545 nucleotide long PCR product) in a hemi-nested and single round reverse transcription  
546 (RT-PCR) assay (Table S1). Among the 18 positive specimens (Tables S2-S3), 16 faecal  
547 samples, of which sufficient material was left, were shipped to the Laboratory of Clinical  
548 and Epidemiological Virology, Leuven, Belgium on dry ice for further complete genome  
549 analyses (Table 1).

550 The NetoVIR protocol was used for viral enrichment of the faecal suspensions as  
551 described before (72). Briefly, the faecal samples were suspended in dPBS and  
552 homogenized with a MINILYS homogenizer (Bertin Technologies) for 20s at 3,000 rpm.  
553 The homogenates were centrifuged for 3 min at 17,000 g and filtered with 0,8 µm PES  
554 filters (Sartorius). Filtrates were treated with benzonase (Novagen) and micrococcal  
555 nuclease (New England Biolabs) at 37 °C for 2 h to remove the free-floating nucleic acids.  
556 Subsequently, samples were extracted using the QIAamp Viral RNA Mini Kit (Qiagen)  
557 according to the manufacturer's instructions, without addition of carrier RNA to  
558 the lysis buffer. Reverse transcription and second strand synthesis was performed by an  
559 adjusted version of the Whole Transcriptome Amplification (WTA2) protocol as described  
560 previously (Sigma-Aldrich) (73). Sequencing library was constructed with the Nextera XT  
561 Library Preparation Kit (Illumina). The size of the library was checked with Bioanalyzer  
562 (Agilent Technologies) with a High Sensitivity DNA chip and the 2nM pooled libraries were  
563 sequenced on an Illumina NextSeq 500 platform (2x150bp paired-end).

564



## 565 **Data analysis**

566 Low quality reads, ambiguous bases, primer and adapter sequences were removed from  
567 the paired-end reads with Trimmomatic v0.36 with default parameters (74). Trimmed  
568 reads were *de novo* assembled with metaSPAdes from SPAdes software v3.11.1 using  
569 21, 33, 55, 77 k-mer lengths (75). The obtained contigs were annotated with DIAMOND  
570 v0.9.10 against a non-redundant protein database (76). The contigs annotated as  
571 “Rotavirus” were further investigated using the nucleotide BLAST against a nucleotide  
572 reference database to identify the gene segments (77). The incomplete contigs were  
573 completed *in silico* by mapping the trimmed reads of corresponding samples against the  
574 reference sequence determined by the highest BLASTn nucleotide similarity with the  
575 lowest e-value using BWA software v0.5.9 (78) and SAMtools v1.6 (79). Open reading  
576 frames were determined by the web-based NCBI ORF Finder tool (80)  
577 ([www.ncbi.nlm.nih.gov/orffinder](http://www.ncbi.nlm.nih.gov/orffinder)).

578

## 579 **Genotype constellations and phylogenetic analyses**

580 The genotypes were assigned using RotaC tool (<http://rotac.regatools.be>). The  
581 sequences that could not be assigned to any established genotype were sent to the  
582 RCWG for assignment of novel genotypes.

583 Codon-based nucleotide level multiple sequence alignments were done using MUSCLE  
584 (81) with default parameters in MEGA software v7.0.26 (82). Pairwise nucleotide  
585 distances were calculated using maximum composite likelihood algorithm (83).  
586 Alignments were trimmed with trimAL v1.2 and GTR+G+I substitution model was used  
587 (84). Phylogenetic trees were reconstructed with BEAST software v1.10.4 (85). The  
588 BEAST input file was configured in BEAUTi with strict molecular clock and constant size

589 coalescent tree prior. 100,000,000 sample states were generated in MCMC analysis at  
590 every 10,000-50,000 steps with effective sample size (ESS) values for all the continuous  
591 parameters higher than 200, and posterior probabilities were calculated. The initial 10%  
592 of the sample trees were discarded as burn-in in TreeAnnotator v1.8.4 (86). Tracer v1.6  
593 (87) was used for the visualization of the MCMC trace files and FigTree v1.4.3 from the  
594 BEAST package was used for phylogenetic tree visualization and manipulation (88).  
595 Maximum likelihood trees with 500 bootstraps and Tamure-Nei model were also  
596 generated in MEGA to confirm the tree topologies. The genotype constellations are  
597 illustrated on a world map using the maps package in R software (89).

598

#### 599 **Data availability**

600 The data have been deposited with links to BioProject accession number  
601 PRJNA562472 in the NCBI BioProject database  
602 (<https://www.ncbi.nlm.nih.gov/bioproject/>). The data is also deposited to GenBank under  
603 the following accession numbers: MN433617-27 (BB89-15), MN539284-94 (BR89-60),  
604 MN528116-26 (GKS-897), MN477236-46 (GKS-912), MN528101-15 (GKS-926),  
605 MN528075-85 (GKS-929), MN528086-MN528100 (GKS-934), MN551587-97 (GKS-941),  
606 MN477225-35 (GKS-954), MN551598-MN551608 (KCR10-93), MN567261-72 (K212).

607

#### 608 **Ethical Statement**

609 Bat capture and sampling were conducted with the permissions of the Wildlife and Hunting  
610 Department of the Gabonese Ministry of Water and Forestry (N°003/MEFE-PA/  
611 SG/DGEF/DCF and N°0021/MEFE-PA/SG/DGEF/DCF), and under clearance  
612 314/5327.74.1.6 from the State Office of Energy and Agriculture, the Environment and

613 Rural Areas Schleswig-Holstein (LANU) and clearances 133/24.03.2008 and 192/  
614 26.03.2009 from the Bulgarian Ministry of Environment and Water. For the Ghanaian bats,  
615 ethics approval was obtained from the Committee for Human Research, Publications and  
616 Ethics of Komfo Anokye Teaching Hospital and School of Medical Sciences, Kwame  
617 Nkrumah University of Science and Technology, Kumasi. Research samples were  
618 exported under a state agreement between the Republic of Ghana and the Federal  
619 Republic of Germany, represented by the City of Hamburg. Additional export permission  
620 was obtained from the Veterinary Services of the Ghana Ministry of Food and Agriculture.

621

## 622 **Acknowledgements**

623 This project has received funding from the European Union's Horizon 2020 research and  
624 innovation programme under the Marie Skłodowska-Curie agreement No 721367 granted  
625 to J.F.D, J.M and M.V.R. EU Horizon 2020 projects EVAg (grant agreement number  
626 653316) and COMPARE (agreement number 643476) granted to C.D, and the Russian  
627 Science Foundation grant 19-15-00055 to A.N.L also provided funding to the current  
628 study. H.U.E. had a personal scholarship from the BONFOR intramural programme at the  
629 University of Bonn. German Federal Ministry of Education and Research (BMBF) (project  
630 code 01KIO16D), Deutsche Forschungsgemeinschaft (DFG DR 772-3/1), Deutsche  
631 Forschungsgemeinschaft within the Africa Infectious Diseases program through grants to  
632 C.D and Y.A.S (DR 772/3-1) and to S.O (KA1241/18-1) were also among the funding  
633 contributions. A personal scholarship granted to A.R from the German Academic  
634 Exchange Service (DAAD) supported field work in Costa Rica. D.J is supported by the  
635 'Fonds Wetenschappelijk Onderzoek' (Research foundation Flanders (1S78019N). L.B  
636 was supported by the 'Fonds Wetenschappelijk Onderzoek' (1S61618N). K.C.Y was

637 funded by the Interfaculty Council for Development Cooperation (IRO) from the KU  
638 Leuven. The computing power in this work was provided by the VSC (Flemish  
639 Supercomputer Centre), financed by the FWO and the Flemish government – department  
640 EWI.

641 **REFERENCES**

- 642
- 643 1. Clark A, Black R, Tate J, Roose A, Kotloff K, Lam D, Blackwelder W, Parashar U,  
644 Lanata C, Kang G, Troeger C, Platts-Mills J, Mokdad A, Sanderson C, Lamberti L,  
645 Levine M, Santosham M, Steele D. 2017. Estimating global, regional and national  
646 rotavirus deaths in children aged <5 years: Current approaches, new analyses and  
647 proposed improvements. PLoS ONE 12.
- 648 2. Estes MK, Kapikian AZ. 2007. Rotaviruses, p. 1917–1974. *In* Knipe, DM, Howley,  
649 PM, Griffin, DE, Lamb, RA, Martin, MA, Roizman, B, Straus, SE (eds.), *Fields*  
650 *Virology*. Kluwer Health/Lippincott, Williams and Wilkins, Philadelphia.
- 651 3. Matthijnssens J, Ciarlet M, Heiman E, Arijs I, Delbeke T, McDonald SM, Palombo  
652 EA, Iturriza-Gómara M, Maes P, Patton JT, Rahman M, Ranst MV. 2008. Full  
653 Genome-Based Classification of Rotaviruses Reveals a Common Origin between  
654 Human Wa-Like and Porcine Rotavirus Strains and Human DS-1-Like and Bovine  
655 Rotavirus Strains. *J Virol* 82:3204–3219.
- 656 4. Matthijnssens J, Ciarlet M, McDonald SM, Attoui H, Bányai K, Brister JR, Buesa J,  
657 Esona MD, Estes MK, Gentsch JR, Iturriza-Gómara M, Johne R, Kirkwood CD,  
658 Martella V, Mertens PPC, Nakagomi O, Parreño V, Rahman M, Ruggeri FM, Saif LJ,  
659 Santos N, Steyer A, Taniguchi K, Patton JT, Desselberger U, Van Ranst M. 2011.  
660 Uniformity of Rotavirus Strain Nomenclature Proposed by the Rotavirus  
661 Classification Working Group (RCWG). *Arch Virol* 156:1397–1413.

- 662 5. Matthijnssens J, Ciarlet M, Rahman M, Attoui H, Bányai K, Estes MK, Gentsch JR,  
663 Iturriza-Gómara M, Kirkwood CD, Martella V, Mertens PPC, Nakagomi O, Patton JT,  
664 Ruggeri FM, Saif LJ, Santos N, Steyer A, Taniguchi K, Desselberger U, Van Ranst  
665 M. 2008. Recommendations for the classification of group A rotaviruses using all 11  
666 genomic RNA segments. *Arch Virol*.
- 667 6. Maes P, Matthijnssens J, Rahman M, Van Ranst M. 2009. RotaC: A web-based tool  
668 for the complete genome classification of group A rotaviruses. *BMC Microbiol*  
669 <https://doi.org/10.1186/1471-2180-9-238>.
- 670 7. Matthijnssens J, Potgieter CA, Ciarlet M, Parreño V, Martella V, Bányai K,  
671 Garaicoechea L, Palombo EA, Novo L, Zeller M, Arista S, Gerna G, Rahman M,  
672 Ranst MV. 2009. Are Human P[14] Rotavirus Strains the Result of Interspecies  
673 Transmissions from Sheep or Other Ungulates That Belong to the Mammalian Order  
674 Artiodactyla? *J Virol* 83:2917–2929.
- 675 8. Kim H-H, Matthijnssens J, Kim H-J, Kwon H-J, Park J-G, Son K-Y, Ryu E-H, Kim D-  
676 S, Lee WS, Kang M-I, Yang D-K, Hyun B-H, Park S-I, Park S-J, Cho K-O. 2012. Full-  
677 length genomic analysis of porcine G9P[23] and G9P[7] rotavirus strains isolated  
678 from pigs with diarrhea in South Korea. *Infect Genet Evol* 12:1427–1435.
- 679 9. Matthijnssens J, Miño S, Papp H, Potgieter C, Novo L, Heylen E, Zeller M,  
680 Garaicoechea L, Badaracco A, Lengyel G, Kisfali P, Cullinane A, Collins PJ, Ciarlet  
681 M, O’Shea H, Parreño V, Bányai K, Barrandeguy M, Van Ranst M. 2012. Complete  
682 molecular genome analyses of equine rotavirus A strains from different continents

- 683 reveal several novel genotypes and a largely conserved genotype constellation. *J*  
684 *Gen Virol* 93:866–875.
- 685 10. Matthijnssens J, De Grazia S, Piessens J, Heylen E, Zeller M, Giammanco GM,  
686 Bányai K, Buonavoglia C, Ciarlet M, Martella V, Van Ranst M. 2011. Multiple  
687 reassortment and interspecies transmission events contribute to the diversity of  
688 feline, canine and feline/canine-like human group A rotavirus strains. *Infect Genet*  
689 *Evol* 11:1396–1406.
- 690 11. Schmid R, Wilson DonE, Reeder DM. 2006. *Mammal Species of the World: A*  
691 *Taxonomic and Geographic Reference*. Taxon <https://doi.org/10.2307/1223169>.
- 692 12. Badrane H, Tordo N. 2001. Host Switching in Lyssavirus History from the Chiroptera  
693 to the Carnivora Orders. *J Virol* 75:8096–8104.
- 694 13. Chua KB, Lek Koh C, Hooi PS, Wee KF, Khong JH, Chua BH, Chan YP, Lim ME,  
695 Lam SK. 2002. Isolation of Nipah virus from Malaysian Island flying-foxes. *Microbes*  
696 *Infect* 4:145–151.
- 697 14. Halpin K, Young PL, Field HE, Mackenzie JS. 2000. Isolation of Hendra virus from  
698 pteropid bats: a natural reservoir of Hendra virus. *J Gen Virol* 81:1927–1932.
- 699 15. Towner JS, Amman BR, Sealy TK, Carroll SAR, Comer JA, Kemp A, Swanepoel R,  
700 Paddock CD, Balinandi S, Khristova ML, Formenty PBH, Albarino CG, Miller DM,  
701 Reed ZD, Kayiwa JT, Mills JN, Cannon DL, Greer PW, Byaruhanga E, Farnon EC,  
702 Atimnedi P, Okware S, Katongole-Mbidde E, Downing R, Tappero JW, Zaki SR,

- 703 Ksiazek TG, Nichol ST, Rollin PE. 2009. Isolation of Genetically Diverse Marburg  
704 Viruses from Egyptian Fruit Bats. *PLoS Pathog* 5.
- 705 16. Li W, Shi Z, Yu M, Ren W, Smith C, Epstein JH, Wang H, Crameri G, Hu Z, Zhang  
706 H, Zhang J, McEachern J, Field H, Daszak P, Eaton BT, Zhang S, Wang L-F. 2005.  
707 Bats are natural reservoirs of SARS-like coronaviruses. *Science* 310:676–679.
- 708 17. Wang Q, Qi J, Yuan Y, Xuan Y, Han P, Wan Y, Ji W, Li Y, Wu Y, Wang J, Iwamoto  
709 A, Woo PCY, Yuen K-Y, Yan J, Lu G, Gao GF. 2014. Bat Origins of MERS-CoV  
710 Supported by Bat Coronavirus HKU4 Usage of Human Receptor CD26. *Cell Host*  
711 *Microbe* 16:328–337.
- 712 18. Zhou P, Yang X-L, Wang X-G, Hu B, Zhang L, Zhang W, Si H-R, Zhu Y, Li B, Huang  
713 C-L, Chen H-D, Chen J, Luo Y, Guo H, Jiang R-D, Liu M-Q, Chen Y, Shen X-R, Wang  
714 X, Zheng X-S, Zhao K, Chen Q-J, Deng F, Liu L-L, Yan B, Zhan F-X, Wang Y-Y, Xiao  
715 G-F, Shi Z-L. 2020. A pneumonia outbreak associated with a new coronavirus of  
716 probable bat origin. *Nature* 579:270–273.
- 717 19. Wong S, Lau S, Woo P, Yuen K-Y. 2007. Bats as a continuing source of emerging  
718 infections in humans. *Rev Med Virol* 17:67–91.
- 719 20. Calisher CH, Childs JE, Field HE, Holmes KV, Schountz T. 2006. Bats: Important  
720 Reservoir Hosts of Emerging Viruses. *Clin Microbiol Rev* 19:531–545.
- 721 21. Olival KJ, Hosseini PR, Zambrana-Torrel C, Ross N, Bogich TL, Daszak P. 2017.  
722 Host and viral traits predict zoonotic spillover from mammals. *Nature* 546:646–650.



- 723 22. Kim HK, Yoon S-W, Kim D-J, Koo B-S, Noh JY, Kim JH, Choi YG, Na W, Chang K-  
724 T, Song D, Jeong DG. 2016. Detection of Severe Acute Respiratory Syndrome-Like,  
725 Middle East Respiratory Syndrome-Like Bat Coronaviruses and Group H Rotavirus  
726 in Faeces of Korean Bats. *Transbound Emerg Dis* 63:365–372.
- 727 23. Yinda CK, Ghogomu SM, Conceição-Neto N, Beller L, Deboutte W, Vanhulle E, Maes  
728 P, Van Ranst M, Matthijnssens J. 2018. Cameroonian fruit bats harbor divergent  
729 viruses, including rotavirus H, bastroviruses, and picobirnaviruses using an  
730 alternative genetic code. *Virus Evol* 4.
- 731 24. Bányai K, Kemenesi G, Budinski I, Földes F, Zana B, Marton S, Varga-Kugler R,  
732 Oldal M, Kurucz K, Jakab F. 2017. Candidate new rotavirus species in Schreiber’s  
733 bats, Serbia. *Infect Genet Evol* 48:19–26.
- 734 25. Esona MD, Mijatovic-Rustempasic S, Conrardy C, Tong S, Kuzmin IV, Agwanda B,  
735 Breiman RF, Banyai K, Niezgodá M, Rupprecht CE, Gentsch JR, Bowen MD. 2010.  
736 Reassortant Group A Rotavirus from Straw-colored Fruit Bat (*Eidolon helvum*).  
737 *Emerg Infect Dis* 16:1844–1852.
- 738 26. He B, Yang F, Yang W, Zhang Y, Feng Y, Zhou J, Xie J, Feng Y, Bao X, Guo H, Li  
739 Y, Xia L, Li N, Matthijnssens J, Zhang H, Tu C. 2013. Characterization of a Novel  
740 G3P[3] Rotavirus Isolated from a Lesser Horseshoe Bat: a Distant Relative of  
741 Feline/Canine Rotaviruses. *J Virol* 87:12357–12366.
- 742 27. Xia L, Fan Q, He B, Xu L, Zhang F, Hu T, Wang Y, Li N, Qiu W, Zheng Y,  
743 Matthijnssens J, Tu C. 2014. The complete genome sequence of a G3P[10] Chinese

- 744 bat rotavirus suggests multiple bat rotavirus inter-host species transmission events.  
745 Infect Genet Evol 28:1–4.
- 746 28. He B, Huang X, Zhang F, Tan W, Matthijssens J, Qin S, Xu L, Zhao Z, Yang L,  
747 Wang Q, Hu T, Bao X, Wu J, Tu C. 2017. Group A Rotaviruses in Chinese Bats:  
748 Genetic Composition, Serology, and Evidence for Bat-to-Human Transmission and  
749 Reassortment. *J Virol* 91.
- 750 29. Zheng X, Qiu M, Guan W, Li J, Chen S, Cheng M, Huo S, Chen Z, Wu Y, Jiang L,  
751 Chen Q. 2018. Viral metagenomics of six bat species in close contact with humans  
752 in southern China. *Arch Virol* 163:73–88.
- 753 30. Dacheux L, Cervantes-Gonzalez M, Guigon G, Thiberge J-M, Vandebogaert M,  
754 Maufrais C, Caro V, Bourhy H. 2014. A Preliminary Study of Viral Metagenomics of  
755 French Bat Species in Contact with Humans: Identification of New Mammalian  
756 Viruses. *PLoS ONE* 9:e87194.
- 757 31. Asano KM, Gregori F, Hora AS, Scheffer KC, Fahl WO, Iamamoto K, Mori E, Silva  
758 FDF, Taniwaki SA, Brandão PE. 2016. Group A rotavirus in Brazilian bats: description  
759 of novel T15 and H15 genotypes. *Arch Virol* 161:3225–3230.
- 760 32. Sasaki M, Orba Y, Sasaki S, Gonzalez G, Ishii A, Hang'ombe BM, Mweene AS, Ito  
761 K, Sawa H. 2016. Multi-reassortant G3P[3] group A rotavirus in a horseshoe bat in  
762 Zambia. *J Gen Virol* 97:2488–2493.
- 763 33. Sasaki M, Kajihara M, Changula K, Mori-Kajihara A, Ogawa H, Hang'ombe BM,  
764 Mweene AS, Simuunza M, Yoshida R, Carr M, Orba Y, Takada A, Sawa H. 2018.

- 765 Identification of group A rotaviruses from Zambian fruit bats provides evidence for  
766 long-distance dispersal events in Africa. *Infect Genet Evol* 63:104–109.
- 767 34. Yinda CK, Zeller M, Conceição-Neto N, Maes P, Deboutte W, Beller L, Heylen E,  
768 Ghogomu SM, Van Ranst M, Matthijnssens J. 2016. Novel highly divergent  
769 reassortant bat rotaviruses in Cameroon, without evidence of zoonosis. *Sci Rep*  
770 6:34209.
- 771 35. Waruhiu C, Ommeh S, Obanda V, Agwanda B, Gakuya F, Ge X-Y, Yang X-L, Wu L-  
772 J, Zohaib A, Hu B, Shi Z-L. 2017. Molecular detection of viruses in Kenyan bats and  
773 discovery of novel astroviruses, caliciviruses and rotaviruses. *Viol Sin* 32:101–114.
- 774 36. Mishra N, Fagbo SF, Alagaili AN, Nitido A, Williams SH, Ng J, Lee B, Durosini  
775 A, Garcia JA, Jain K, Kapoor V, Epstein JH, Briese T, Memish ZA, Olival KJ, Lipkin  
776 WI. 2019. A viral metagenomic survey identifies known and novel mammalian viruses  
777 in bats from Saudi Arabia. *PLoS ONE* 14.
- 778 37. Miño S, Matthijnssens J, Badaracco A, Garaicoechea L, Zeller M, Heylen E, Van  
779 Ranst M, Barrandeguy M, Parreño V. 2013. Equine G3P[3] rotavirus strain E3198  
780 related to simian RRV and feline/canine-like rotaviruses based on complete genome  
781 analyses. *Vet Microbiol* 161:239–246.
- 782 38. Okitsu S, Hikita T, Thongprachum A, Khamrin P, Takanashi S, Hayakawa S,  
783 Maneekarn N, Ushijima H. 2018. Detection and molecular characterization of two  
784 rare G8P[14] and G3P[3] rotavirus strains collected from children with acute  
785 gastroenteritis in Japan. *Infect Genet Evol* 62:95–108.

- 786 39. Solberg OD, Hasing ME, Trueba G, Eisenberg JNS. 2009. Characterization of novel  
787 VP7, VP4, and VP6 genotypes of a previously untypeable group A rotavirus. *Virology*  
788 385:58–67.
- 789 40. Esona MD, Roy S, Rungsruriyachai K, Gautam R, Hermelijn S, Rey-Benito G,  
790 Bowen MD. 2018. Molecular characterization of a human G20P[28] rotavirus a strain  
791 with multiple genes related to bat rotaviruses. *Infect Genet Evol J Mol Epidemiol Evol*  
792 *Genet Infect Dis* 57:166–170.
- 793 41. Corman VM, Rasche A, Diallo TD, Cottontail VM, Stöcker A, Souza BF de CD, Corrêa  
794 JI, Carneiro AJB, Franke CR, Nagy M, Metz M, Knörnschild M, Kalko EKV, Ghanem  
795 SJ, Morales KDS, Salsamendi E, Spínola M, Herrler G, Voigt CC, Tschapka M,  
796 Drosten C, Drexler JF. 2013. Highly diversified coronaviruses in neotropical bats. *J*  
797 *Gen Virol* 94:1984–1994.
- 798 42. Pfefferle S, Oppong S, Drexler JF, Gloza-Rausch F, Ipsen A, Seebens A, Müller MA,  
799 Annan A, Vallo P, Adu-Sarkodie Y, Kruppa TF, Drosten C. 2009. Distant Relatives of  
800 Severe Acute Respiratory Syndrome Coronavirus and Close Relatives of Human  
801 Coronavirus 229E in Bats, Ghana. *Emerg Infect Dis* 15:1377–1384.
- 802 43. Lukashev AN, Corman VM, Schacht D, Gloza-Rausch F, Seebens-Hoyer A, Gmyl  
803 AP, Drosten C, Drexler JF. 2017. Close genetic relatedness of picornaviruses from  
804 European and Asian bats. *J Gen Virol* 98:955–961.
- 805 44. Drexler JF, Gloza-Rausch F, Glende J, Corman VM, Muth D, Goettsche M, Seebens  
806 A, Niedrig M, Pfefferle S, Yordanov S, Zhelyazkov L, Hermanns U, Vallo P, Lukashev

- 807 A, Müller MA, Deng H, Herrler G, Drosten C. 2010. Genomic Characterization of  
808 Severe Acute Respiratory Syndrome-Related Coronavirus in European Bats and  
809 Classification of Coronaviruses Based on Partial RNA-Dependent RNA Polymerase  
810 Gene Sequences. *J Virol* 84:11336–11349.
- 811 45. Rougeron V, Suquet E, Maganga GD, Jiolle D, Mombo IM, Bourgarel M, Motsch P,  
812 Arnathau C, Durand P, Drexler F, Drosten C, Renaud F, Prugnotte F, Leroy EM.  
813 2016. Characterization and phylogenetic analysis of new bat astroviruses detected  
814 in Gabon, Central Africa. *Acta Virol* 60:386–392.
- 815 46. Matthijnssens J, Ciarlet M, McDonald SM, Attoui H, Bányai K, Brister JR, Buesa J,  
816 Esona MD, Estes MK, Gentsch JR, Iturriza-Gómara M, Johne R, Kirkwood CD,  
817 Martella V, Mertens PPC, Nakagomi O, Parreño V, Rahman M, Ruggeri FM, Saif LJ,  
818 Santos N, Steyer A, Taniguchi K, Patton JT, Desselberger U, van Ranst M. 2011.  
819 Uniformity of rotavirus strain nomenclature proposed by the Rotavirus Classification  
820 Working Group (RCWG). *Arch Virol* <https://doi.org/10.1007/s00705-011-1006-z>.
- 821 47. Matthijnssens J, Ciarlet M, Rahman M, Attoui H, Bányai K, Estes MK, Gentsch JR,  
822 Iturriza-Gómara M, Kirkwood CD, Martella V, Mertens PPC, Nakagomi O, Patton JT,  
823 Ruggeri FM, Saif LJ, Santos N, Steyer A, Taniguchi K, Desselberger U, Van Ranst  
824 M. 2008. Recommendations for the classification of group A rotaviruses using all 11  
825 genomic RNA segments. *Arch Virol* 153:1621–1629.
- 826 48. Sasaki M, Kajihara M, Changula K, Mori-Kajihara A, Ogawa H, Hang'ombe BM,  
827 Mweene AS, Simuunza M, Yoshida R, Carr M, Orba Y, Takada A, Sawa H. 2018.  
828 Identification of group A rotaviruses from Zambian fruit bats provides evidence for

- 829 long-distance dispersal events in Africa. *Infect Genet Evol*  
830 <https://doi.org/10.1016/j.meegid.2018.05.016>.
- 831 49. Zeller M, Donato C, Trovão NS, Cowley D, Heylen E, Donker NC, McAllen JK,  
832 Akopov A, Kirkness EF, Lemey P, Van Ranst M, Matthijnssens J, Kirkwood CD. 2015.  
833 Genome-Wide Evolutionary Analyses of G1P[8] Strains Isolated Before and After  
834 Rotavirus Vaccine Introduction. *Genome Biol Evol* 7:2473–2483.
- 835 50. Dennis AF, McDonald SM, Payne DC, Mijatovic-Rustempasic S, Esona MD, Edwards  
836 KM, Chappell JD, Patton JT. 2014. Molecular Epidemiology of Contemporary G2P[4]  
837 Human Rotaviruses Cocirculating in a Single U.S. Community: Footprints of a  
838 Globally Transitioning Genotype. *J Virol* 88:3789–3801.
- 839 51. Ghosh S, Gatheru Z, Nyangao J, Adachi N, Urushibara N, Kobayashi N. 2011. Full  
840 genomic analysis of a simian SA11-like G3P[2] rotavirus strain isolated from an  
841 asymptomatic infant: Identification of novel VP1, VP6 and NSP4 genotypes. *Infect*  
842 *Genet Evol* 11:57–63.
- 843 52. Drexler JF, Corman VM, Müller MA, Maganga GD, Vallo P, Binger T, Gloza-Rausch  
844 F, Cottontail VM, Rasche A, Yordanov S, Seebens A, Knörnschild M, Oppong S,  
845 Sarkodie YA, Pongombo C, Lukashev AN, Schmidt-Chanasit J, Stöcker A, Carneiro  
846 AJB, Erbar S, Maisner A, Fronhoffs F, Buettner R, Kalko EKV, Kruppa T, Franke CR,  
847 Kallies R, Yandoko ERN, Herrler G, Reusken C, Hassanin A, Krüger DH, Matthee S,  
848 Ulrich RG, Leroy EM, Drosten C. 2012. Bats host major mammalian  
849 paramyxoviruses. *Nat Commun* 3:796.

- 850 53. Lau SKP, Woo PCY, Lai KKY, Huang Y, Yip CCY, Shek C-T, Lee P, Lam CSF, Chan  
851 K-H, Yuen K-Y. 2011. Complete Genome Analysis of Three Novel Picornaviruses  
852 from Diverse Bat Species. *J Virol* 85:8819–8828.
- 853 54. Pritchard LI, Chua KB, Cummins D, Hyatt A, Crameri G, Eaton BT, Wang L-F. 2006.  
854 Pulau virus; a new member of the Nelson Bay orthoreovirus species isolated from  
855 fruit bats in Malaysia. *Arch Virol* 151:229–239.
- 856 55. Chu DKW, Poon LLM, Guan Y, Peiris JSM. 2008. Novel Astroviruses in Insectivorous  
857 Bats. *J Virol* 82:9107–9114.
- 858 56. Holland RE. 1990. Some infectious causes of diarrhea in young farm animals. *Clin*  
859 *Microbiol Rev* 3:345–375.
- 860 57. Guy JS. 1998. Virus infections of the gastrointestinal tract of poultry. *Poult Sci*  
861 77:1166–1175.
- 862 58. Dhama K, Chauhan RS, Mahendran M, Malik SVS. 2009. Rotavirus diarrhea in  
863 bovines and other domestic animals. *Vet Res Commun* 33:1–23.
- 864 59. Cook N, Bridger J, Kendall K, Gomara MI, El-Attar L, Gray J. 2004. The zoonotic  
865 potential of rotavirus. *J Infect* 48:289–302.
- 866 60. Rahman M, Matthijnssens J, Goegebuer T, De Leener K, Vanderwegen L, van der  
867 Donck I, Van Hoovels L, De Vos S, Azim T, Van Ranst M. 2005. Predominance of  
868 rotavirus G9 genotype in children hospitalized for rotavirus gastroenteritis in Belgium  
869 during 1999–2003. *J Clin Virol* 33:1–6.

- 870 61. Rahman M, Matthijnsens J, Yang X, Delbeke T, Arijs I, Taniguchi K, Iturriza-Gómara  
871 M, Iftekharuddin N, Azim T, Van Ranst M. 2007. Evolutionary History and Global  
872 Spread of the Emerging G12 Human Rotaviruses. *J Virol* 81:2382–2390.
- 873 62. Hedenström A, Johansson LC. 2015. Bat flight. *Curr Biol* 25:R399–R402.
- 874 63. Voigt CC, Frick WF, Holderied MW, Holland R, Kerth G, Mello MAR, Plowright RK,  
875 Swartz S, Yovel Y. 2017. Principles and Patterns of Bat Movements: From  
876 Aerodynamics to Ecology. *Q Rev Biol* 92:267–287.
- 877 64. Richter HV, Cumming GS. 2008. First application of satellite telemetry to track African  
878 straw-coloured fruit bat migration. *J Zool* 275:172–176.
- 879 65. Cryan PM, Stricker CA, Wunder MB. 2014. Continental-scale, seasonal movements  
880 of a heterothermic migratory tree bat. *Ecol Appl* 24:602–616.
- 881 66. Fleming TH, Eby P. 2005. Ecology of bat migration, p. 159–166. *In* Kunz, TH, Fenton,  
882 B (eds.), *Bat ecology*. University of Chicago Press, Chicago, IL.
- 883 67. Malherbe H, Harwin R. 1963. The cytopathic effects of vervet monkey viruses. *South*  
884 *Afr Med J Suid-Afr Tydskr Vir Geneesk* 37:407–411.
- 885 68. Small C, Barro M, Brown TL, Patton JT. 2007. Genome Heterogeneity of SA11  
886 Rotavirus Due to Reassortment with “O” Agent. *Virology* 359:415.
- 887 69. Komoto S, Sasaki J, Taniguchi K. 2006. Reverse genetics system for introduction of  
888 site-specific mutations into the double-stranded RNA genome of infectious rotavirus.  
889 *Proc Natl Acad Sci* 103:4646–4651.



- 890 70. Dóró R, László B, Martella V, Leshem E, Gentsch J, Parashar U, Bányai K. 2014.  
891 Review of global rotavirus strain prevalence data from six years post vaccine  
892 licensure surveillance: Is there evidence of strain selection from vaccine pressure?  
893 *Infect Genet Evol* 28:446–461.
- 894 71. Wang Y-H, Pang B-B, Zhou X, Ghosh S, Tang W-F, Peng J-S, Hu Q, Zhou D-J,  
895 Kobayashi N. 2013. Complex evolutionary patterns of two rare human G3P[9]  
896 rotavirus strains possessing a feline/canine-like H6 genotype on an AU-1-like  
897 genotype constellation. *Infect Genet Evol* 16:103–112.
- 898 72. Conceição-Neto N, Zeller M, Lefrère H, De Bruyn P, Beller L, Deboutte W, Yinda CK,  
899 Lavigne R, Maes P, Ranst M Van, Heylen E, Matthijnssens J. 2015. Modular  
900 approach to customise sample preparation procedures for viral metagenomics: A  
901 reproducible protocol for virome analysis. *Sci Rep* 5.
- 902 73. Yinda CK, Zeller M, Conceição-Neto N, Maes P, Deboutte W, Beller L, Heylen E,  
903 Ghogomu SM, Van Ranst M, Jelle A. 2016. Novel highly divergent reassortant bat  
904 rotaviruses in Cameroon, without evidence of zoonosis. *Sci Rep*  
905 <https://doi.org/10.1038/srep34209>.
- 906 74. Bolger AM, Lohse M, Usadel B. 2014. Trimmomatic: A flexible trimmer for Illumina  
907 sequence data. *Bioinformatics* <https://doi.org/10.1093/bioinformatics/btu170>.
- 908 75. Nurk S, Meleshko D, Korobeynikov A, Pevzner PA. 2017. MetaSPAdes: A new  
909 versatile metagenomic assembler. *Genome Res*  
910 <https://doi.org/10.1101/gr.213959.116>.

- 911 76. Buchfink B, Xie C, Huson DH. 2014. Fast and sensitive protein alignment using  
912 DIAMOND. *Nat Methods*.
- 913 77. Altschul SF, Gish W, Miller W, Myers EW, Lipman DJ. 1990. Basic local alignment  
914 search tool. *J Mol Biol* [https://doi.org/10.1016/S0022-2836\(05\)80360-2](https://doi.org/10.1016/S0022-2836(05)80360-2).
- 915 78. Li H, Durbin R. 2010. Fast and accurate long-read alignment with Burrows-Wheeler  
916 transform. *Bioinformatics* <https://doi.org/10.1093/bioinformatics/btp698>.
- 917 79. Li H, Handsaker B, Wysoker A, Fennell T, Ruan J, Homer N, Marth G, Abecasis G,  
918 Durbin R, 1000 Genome Project Data Processing Subgroup. 2009. The Sequence  
919 Alignment/Map format and SAMtools. *Bioinforma Oxf Engl* 25:2078–2079.
- 920 80. Wheeler DL, Church DM, Federhen S, Lash AE, Madden TL, Pontius JU, Schuler  
921 GD, Schriml LM, Sequeira E, Tatusova TA, Wagner L. 2003. Database resources of  
922 the National Center for Biotechnology. *Nucleic Acids Res*  
923 <https://doi.org/10.1093/nar/gkg033>.
- 924 81. Edgar RC. 2004. MUSCLE: Multiple sequence alignment with high accuracy and high  
925 throughput. *Nucleic Acids Res* <https://doi.org/10.1093/nar/gkh340>.
- 926 82. Kumar S, Stecher G, Tamura K. 2016. MEGA7: Molecular Evolutionary Genetics  
927 Analysis Version 7.0 for Bigger Datasets. *Mol Biol Evol*  
928 <https://doi.org/10.1093/molbev/msw054>.
- 929 83. Tamura K, Nei M, Kumar S. 2004. Prospects for inferring very large phylogenies by  
930 using the neighbor-joining method. *Proc Natl Acad Sci U S A* 101:11030–11035.

- 931 84. Capella-Gutiérrez S, Silla-Martínez JM, Gabaldón T. 2009. trimAl: A tool for  
932 automated alignment trimming in large-scale phylogenetic analyses. *Bioinformatics*  
933 <https://doi.org/10.1093/bioinformatics/btp348>.
- 934 85. Drummond AJ, Suchard MA, Xie D, Rambaut A. 2012. Bayesian phylogenetics with  
935 BEAUti and the BEAST 1.7. *Mol Biol Evol* <https://doi.org/10.1093/molbev/mss075>.
- 936 86. Rambaut A, Drummond AJ. 2016. TreeAnnotator v1.8.4. <http://beast.bio.ed.ac.uk/>.
- 937 87. Rambaut A, Surchard MA, Xie D, Drummond AJ. 2014. Tracer v1.6. Available  
938 [HttpbeastbioedacukTracer](http://beast.bio.ed.ac.uk/Tracer).
- 939 88. Hancock JM, Zvelebil MJ, Cummings MP. 2014. *FigTreeDictionary of Bioinformatics*  
940 *and Computational Biology*.
- 941 89. Becker RA, Allan R, Wilks, Deckmyn A, Ray Brownrigg, Thomas P, Minka. 2018.  
942 *maps: Draw Geographical Maps*.
- 943

944 **Tables and Figures**

945 **Table 1. Meta-data and NGS summary of the sequenced RVA-positive samples**

| Sample ID      | Location         | Country    | Year | Bat species                   | Bat Diet | Raw Reads   | Trimmed Reads | N° of RVA reads <sup>a</sup> | RVA read percentage <sup>b</sup> |
|----------------|------------------|------------|------|-------------------------------|----------|-------------|---------------|------------------------------|----------------------------------|
| BB89-15        | Elenas Cave      | Bulgaria   | 2008 | <i>Rhinolophus blasii</i>     | Insect   | 13,508,743  | 3,850,458     | 56,536                       | 1.5%                             |
| BR89-60        | Roman Horse Cave | Bulgaria   | 2008 | <i>Rhinolophus euryale</i>    | Insect   | 11,812,353  | 3,224,700     | 2,278                        | 0.1%                             |
| SW78-39        | Wahlstorf, SH    | Germany    | 2008 | <i>Myotis daubentonii</i>     | Insect   | 5,720,709   | 5,411,241     | 0                            | 0.0%                             |
| GKS-660        | Zadie            | Gabon      | 2009 | <i>Hipposideros caffer</i>    | Insect   | 7,356,697   | 5,404,115     | 4                            | 0.0%                             |
| GKS-897        | Faucon           | Gabon      | 2009 | <i>Hipposideros gigas</i>     | Insect   | 6,994,665   | 3,938,299     | 30,929                       | 0.8%                             |
| GKS-912        | Faucon           | Gabon      | 2009 | <i>Hipposideros gigas</i>     | Insect   | 4,018,151   | 2,968,694     | 1,236,102                    | 41.6%                            |
| GKS-926        | Faucon           | Gabon      | 2009 | <i>Hipposideros gigas</i>     | Insect   | 6,346,691   | 4,955,591     | 4,479,073                    | 90.4%                            |
| GKS-929        | Faucon           | Gabon      | 2009 | <i>Hipposideros gigas</i>     | Insect   | 993,739     | 718,192       | 315,056                      | 43.9%                            |
| GKS-934        | Faucon           | Gabon      | 2009 | <i>Hipposideros gigas</i>     | Insect   | 7,341,726   | 5,454,901     | 35,259                       | 0.7%                             |
| GKS-941        | Faucon           | Gabon      | 2009 | <i>Hipposideros gigas</i>     | Insect   | 5,923,863   | 3,741,568     | 442,380                      | 11.8%                            |
| GKS-942        | Faucon           | Gabon      | 2009 | <i>Hipposideros gigas</i>     | Insect   | 8,363,558   | 6,453,805     | 0                            | 0.0%                             |
| GKS-953        | Faucon           | Gabon      | 2009 | <i>Hipposideros gigas</i>     | Insect   | 4,361,523   | 3,358,374     | 22                           | 0.0%                             |
| GKS-954        | Faucon           | Gabon      | 2009 | <i>Hipposideros gigas</i>     | Insect   | 7,358,552   | 5,683,659     | 201,335                      | 3.5%                             |
| GKS-955        | Faucon           | Gabon      | 2009 | <i>Hipposideros gigas</i>     | Insect   | 5,704,559   | 3,820,529     | 23                           | 0.0%                             |
| K212           | Kumasi           | Ghana      | 2009 | <i>Eidolon helvum</i>         | Fruit    | 8,367,278   | 5,189,608     | 17,206                       | 0.3%                             |
| KCR10-93       | Orosi            | Costa Rica | 2010 | <i>Carollia perspicillata</i> | Insect   | 7,731,234   | 2,235,422     | 12,179                       | 0.5%                             |
| <b>Average</b> |                  |            |      |                               |          | 6,994,003   | 4,150,572     | 426,774                      | 12.2%                            |
| <b>Total</b>   |                  |            |      |                               |          | 118,929,778 | 67,370,384    | 6,828,382                    |                                  |

<sup>a</sup> Number of unique trimmed reads mapping to RVA genomic segments in the corresponding sample

<sup>b</sup> Proportion of RVA reads to all the reads in the corresponding sample

946

947 **Table 2.** Color-coded genotype constellations of the bat RVA strains identified in this  
 948 study. In some samples, 2 different variants of the same gene segments were identified,  
 949 suggesting co-infections. K212 possessed 2 distinct VP3 gene segments belonging to the  
 950 same M14 genotype (indicated with an asterisk). NSP5 gene of KCR10-93 could not be  
 951 assigned to any of the established genotypes; neither assigned to a novel genotype as  
 952 the complete ORF could not be determined. Therefore, this genotype is indicated as “H?”.  
 953

| Strains                               | VP7 | VP4   | VP6 | VP1 | VP2 | VP3  | NSP1 | NSP2 | NSP3 | NSP4 | NSP5 |
|---------------------------------------|-----|-------|-----|-----|-----|------|------|------|------|------|------|
| RVA/Bat-wt/BGR/BB89-15/2008/G3P[3]    | G3  | P[3]  | I3  | R3  | C3  | M3   | A9   | N3   | T3   | E3   | H6   |
| RVA/Bat-wt/BGR/BB89-60/2008/G3P[3]    | G3  | P[3]  | I3  | R3  | C3  | M3   | A9   | N3   | T3   | E3   | H6   |
| RVA/Bat-wt/GAB/GKS-897/2009/G3P[3]    | G3  | P[3]  | I8  | R8  | C5  | M5   | A5   | N3   | T5   | E3   | H5   |
| RVA/Bat-wt/GAB/GKS-954/2009/G3P[3]    | G3  | P[3]  | I16 | R8  | C5  | M5   | A5   | N3   | T3   | E3   | H5   |
| RVA/Bat-wt/GAB/GKS-941/2009/G3P[3]    | G3  | P[3]  | I16 | R8  | C5  | M5   | A5   | N3   | T3   | E3   | H5   |
| RVA/Bat-wt/GAB/GKS-929/2009/G3P[2]    | G3  | P[2]  | I16 | R8  | C5  | M5   | A5   | N23  | T5   | E28  | H5   |
| RVA/Bat-wt/GAB/GKS-912/2009/G3P[3-2]  | G3  | P[3]  | I16 | R8  | C5  | M5   | A5   | N3   | T3   | E3   | H5   |
|                                       |     | P[2]  |     |     |     |      |      |      |      |      |      |
| RVA/Bat-wt/GAB/GKS-926/2009/G3P[3-2]  | G3  | P[3]  | I16 | R8  | C5  | M5   | A5   | N3   | T3   | E3   | H5   |
|                                       |     | P[2]  |     |     |     |      |      |      |      |      |      |
| RVA/Bat-wt/GAB/GKS-934/2009/G3P[3-2]  | G3  | P[2]  | I16 | R8  | C3  | M3   | A5   | N3   | T5   | E3   | H5   |
|                                       |     | P[3]  |     |     | C5  | M5   |      |      |      |      |      |
| RVA/Bat-wt/GHA/K212/2009/G30P[47]     | G30 | P[47] | I22 | R15 | C15 | M14* | A25  | N15  | T17  | E22  | H17  |
| RVA/Bat-wt/CRC/KCR10-93/2010/G20P[47] | G20 | P[47] | I13 | R13 | C13 | M12  | A32  | N13  | T23  | E20  | H?   |

954 **Table 3.** Colour-coded genotype constellations for the bat RVA strains identified in this  
955 study, previously published bat RVA strains, as well as a selection of RVA strains from  
956 other host species potentially related to bats. The non-sequenced segments or  
957 unassigned genotypes are denoted with '[letter code]'. The genotypes coloured in light  
958 grey are less relevant due to a lack of (in)direct genomic relationship with bat RVAs  
959 identified in the current study. The strain names are colour-matched with the  
960 corresponding genotype constellations (orange, purple, blue, green, brown, grey and  
961 yellow).

962

| Strains                                      | VP7 | VP4   | VP6 | VP1 | VP2 | VP3 | NSP1 | NSP2 | NSP3 | NSP4 | NSP5 |
|----------------------------------------------|-----|-------|-----|-----|-----|-----|------|------|------|------|------|
| RVA/Human-tc/JPN/AU-1/1982/G3P[9]            | G3  | P[9]  | I3  | R3  | C3  | M3  | A3   | N3   | T3   | E3   | H3   |
| RVA/Human-wt/CHN/E2451/2011/G3P[9]           | G3  | P[9]  | I3  | R3  | C3  | M3  | A3   | N3   | T3   | E3   | H6   |
| RVA/Human-tc/CHN/L621/2006/G3P[9]            | G3  | P[9]  | I3  | R3  | C3  | M3  | A3   | N3   | T3   | E3   | H6   |
| RVA/Horse-wt/ARG/E3198/2008/G3P[3]           | G3  | P[3]  | I3  | R3  | C3  | M3  | A9   | N3   | T3   | E3   | H6   |
| <b>RVA/Bat-wt/BGR/BB89-15/2008/G3P[3]</b>    | G3  | P[3]  | I3  | R3  | C3  | M3  | A9   | N3   | T3   | E3   | H6   |
| <b>RVA/Bat-wt/BGR/BB89-60/2008/G3P[3]</b>    | G3  | P[3]  | I3  | R3  | C3  | M3  | A9   | N3   | T3   | E3   | H6   |
| RVA/Bat-wt/CHN/LZHP2/2015/G3P[3]             | G3  | P[3]  | I3  | R3  | C3  | M3  | A9   | N3   | T3   | E3   | H6   |
| RVA/Bat-wt/BRA/4754/2013/G3P[3]              | G3  | P[3]  | I?  | R?  | C?  | M?  | A?   | N?   | T3   | E3   | H6   |
| RVA/Bat-tc/CHN/MSLH14/2012/G3P[3]            | G3  | P[3]  | I8  | R3  | C3  | M3  | A9   | N3   | T3   | E3   | H6   |
| RVA/Bat-wt/CHN/BSTM70/2015/G3P[3]            | G3  | P[3]  | I8  | R3  | C3  | M3  | A29  | N3   | T3   | E3   | H6   |
| RVA/Bat-tc/CHN/MYAS3/2013/G3P[10]            | G3  | P[10] | I8  | R3  | C3  | M3  | A9   | N3   | T3   | E3   | H6   |
| RVA/Human-wt/US/09US7118/2009/G3P[24]        | G3  | P[24] | I2  | R2  | C3  | M3  | A9   | N3   | T3   | E3   | H6   |
| RVA/Monkey/USA/TUCH/2003/G3P[24]             | G3  | P[24] | I9  | R3  | C3  | M3  | A9   | N1   | T3   | E3   | H6   |
| RVA/Simian-tc/USA/RRV/1975/G3P[3]            | G3  | P[3]  | I9  | R2  | C3  | M3  | A9   | N2   | T3   | E3   | H6   |
| RVA/Bat-wt/ZMB/LUS12-14/2012/G3P[3]          | G3  | P[3]  | I3  | R2  | C2  | M3  | A9   | N2   | T3   | E2   | H3   |
| RVA/Dog-tc/ITA/RV198-95/1995/G3P[3]          | G3  | P[3]  | I3  | R3  | C2  | M3  | A9   | N2   | T3   | E3   | H6   |
| RVA/Dog/HUN/135/2012/G3P[3]                  | G3  | P[3]  | I3  | R3  | C3  | M3  | A15  | N2   | T3   | E3   | H6   |
| RVA/Bat-wt/CHN/YSSK5/2015/G3P[3]             | G3  | P[3]  | I8  | R20 | C2  | M1  | A9   | N3   | T3   | E3   | H6   |
| RVA/Bat/KEN/322/Kwale/2015/G3P[10]           | G3  | P[10] | I2  | R8  | C3  | M5  | A5   | N3   | T6   | E3   | H6   |
| <b>RVA/Bat-wt/GAB/GKS-897/2009/G3P[3]</b>    | G3  | P[3]  | I8  | R8  | C5  | M5  | A5   | N3   | T5   | E3   | H5   |
| <b>RVA/Bat-wt/GAB/GKS-954/2009/G3P[3]</b>    | G3  | P[3]  | I16 | R8  | C5  | M5  | A5   | N3   | T3   | E3   | H5   |
| <b>RVA/Bat-wt/GAB/GKS-941/2009/G3P[3]</b>    | G3  | P[3]  | I16 | R8  | C5  | M5  | A5   | N3   | T3   | E3   | H5   |
| <b>RVA/Bat-wt/GAB/GKS-929/2009/G3P[2]</b>    | G3  | P[2]  | I16 | R8  | C5  | M5  | A5   | N23  | T5   | E28  | H5   |
| <b>RVA/Bat-wt/GAB/GKS-912/2009/G3P[3-2]</b>  | G3  | P[3]  | I16 | R8  | C5  | M5  | A5   | N3   | T3   | E3   | H5   |
| <b>RVA/Bat-wt/GAB/GKS-926/2009/G3P[3-2]</b>  | G3  | P[3]  | I16 | R8  | C5  | M5  | A5   | N3   | T3   | E3   | H5   |
| <b>RVA/Bat-wt/GAB/GKS-934/2009/G3P[3-2]</b>  | G3  | P[2]  | I16 | R8  | C3  | M3  | A5   | N3   | T3   | E3   | H5   |
| RVA/Human-tc/KEN/B10/1987/G3P[2]             | G3  | P[2]  | I16 | R8  | C5  | M5  | A5   | N5   | T5   | E13  | H5   |
| RVA/Simian-tc/ZAF/SA11-N2/1958/G3P[2]        | G3  | P[2]  | I2  | R2  | C5  | M5  | A5   | N5   | T5   | E2   | H5   |
| RVA/Human/CHN/ZTR-5/G3P[2]                   | G3  | P[2]  | I2  | R2  | C5  | M5  | A5   | N2   | T5   | E2   | H5   |
| <b>RVA/Bat-wt/KEN/BAT p39/2015/G36P[51]</b>  | G36 | P[51] | I16 | R22 | C20 | M20 | A31  | N22  | T22  | E27  | H22  |
| <b>RVA/Bat-wt/CMR/BatLy17/2014/G30P[47]</b>  | G30 | P[47] | I22 | R15 | C15 | M14 | A25  | N15  | T17  | E22  | H17  |
| <b>RVA/Bat-wt/GHA/K212/2009/G30P[47]</b>     | G30 | P[47] | I22 | R15 | C15 | M14 | A25  | N15  | T17  | E22  | H17  |
| RVA/Bat-wt/CMR/BatLi10/2014/G30P[42]         | G30 | P[42] | I22 | R15 | C15 | M14 | A25  | N15  | T17  | E22  | H17  |
| RVA/Bat-wt/CMR/BatLi09/2014/G30P[42]         | G30 | P[42] | I22 | R15 | C15 | M14 | A25  | N15  | T17  | E22  | H17  |
| RVA/Bat-wt/CMR/BatLi08/2014/G31P[42]         | G31 | P[42] | I22 | R15 | C15 | M14 | A25  | N15  | T17  | E22  | H17  |
| RVA/Bat-wt/ZMB/ZFB14-52/2014/G31P[x]         | G31 | P?    | I22 | R?  | C?  | M?  | A?   | N?   | T17  | E?   | H?   |
| RVA/Bat-wt/ZMB/ZFB14-135/2014/G31P[x]        | G31 | P?    | I22 | R15 | C?  | M?  | A?   | N?   | T17  | E?   | H?   |
| RVA/Bat-wt/ZMB/ZFB14-126/2014/GxP[x]         | G31 | P?    | I22 | R?  | C?  | M?  | A?   | N21  | T17  | E27  | H?   |
| <b>RVA/Bat-wt/CRC/KCR10-93/2010/G20P[47]</b> | G20 | P[47] | I13 | R13 | C13 | M12 | A32  | N13  | T23  | E20  | H?   |
| RVA/Bat-wt/3081/BRA/2013/G20P[x]             | G20 | P?    | I?  | R?  | C?  | M?  | A?   | N?   | T15  | E?   | H15  |
| RVA/Human-wt/SUR/2014735512/2013/G20P[28]    | G20 | P[28] | I13 | R13 | C13 | M12 | A23  | N13  | T15  | E20  | H15  |
| RVA/Human-wt/ECU/Ecu534/2006/G20P[28]        | G20 | P[28] | I13 | R?  | C?  | M?  | A?   | N?   | T?   | E?   | H?   |
| <b>RVA/Bat-wt/CHN/GLRL1/2005/G33P[48]</b>    | G33 | P[48] | I25 | R19 | C18 | M18 | A?   | N19  | T20  | E25  | H20  |
| RVA/Bat-wt/CMR/BatLy03/2014/G25P[43]         | G25 | P[43] | I15 | R16 | C8  | M15 | A26  | N8   | T11  | E23  | H10  |
| RVA/Bat/SAU/KSA402/2012/G25P[43]             | G25 | P[43] | I15 | R16 | C8  | M15 | A26  | N8   | T11  | E23  | H10  |
| RVA/Bat-wt/KEN/KE4852/07/2007/G25P[6]        | G25 | P[6]  | I15 | R?  | C8  | M?  | A?   | N8   | T11  | E2   | H10  |

963

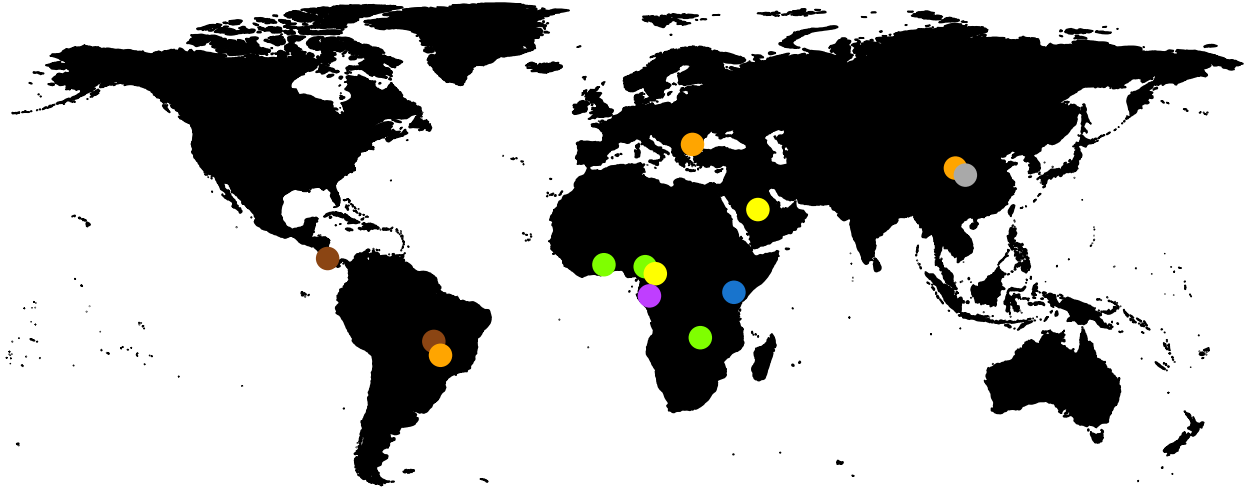

964 **Figure 1.** Geographic distribution of the currently known bat RVA genotype constellations.  
965 The coloured circles represent the circulating genotypes at the specified locations  
966 according to the strain colours highlighted in Table 3.



967

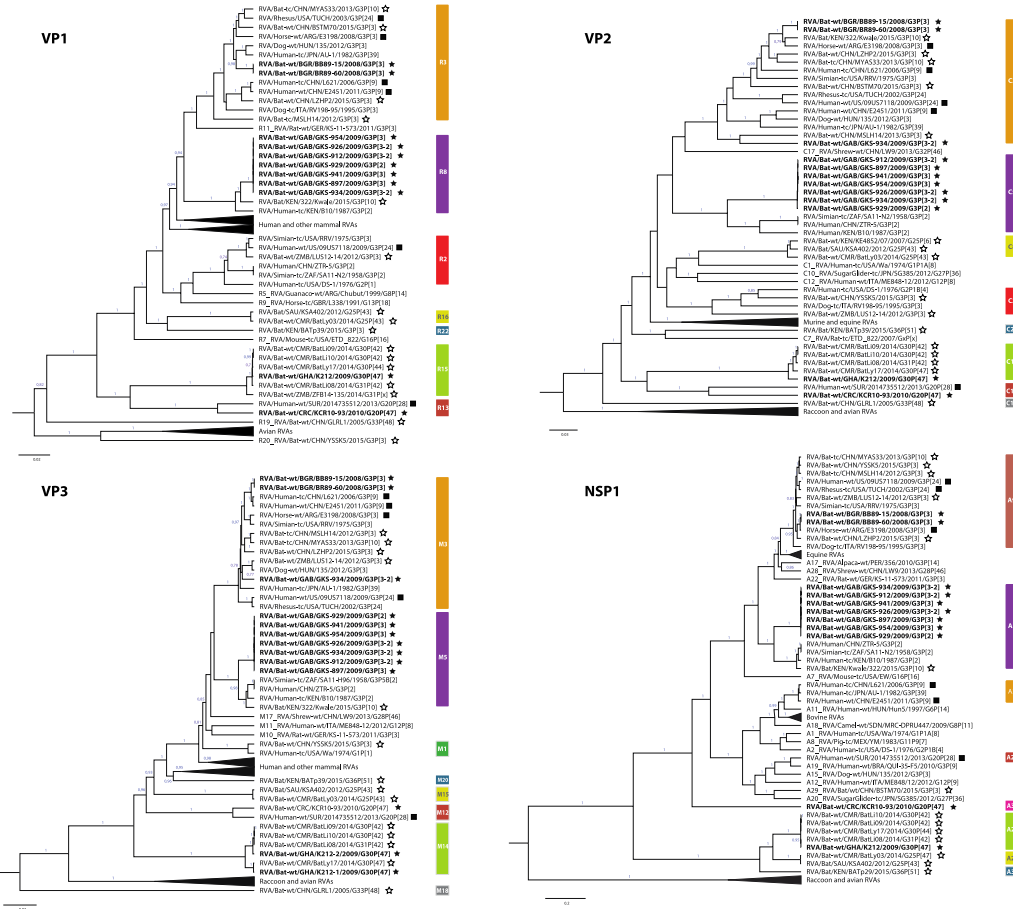

968

969

**Figure 2.** Maximum clade credibility trees of the VP1, VP2, VP3 and NSP1 gene

970

segments of the identified bat RVA strains with known human and other mammal RVAs

971

using BEAST. Only posterior probability values above 0.7 are shown. The genotypes of

972

the strains are listed on the right side of the trees. The bat RVA strains identified in this

973

study are shown in bold marked with filled stars, previously reported bat RVA strains are

974

marked with open stars, and non-bat RVA strains related to a bat RVA strain are marked

975

with filled squares.

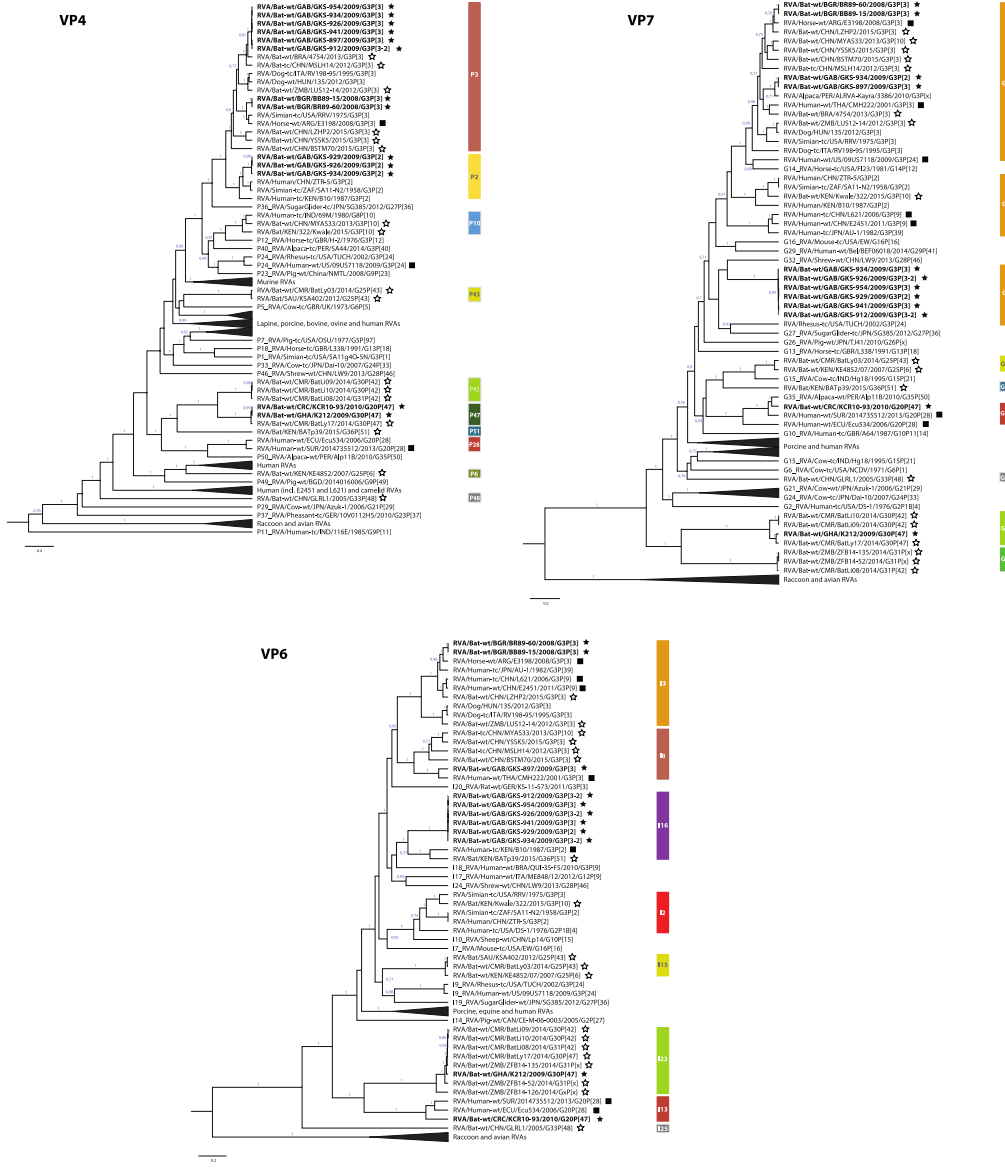

976

977 **Figure 3.** Maximum clade credibility trees of the VP4, VP6 and VP7 gene segments of  
 978 the identified bat RVA strains with known human and other mammal RVAs using BEAST.  
 979 Only posterior probability values above 0.7 are shown. The genotypes of the strains are  
 980 listed on the right side of the trees. The bat RVA strains identified in this study are shown  
 981 in bold marked with filled stars, previously reported bat RVA strains are marked with open  
 982 stars, and non-bat RVA strains related to a bat RVA are marked with filled squares.

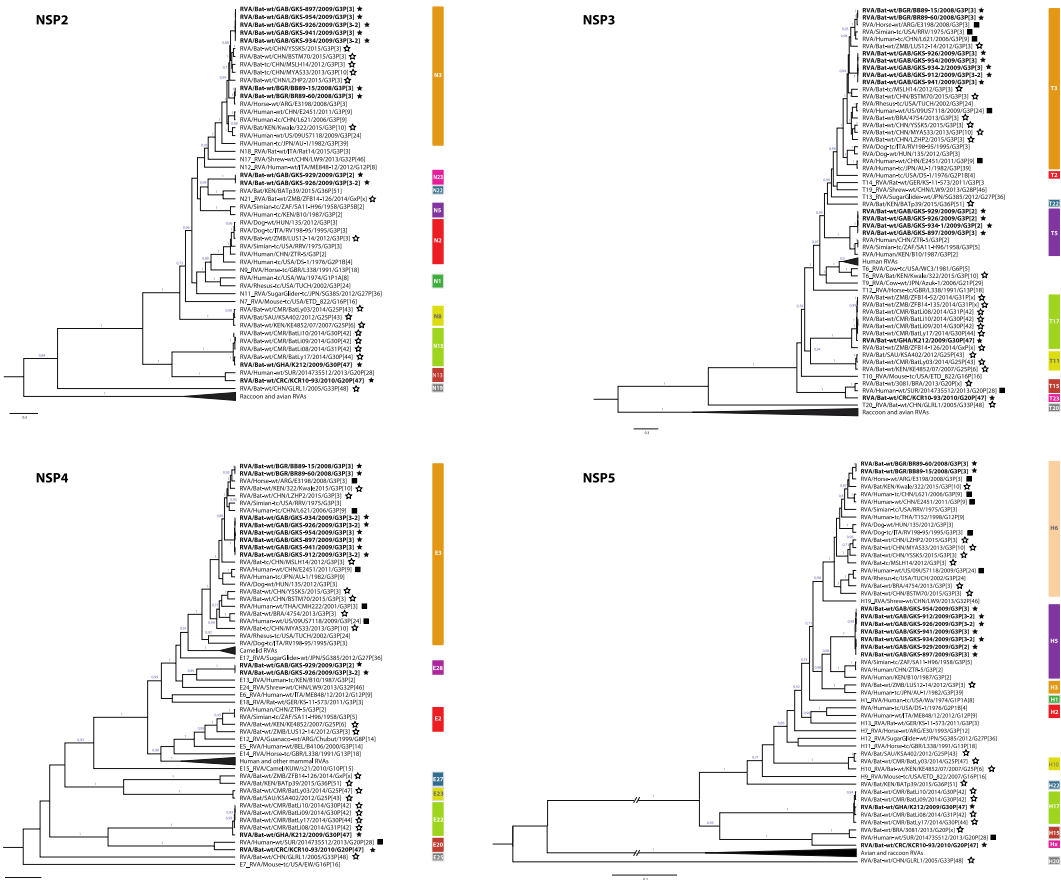

983

984

985

986

987

988

989

990

991

992

**Figure 4.** Maximum clade credibility trees of the NSP2, NSP3, NSP4 and NSP5 gene segments of the identified bat RVA strains with known human and other mammal RVAs using BEAST. Only posterior probability values above 0.7 are shown. The genotypes of the strains are listed on the right side of the trees. The bat RVA strains identified in this study are shown in bold marked with filled stars, previously reported bat RVA strains are marked with open stars, and non-bat RVA strains related to a bat RVA strain are marked with filled squares.

993 **Table S1.** RT-PCR oligonucleotides for the initial rotavirus screening against VP1

| ID no.         | Sequence (5' → 3')         | Position               | Genome segment | Polarity | Assay type                               |
|----------------|----------------------------|------------------------|----------------|----------|------------------------------------------|
| PanRota-F1570  | TAYACIGAYGTITCICARTGGGA    | 1570-1593 <sup>a</sup> | VP1            | +        | Heminested RT-PCR, 1 <sup>st</sup> round |
| PanRota-R1922  | GCGTAGTTGTCGTCICCRTCBAC    | 1900-1922 <sup>a</sup> | VP1            | -        | 1 <sup>st</sup> and 2 <sup>nd</sup> rd   |
| PanRota-F1585a | CARTGGGATTCGTCICAGCAYAAYAC | 1585-1610 <sup>a</sup> | VP1            | +        | 2 <sup>nd</sup> rd                       |
| PanRota-F1585b | CARTGGGACGCCAGICAACATAAYAC | 1585-1610 <sup>a</sup> | VP1            | +        | 2 <sup>nd</sup> rd                       |

994  
995 ID, identification; RT-PCR, reverse transcription–PCR; <sup>a</sup>corresponding to Rotavirus A  
996 G11P[25] Dhaka6 VP1 (GenBank # EF560705); Variant forms of primers (marked  
997 consecutively with an alphabetic character in the last position) were mixed together  
998 equally and from then on treated as one single primer.

999 **Table S2.** Taxonomical annotation, sampling time and location, RVA PCR detection of  
1000 the bat samples

| Order-Family                         | Species                             | No. of samples per sampling site and year |          |          |          |          |          |          |          | PCR positive (%) | Positive samples (ID)                                                                    |
|--------------------------------------|-------------------------------------|-------------------------------------------|----------|----------|----------|----------|----------|----------|----------|------------------|------------------------------------------------------------------------------------------|
|                                      |                                     | total                                     | BGR 2008 | BGR 2009 | CRC 2010 | GAB 2009 | DEU 2008 | GHA 2009 | ROU 2008 |                  |                                                                                          |
| Chiroptera-Pteropodidae              | <i>Eidolon helvum</i>               | 226                                       |          |          |          |          |          | 226      |          | 1 (0.4%)         | K212                                                                                     |
|                                      | <i>Micropteropus pusillus</i>       | 1                                         |          |          |          |          |          | 1        |          | 0 (0%)           |                                                                                          |
|                                      | <i>Rousettus aegyptiacus</i>        | 10                                        |          |          |          | 8        |          | 2        |          | 0 (0%)           |                                                                                          |
| Chiroptera-Rhinolophidae             | <i>Rhinolophus blasii</i>           | 90                                        | 82       | 8        |          |          |          |          |          | 1 (1.1%)         | BB89-15                                                                                  |
|                                      | <i>Rhinolophus euryale</i>          | 336                                       | 244      | 92       |          |          |          |          |          | 2 (0.6%)         | BBR89-2, BR89-60                                                                         |
|                                      | <i>Rhinolophus ferrum-equinum</i>   | 52                                        | 45       | 6        |          |          |          |          | 1        | 0 (0%)           |                                                                                          |
|                                      | <i>Rhinolophus hipposideros</i>     | 6                                         | 6        |          |          |          |          |          |          |                  |                                                                                          |
|                                      | <i>Rhinolophus landeri</i>          | 1                                         |          |          |          |          |          |          | 1        | 0 (0%)           |                                                                                          |
|                                      | <i>Rhinolophus mehelyi</i>          | 22                                        | 14       | 8        |          |          |          |          |          | 0 (0%)           |                                                                                          |
| Chiroptera-Hipposideridae            | <i>Rhinolophus spec.</i>            | 6                                         |          |          |          | 6        |          |          |          | 0 (0%)           |                                                                                          |
|                                      | <i>Hipposideros cf ruber/caffer</i> | 183                                       |          |          |          | 46       |          | 137      |          | 2 (1.1%)         | GKS-637, GKS-660                                                                         |
|                                      | <i>Hipposideros cf spec</i>         | 2                                         |          |          |          |          |          | 2        |          | 0 (0%)           |                                                                                          |
|                                      | <i>Hipposideros gigas</i>           | 67                                        |          |          |          | 67       |          |          |          | 10 (14.9%)       | GKS-897, GKS-912, GKS-926, GKS-929, GKS-934, GKS-941, GKS-942, GKS-953, GKS-954, GKS-955 |
|                                      | <i>Hipposideros abae</i>            | 62                                        |          |          |          |          |          | 62       |          | 0 (0%)           |                                                                                          |
| Chiroptera-Nycteridae                | <i>Nycteris spec.</i>               | 3                                         |          |          |          |          |          | 3        |          | 0 (0%)           |                                                                                          |
| Chiroptera-Emballonuridae            | <i>Coleura afra</i>                 | 5                                         |          |          |          |          |          | 5        |          | 0 (0%)           |                                                                                          |
|                                      | <i>Peropteryx kappleri</i>          | 5                                         |          |          | 5        |          |          |          |          | 0 (0%)           |                                                                                          |
| Chiroptera-Phyllostomidae            | <i>Anoura geoffroyi</i>             | 100                                       |          |          | 100      |          |          |          |          | 0 (0%)           |                                                                                          |
|                                      | <i>Carollia castanea</i>            | 1                                         |          |          | 1        |          |          |          |          | 0 (0%)           |                                                                                          |
|                                      | <i>Carollia perspicillata</i>       | 203                                       |          |          | 203      |          |          |          |          | 1 (0.5 %)        | KCR10-93                                                                                 |
|                                      | <i>Enchisthenes hartii</i>          | 3                                         |          |          | 3        |          |          |          |          | 0 (0%)           |                                                                                          |
|                                      | <i>Glossophaga commissarisi</i>     | 3                                         |          |          | 3        |          |          |          |          | 0 (0%)           |                                                                                          |
|                                      | <i>Glossophaga soricina</i>         | 22                                        |          |          | 22       |          |          |          |          | 0 (0%)           |                                                                                          |
| Chiroptera-Mormoopidae               | <i>Pteronotus parnellii</i>         | 21                                        |          |          | 21       |          |          |          |          | 0 (0%)           |                                                                                          |
| Chiroptera-Natalidae                 | <i>Natalus lanatus</i>              | 3                                         |          |          | 3        |          |          |          |          | 0 (0%)           |                                                                                          |
| Chiroptera-Vespertilionidae          | <i>Barbastella barbastellus</i>     | 13                                        | 12       |          |          |          |          |          | 1        | 0 (0%)           |                                                                                          |
|                                      | <i>Miniopterus inflatus</i>         | 2                                         |          |          |          | 2        |          |          |          | 0 (0%)           |                                                                                          |
|                                      | <i>Miniopterus schreibersii</i>     | 77                                        | 39       |          |          |          |          |          | 38       | 0 (0%)           |                                                                                          |
|                                      | <i>Myotis brandtii</i>              | 17                                        |          |          |          |          | 17       |          |          | 0 (0%)           |                                                                                          |
|                                      | <i>Myotis alcaethoe</i>             | 2                                         | 2        |          |          |          |          |          |          | 0 (0%)           |                                                                                          |
|                                      | <i>Myotis bechsteinii</i>           | 57                                        | 32       |          |          |          | 25       |          |          | 0 (0%)           |                                                                                          |
|                                      | <i>Myotis capaccini</i>             | 1                                         | 1        |          |          |          |          |          |          | 0 (0%)           |                                                                                          |
|                                      | <i>Myotis dasycneme</i>             | 149                                       |          |          |          |          | 149      |          |          | 0 (0%)           |                                                                                          |
|                                      | <i>Myotis daubentonii</i>           | 110                                       | 7        |          |          |          | 103      |          |          | 1 (0.9%)         | SW78-39                                                                                  |
|                                      | <i>Myotis emarginatus</i>           | 5                                         | 5        |          |          |          |          |          |          | 0 (0%)           |                                                                                          |
|                                      | <i>Myotis myotis</i>                | 77                                        | 3        |          |          |          | 60       |          | 14       | 0 (0%)           |                                                                                          |
|                                      | <i>Myotis mystacinus</i>            | 51                                        |          |          |          |          | 51       |          |          | 0 (0%)           |                                                                                          |
|                                      | <i>Myotis nattereri</i>             | 27                                        | 2        |          |          |          | 25       |          |          | 0 (0%)           |                                                                                          |
|                                      | <i>Myotis oxygnathus</i>            | 22                                        | 1        |          |          |          |          |          | 21       | 0 (0%)           |                                                                                          |
|                                      | <i>Nyctalus leisleri</i>            | 3                                         | 3        |          |          |          |          |          |          | 0 (0%)           |                                                                                          |
| <i>Nyctalus noctula</i>              | 11                                  |                                           |          |          |          | 2        |          | 9        | 0 (0%)   |                  |                                                                                          |
| <i>Pipistrellus cf nanus/nanulus</i> | 3                                   |                                           |          |          |          |          | 3        |          | 0 (0%)   |                  |                                                                                          |

|                                   |                                  |             |            |            |            |            |            |            |           |                  |  |
|-----------------------------------|----------------------------------|-------------|------------|------------|------------|------------|------------|------------|-----------|------------------|--|
|                                   | <i>Pipistrellus nathusii</i>     | 2           |            |            |            |            | 2          |            |           | 0 (0%)           |  |
|                                   | <i>Pipistrellus pipistrellus</i> | 37          |            |            |            |            | 37         |            |           | 0 (0%)           |  |
|                                   | <i>Pipistrellus pygmaeus</i>     | 29          | 2          |            |            |            | 27         |            |           | 0 (0%)           |  |
|                                   | <i>Pipistrellus spec.</i>        | 6           |            |            |            |            |            | 6          |           | 0 (0%)           |  |
|                                   | <i>Plecotus auritus</i>          | 5           | 2          |            |            |            | 3          |            |           | 0 (0%)           |  |
|                                   | <i>Plecotus austriacus</i>       | 1           |            |            |            |            | 1          |            |           | 0 (0%)           |  |
| <b>Chiroptera-<br/>Molossidae</b> | <i>Mops spec.</i>                | 2           |            | 1          |            |            |            | 1          |           | 0 (0%)           |  |
|                                   | <b>Total (46 species)</b>        | <b>2142</b> | <b>502</b> | <b>115</b> | <b>361</b> | <b>129</b> | <b>502</b> | <b>449</b> | <b>84</b> | <b>18 (0.8%)</b> |  |

1001  
1002

Country: BGR = Bulgaria; CRC = Costa Rica; GAB = Gabon; DEU = Germany; GHA = Ghana; ROU = Romania

1003 **Table S3.** RVA-positive bat samples detected by targeted RT-PCR and undergone viral  
 1004 metagenomics

| Sample   | Host                          | Country    | Place            | Year |
|----------|-------------------------------|------------|------------------|------|
| BBR89-2  | <i>Rhinolophus euryale</i>    | Bulgaria   | Bratanova        | 2008 |
| BB89-15  | <i>Rhinolophus blasii</i>     |            | Elenas Cave      |      |
| BR89-60  | <i>Rhinolophus euryale</i>    |            | Roman Horse Cave |      |
| SW78-39  | <i>Myotis daubentonii</i>     | Germany    | Wahlstorf, SH    | 2008 |
| GKS-660  | <i>Hipposideros caffer</i>    | Gabon      | Zadie            | 2009 |
| GKS-637  |                               |            |                  |      |
| GKS-897  | <i>Hipposideros gigas</i>     | Gabon      | Faucon           | 2009 |
| GKS-912  |                               |            |                  |      |
| GKS-926  |                               |            |                  |      |
| GKS-929  |                               |            |                  |      |
| GKS-934  |                               |            |                  |      |
| GKS-941  |                               |            |                  |      |
| GKS-942  |                               |            |                  |      |
| GKS-953  |                               |            |                  |      |
| GKS-954  |                               |            |                  |      |
| GKS-955  |                               |            |                  |      |
| K212     | <i>Eidolon helvum</i>         | Ghana      | Kumasi           | 2009 |
| KCR10-93 | <i>Carollia perspicillata</i> | Costa Rica | Orosi            | 2010 |

1005

1006 **Table S4.** a. Examples of reassortments among bat RVA strains. b. Examples of distinct  
 1007 RVA genotype constellations in the same bat species. c. Examples of bat RVA strains  
 1008 with unusual genotype constellations, potentially resulting from (multiple) reassortment  
 1009 events  
 1010

| <b>a.</b> | Strains                            | VP7 | VP4   | VP6 | VP1 | VP2 | VP3 | NSP1 | NSP2 | NSP3 | NSP4 | NSP5 | Host Species                    | Host Family      | Diet |
|-----------|------------------------------------|-----|-------|-----|-----|-----|-----|------|------|------|------|------|---------------------------------|------------------|------|
|           | RVA/Bat-wt/BGR/BB89-15/2008/G3P[3] | G3  | P[3]  | I3  | R3  | C3  | M3  | A9   | N3   | T3   | E3   | H6   | <i>Rhinolophus blasii</i>       | Rhinolophidae    | I    |
|           | RVA/Bat-wt/BGR/BB89-60/2008/G3P[3] | G3  | P[3]  | I3  | R3  | C3  | M3  | A9   | N3   | T3   | E3   | H6   | <i>Rhinolophus euryale</i>      | Rhinolophidae    | I    |
|           | RVA/Bat-wt/CHN/LZHP2/2015/G3P[3]   | G3  | P[3]  | I3  | R3  | C3  | M3  | A9   | N3   | T3   | E3   | H6   | <i>Hipposideros pomona</i>      | Hipposideridae   | I    |
|           | RVA/Bat-tc/CHN/MSLH14/2012/G3P[3]  | G3  | P[3]  | I8  | R3  | C3  | M3  | A9   | N3   | T3   | E3   | H6   | <i>Rhinolophus hipposideros</i> | Rhinolophidae    | I    |
|           | RVA/Bat-tc/CHN/MYAS33/2013/G3P[10] | G3  | P[10] | I8  | R3  | C3  | M3  | A9   | N3   | T3   | E3   | H6   | <i>Aselliscus stoliczkanus</i>  | Hipposideridae   | I    |
|           | RVA/Bat-wt/CHN/BSTM70/2015/G3P[3]  | G3  | P[3]  | I8  | R3  | C3  | M3  | A29  | N3   | T3   | E3   | H6   | <i>Taphozous melanopogon</i>    | Emballonuridae   | I/F  |
|           | RVA/Bat-wt/CHN/YSSK5/2015/G3P[3]   | G3  | P[3]  | I8  | R20 | C2  | M1  | A9   | N3   | T3   | E3   | H6   | <i>Scotophilus kuhlii</i>       | Vespertilionidae | I    |

1011

| <b>b.</b> | Strains                              | VP7 | VP4   | VP6 | VP1 | VP2 | VP3 | NSP1 | NSP2 | NSP3 | NSP4 | NSP5 | Host Species          | Host Family  | Diet |
|-----------|--------------------------------------|-----|-------|-----|-----|-----|-----|------|------|------|------|------|-----------------------|--------------|------|
|           | RVA/Bat-wt/CMR/BatLy17/2014/G30P[47] | G30 | P[47] | I22 | R15 | C15 | M14 | A25  | N15  | T17  | E22  | H17  | <i>Eidolon helvum</i> | Pteropodidae | F    |
|           | RVA/Bat-wt/GHA/K212/2009/G30P[47]    | G30 | P[47] | I22 | R15 | C15 | M14 | A25  | N15  | T17  | E22  | H17  | <i>Eidolon helvum</i> | Pteropodidae | F    |
|           | RVA/Bat-wt/CMR/BatLy03/2014/G25P[43] | G25 | P[43] | I15 | R16 | C8  | M15 | A26  | N8   | T11  | E23  | H10  | <i>Eidolon helvum</i> | Pteropodidae | F    |
|           | RVA/Bat/SAU/KSA402/2012/G25P[43]     | G25 | P[43] | I15 | R16 | C8  | M15 | A26  | N8   | T11  | E23  | H10  | <i>Eidolon helvum</i> | Pteropodidae | F    |

1012

| <b>c.</b> | Strains                             | VP7 | VP4   | VP6 | VP1 | VP2 | VP3 | NSP1 | NSP2 | NSP3 | NSP4 | NSP5 | Host Species                 | Host Family      | Diet |
|-----------|-------------------------------------|-----|-------|-----|-----|-----|-----|------|------|------|------|------|------------------------------|------------------|------|
|           | RVA/Bat-wt/ZMB/LUS12-14/2012/G3P[3] | G3  | P[3]  | I3  | R2  | C2  | M3  | A9   | N2   | T3   | E2   | H3   | <i>Rhinolophus simulador</i> | Rhinolophidae    | I    |
|           | RVA/Bat-wt/CHN/YSSK5/2015/G3P[3]    | G3  | P[3]  | I8  | R20 | C2  | M1  | A9   | N3   | T3   | E3   | H6   | <i>Scotophilus kuhlii</i>    | Vespertilionidae | I    |
|           | RVA/Bat/KEN/322/Kwale/2015/G3P[10]  | G3  | P[10] | I2  | R8  | C3  | M5  | A5   | N3   | T6   | E3   | H6   | <i>Taphozous mauritanus</i>  | Emballonuridae   | I    |



1013

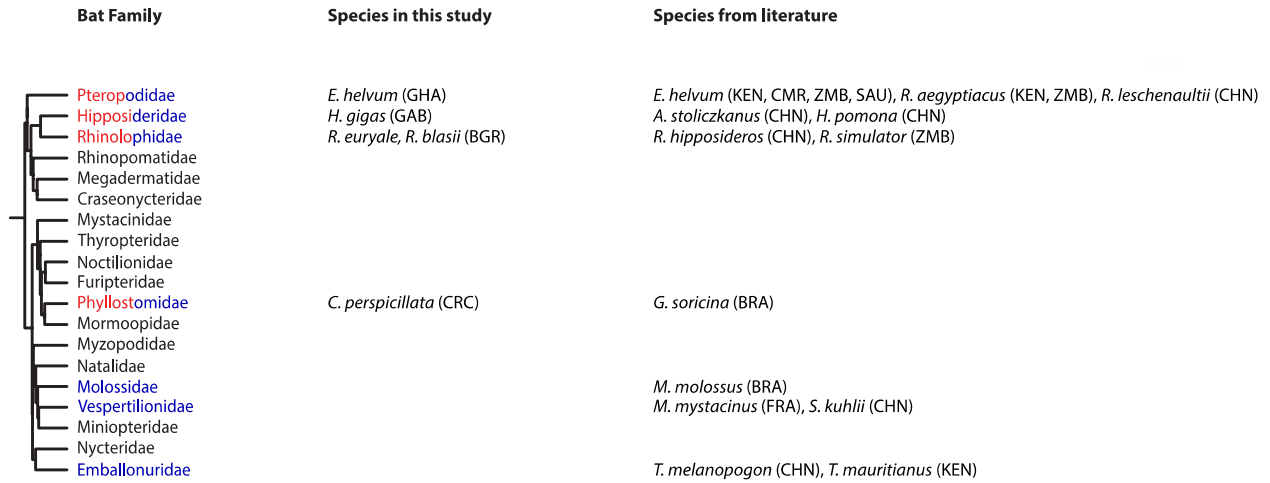

1014  
 1015 **Figure S1.** RVA-positive bat families and species. The RVA-positive bat families  
 1016 reported in the present study (red) and in literature (blue) are shown on the phylogenetic  
 1017 tree adapted from Simmons et al (2003). No RVA is reported in families in black. A family  
 1018 is accepted positive for the literature group if more than 1 RVA segment was submitted  
 1019 to GenBank. The corresponding bat species and the country of sample collection are  
 1020 also displayed. Country: GHA = Ghana, FRA = France, BRA = Brazil, ZMB = Zambia,  
 1021 SAU = Saudi Arabia, CRC = Costa Rica, KEN = Kenya, CHN = China, BGR = Bulgaria,  
 1022 GAB = Gabon

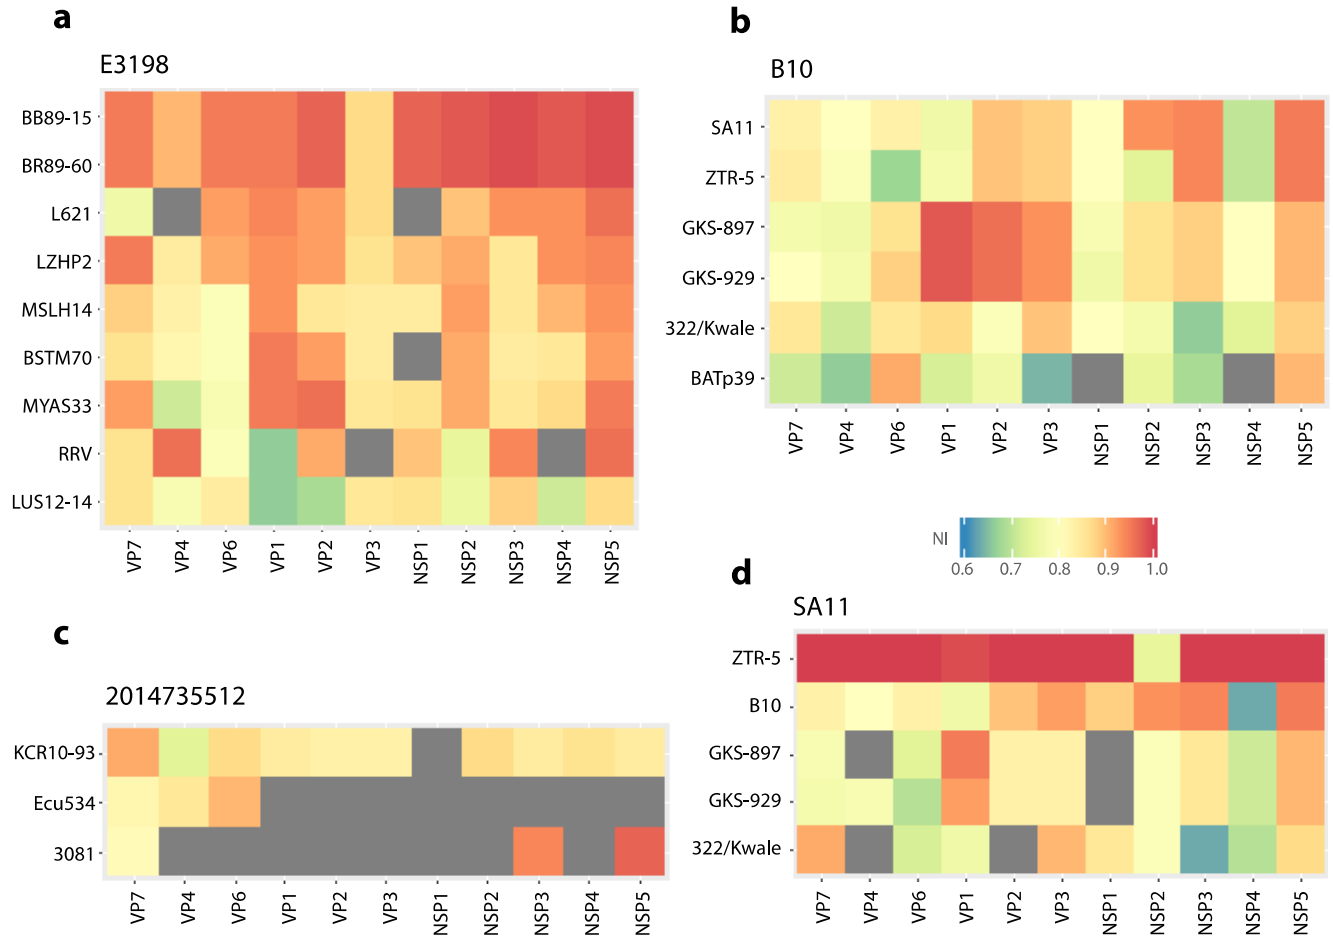

1023  
1024  
1025 **Figure S2.** Heatmap of pairwise nucleotide identities (NI) of the unusual RVA strains:  
1026 E3198 (a), B10 (b), 2014735512 (c), SA11 (d). Grey colour indicates the nucleotide  
1027 identities below 0.6 or lack of sequence information for the compared strain

1028 **Supplementary Material and Methods**

1029

1030 **Screening VP1-Consensus-PCR**

1031 25- $\mu$ L SuperScript<sup>®</sup> III with Platinum<sup>®</sup> Taq DNA Polymerase One-Step RT-PCR

1032 reactions as described by the manufacturer (INVITROGEN, Karlsruhe, Germany) used

1033 800 nM each of 1<sup>st</sup>-round primers, 1  $\mu$ g bovine serum albumin, MgSO<sub>4</sub> up to a total

1034 concentration of 2.4 mM, plus 5  $\mu$ L RNA extract. Amplification involved 30 min at 48°C;

1035 3 min at 95°C; 10 cycles of 20 s at 95°C, 20 s starting at 60°C with a decrease of 1°C

1036 per cycle, and 35 s at 72°C; 40 cycles of 20 s at 95°C, 20 s at 50°C, and 35 s at 72°C;

1037 and a final elongation step of 2 min at 72°C. 50- $\mu$ L Platinum Taq reactions as described

1038 by the manufacturer (INVITROGEN, Karlsruhe, Germany) used 2  $\mu$ L of 1st-round PCR

1039 product, 2 mM MgCl<sub>2</sub> and 800 nM of 2<sup>nd</sup>-round forward primer and 400 nM of the reverse

1040 primer. Amplification involved 3 min at 95°C; 10 cycles of 15 s at 95°C, 15 s starting at

1041 62°C with a decrease of 1°C per cycle, and 30 s at 72°C; 40 cycles 15s at 95°C, 15 s at

1042 52°C and 30 s at 72°C; and a final elongation step of 2 min at 72°C. All PCR reactions

1043 were carried out in an Eppendorf Mastercycler ep gradient S (Eppendorf AG, Hamburg,

1044 Germany).

1045

1046 **Pairwise nucleotide identity heatmap**

1047 The calculated pairwise nucleotide identities were represented in heatmaps using the

1048 ggplot2 package in R software.

1049
