1 **At least seven distinct rotavirus genotype constellations in bats with evidence of**  
2 **reassortment and zoonotic transmissions**

3

4 Ceren Simsek<sup>a</sup>; Victor Max Corman<sup>b,o</sup>; Hermann Ulrich Everling<sup>c</sup>; Alexander N.  
5 Lukashev<sup>d</sup>; Andrea Rasche<sup>b,o</sup>; Gael Darren Maganga<sup>e,f</sup>; Tabea Binger<sup>i</sup>; Daan Jansen<sup>a</sup>;  
6 Leen Beller<sup>a</sup>; Ward Deboutte<sup>a</sup>; Florian Gloza-Rausch<sup>g</sup>; Antje Seebens-Hoyer<sup>g</sup>; Stoian  
7 Yordanov<sup>h</sup>; Augustina Sylverken<sup>i,j</sup>; Samuel Oppong<sup>j</sup>; Yaw Adu Sarkodie<sup>j</sup>; Peter Vallo<sup>k</sup>;  
8 Eric M. Leroy<sup>l</sup>; Mathieu Bourgarel<sup>m,n</sup>; Kwe Claude Yinda<sup>a\*</sup>; Marc Van Ranst<sup>a</sup>; Christian  
9 Drosten<sup>b,o</sup>; Jan Felix Drexler<sup>b,o#</sup>; Jelle Matthijnsens<sup>a#</sup>

10

11 <sup>a</sup> KU Leuven - University of Leuven, Department of Microbiology, Immunology and  
12 Transplantation, Rega Institute for Medical Research, Leuven, Belgium

13 <sup>b</sup> Charité-Universitätsmedizin Berlin, corporate member  
14 of Freie Universität Berlin, Humbolt-Universität zu Berlin and Berlin Institute of Health,  
15 Institute of Virology, 10117 Berlin, Germany

16 <sup>c</sup> Institute of Virology, University of Bonn Medical Centre, Bonn, Germany

17 <sup>d</sup> Sechenov University, Moscow, Russia

18 <sup>e</sup> Centre International de Recherches Médicales de Franceville, Franceville, Gabon

19 <sup>f</sup> Université des Sciences et Technique de Masuku, Institut National d'Agronomie et de  
20 Biotechnologies, Franceville, Gabon

21 <sup>g</sup> Noctalis, Centre for Bat Protection and Information, Bad Segeberg, Germany

22 <sup>h</sup> Forestry Board Directorate of Strandja Natural Park, Malko Tarnovo, Bulgaria

23 <sup>i</sup> Kumasi Centre for Collaborative Research in Tropical Medicine (KCCR), Kumasi,  
24 Ghana

25 <sup>j</sup> Kwame Nkrumah University of Science and Technology, Kumasi, Ghana

26 <sup>k</sup> Institute of Vertebrate Biology, Academy of Sciences of the Czech Republic, v.v.i.,

27 Brno

28 <sup>l</sup> Institut de Recherche pour le Développement, UMR 224 (MIVEGEC),

29 IRD/CNRS/Montpellier University, Montpellier, France

30 <sup>m</sup> CIRAD, UMR ASTRE, Harare, Zimbabwe

31 <sup>n</sup> ASTRE, Montpellier University, CIRAD, INRA, Montpellier, France

32 <sup>o</sup> German Centre for Infection Research (DZIF), associated partner Charité

33 Universitätsmedizin Berlin, 10117 Berlin, Germany

34

35 **Running title:** Genetic diversity of bat rotaviruses

36

37 <sup>#</sup>Address correspondence to Jelle Matthijnssens, [jelle.matthijnssens@kuleuven.be](mailto:jelle.matthijnssens@kuleuven.be); Jan

38 [Felix Drexler: felix.drexler@charite.de](mailto:Felix Drexler: felix.drexler@charite.de)

39

40 Ceren Simsek, Victor Max Corman and Hermann Ulrich Everling contributed equally to

41 this work. Author order was determined on mutual agreement.

42

43 <sup>\*</sup>Present address: Laboratory of Virology, Rocky Mountain Laboratories, Division of

44 Intramural Research, National Institute of Allergy and Infectious Diseases, National

45 Institutes of Health, Hamilton, Montana, USA

46

47 Abstract: 236 words

48 Text: 4037 words

49 **ABSTRACT**

50 Bats host many viruses pathogenic to humans, and increasing evidence suggests that  
51 Rotavirus A (RVA) also belongs to this list. Rotaviruses cause diarrheal disease in many  
52 mammals and birds, and their segmented genomes allow them to reassort and increase  
53 their genetic diversity. Eighteen out of 2,142 bat fecal samples (0.8%) collected from  
54 Europe, Central America and Africa were PCR-positive for RVA and 11 of those were  
55 fully characterized using viral metagenomics. Upon contrasting their genomes with  
56 publicly available data, at least 7 distinct bat RVA genotype constellations (GCs) were  
57 identified, including evidence of reassortments and 6 novel genotypes. Some of these  
58 constellations are spread across the world, whereas others appear to be geographically  
59 restricted. Our analyses also suggest that several unusual human and equine RVA  
60 strains might be of bat RVA origin, based on their phylogenetic clustering, despite  
61 varying levels of nucleotide sequence identities between them. Although SA11 is one of  
62 the most widely used reference strains for RVA research and forms the backbone of a  
63 reverse genetics system, its origin remained enigmatic. Remarkably, the majority of the  
64 genotypes of SA11-like strains were shared with Gabonese bat RVAs, suggesting a  
65 potential common origin. Overall, our findings suggest an underexplored genetic  
66 diversity of RVAs in bats, which is likely only the tip of the iceberg. Increasing contact  
67 between humans and bat wildlife will further increase the zoonosis risk, which warrants  
68 closer attention to these viruses.

69

70 **Importance**

71 The increased research on bat coronaviruses after SARS-CoV and MERS-CoV allowed  
72 the very rapid identification of SARS-CoV-2. This is an excellent example of the

73 importance of knowing viruses harbored by wildlife in general and bats in particular, for  
74 global preparedness against emerging viral pathogens. The current effort to characterize  
75 bat rotavirus strains from 3 continents shed light on the vast genetic diversity of  
76 rotaviruses and also hinted at a bat origin for several atypical rotaviruses in humans and  
77 animals, implying that zoonoses of bat rotaviruses might occur more frequently than  
78 currently realized.

79

80

81 **Keywords:** Viral metagenomics, bat rotavirus, rotavirus genetic diversity, SA11,  
82 zoonosis

83

84

### 85 **Author Contributions**

86 C.D, J.F.D, J.M and M.V.R designed the research; V.M.C., H.U.E., A.N.L., A.R., G.D.M.,  
87 T.B., F.G.R., A.SH., S.Y., A.S, S.O., Y.A.S., P.V., M.B. and E.M.L. were involved in  
88 sample collection; V.M.C., H.U.E., A.N.L. and C.S. performed the research; C.S., D.J.,  
89 L.B., W.D., H.U.E., V.M.C. and K.C.Y. contributed in data analysis; J.F.D., C.D., C.S.  
90 and J.M. drafted the paper; final version was approved by all co-authors.

91

## 92 INTRODUCTION

93 Rotaviruses are the leading cause of diarrheal disease in the young of mammals and  
94 birds. In humans, rotaviruses are responsible for 122,000-216,000 deaths in under 5-  
95 year old infants on a yearly basis, mainly in developing countries (1). The *Rotavirus*  
96 genus belongs to the family *Reoviridae* and contains 9 species designated as A-I (RVA-  
97 RVI). The rotavirus genome consists of 11 dsRNA segments encoding 6 structural viral  
98 proteins (VP1-6) and 6 non-structural proteins (NSP1-6) (2).

99 The RVA outer capsid antigens, VP4 and VP7 are used for a dual classification system  
100 defining P-genotype (VP4 is Protease sensitive) and G-genotype (VP7 is Glycosylated),  
101 respectively (2). However, as gene reassortment is a common phenomenon for viruses  
102 with a segmented genome after co-infection, a more comprehensive classification  
103 approach became necessary to better account for the genome evolution and genetic  
104 diversity of RVAs. In 2008, a nucleotide sequence-based, complete genome  
105 classification system was developed for RVA, define genotypes for each of the 11 gene  
106 segment. These genotypes allowed extending the dual classification to full 'genotype  
107 constellations' classification (3, 4). The gene assignments are reported as Gx-P[x]-Ix-Rx-  
108 Cx-Mx-Ax-Nx-Tx-Ex-Hx, where 'x' denotes the particular genotype. The Rotavirus  
109 Classification Working Group (RCWG) was formed in order to assign new genotypes to  
110 rotavirus genes which could not be assigned to an established genotype (5).

111 Accumulating whole genome sequencing data demonstrate that there are typical GCs  
112 present in most animal species. Two of them, Wa-like and DS-1-like, are responsible for  
113 most of the human disease and designated as I1-R1-C1-M1-A1-N1-T1-E1-H1 and I2-  
114 R2-C2-M2-A2-N2-T2-E2-H2, respectively, for the non-G/P genotypes (3). Furthermore,  
115 various animal species are known to have specific GCs such as I2-R2-C2-M2-

116 A3/A11/A13-N2-T6-E2-H3 for cattle and other even-toed ungulates (6), I1/I5-R1-M1-  
117 A1/A8-N1-T1/T7-E1-H1 for swine (3, 7), I2/I6-R2-C2-M3-A10-N2-T3-E2/E12-H7 for  
118 horses (8), and I3-R3-C3-M3-A3/A9-N2-T3-E3-H3/H6 for cats and dogs (9). Partially  
119 shared genotype patterns between established GCs, such as Wa-like human RVA  
120 strains and porcine RVAs, as well as DS-1-like human RVA strains and bovine RVAs,  
121 suggest a common origin and important zoonotic transfer events in the past (3).  
122 Bats belong to the Chiroptera order, which is the second largest order of mammals (10).  
123 They harbor a high diversity of viruses, among them are also zoonotic viruses such as  
124 lyssavirus, Hendra and Nipah viruses, filovirus and several coronaviruses (11–17).  
125 Given their great population densities, migration ability and proximity to human habitats,  
126 bats are often screened for emerging and re-emerging viral pathogens (18, 19). Such  
127 screenings have resulted in the sporadic identification of rotavirus strains in bats in the  
128 last decade. Even though there are reports of RVH in South Korean bats (20) and  
129 Cameroonian bats (21), and a novel rotavirus species (tentatively named RVJ) was  
130 identified from Schreiber's bats in Serbia (22); RVA is the most commonly detected  
131 species and there are currently more than 20 bat RVA strains identified. In 2010, Esona  
132 and colleagues reported the first partially sequenced RVA strain (RVA/Bat-  
133 wt/KEN/KE4852/07/2007/G25P[6]) in a Kenyan *Eidolon helvum* (straw-colored fruit bat),  
134 and the majority of retrieved gene segments were only distantly related to known  
135 mammalian RVA strains (23). During the subsequent decade, sporadic and scattered  
136 reports have been published about RVA strains in bats collected from serum, gut and  
137 fecal samples in insectivorous and fruit bats. Several of these reports came from  
138 Chinese studies (24–27), but bat RVAs were also detected and (partially) characterized  
139 from France (28), Brazil (29), Zambia (30, 31), Cameroon (32), Kenya (33) and Saudi-

140 Arabia (34). These studies investigate samples from a variety of bat families such as  
141 Rhinolophidae (24, 30), Hipposideridae (25, 26), Vespertilionidae (26, 28), Molossidae,  
142 Phyllostomidae (29), Emballonuridae (26, 33), Pteropodidae (23, 31–34),  
143 Rhinopomatidae (34). From some of these novel bat RVA strains a few gene segments  
144 were sequenced, whereas other strains were sequenced completely, often resulting in  
145 one or multiple novel genotypes (23, 26, 29, 31, 32).

146 Even though RVAs are generally considered to have a rather restricted host range, a  
147 number of unusual strains have been described in literature, suggestive of interspecies  
148 transmissions involving bat RVA strains. One example is the RVA/Horse-  
149 wt/ARG/E3198/2008/G3P[3] strain that was isolated from a diarrheic foal in Argentina in  
150 2008 (35). Although its GC was distantly related to feline/canine-like RVA strains at that  
151 time, 2 more recent publications showed a closer relationship with Chinese bat RVA  
152 strains in several gene segments (24, 25). A second example was the unusual human  
153 G3P[3] RVA strain RVA/Human-wt/JPN/12638/2014/G3P[3], isolated from a 4 year-old  
154 child with severe gastroenteric symptoms in Japan. Three out of its 11 gene segments  
155 were closely related to a South African bat RVA strain, suggesting a reassortment  
156 involving a bat RVA strain (36). A third example are two unique G20 human RVA strains,  
157 RVA/Human-wt/ECU/Ecu534/2006/G20P[28] (37) and RVA/Human-  
158 wt/SUR/2014735512/2013/G20P[28] (38). The recent identification of the G20 genotype  
159 in a Brazilian bat RVA strain (RVA/Bat-wt/BRA/3081/2013/G20P[x]) also suggests a  
160 potential bat reservoir for these human strains (29).

161 All in all, slowly emerging data on bat RVA strains start to show that some unusual  
162 human and animal RVA strains might actually have been derived from bats. Therefore,  
163 the global surveillance of novel and reassortant RVA bat strains has to continue in order

164 to better understand the genetic diversity of bat RVA strains, as well as to maintain both  
165 public and animal health. Here we report identification of 11 bat RVA strains from  
166 Bulgaria, Gabon, Ghana and Costa Rica, suggesting evidence of multiple reassortment  
167 and host switching events from bats to bats and to other mammals.

168

## 169 **RESULTS & DISCUSSION**

170 Bats are known hosts of various human pathogens, including viruses such as rabies  
171 virus, henipaviruses, Marburg virus, SARS and MERS CoVs (11–17). In addition, there  
172 have been sporadic reports on several other RNA viruses in bats such as  
173 paramyxoviruses, picornaviruses, orthoreoviruses and astroviruses (39–42). Bat  
174 rotaviruses have also been sporadically reported during the last decade and it was  
175 rotavirus A (RVA) that has been the most frequently reported rotavirus species. This is  
176 not very surprising given the fact that RVA has been detected in a wide range of  
177 mammals and birds (43–45). Furthermore, there are plenty of examples of this enteric  
178 pathogen being capable of interspecies transmission in literature, sometimes in  
179 combination with reassortments, between various mammalian species including humans  
180 (46). In some occasions, such animal-derived gene segments (e.g. VP7 genotypes G8  
181 from cattle, G9 and presumably G12 from pigs) or complete GCs (AU-1 like strains from  
182 cats) have become established in the human population. This established circulation  
183 either happened in a limited geographical region (AU-1 like or G8) or worldwide; such as  
184 epidemiologically important human pathogenic G9 and G12 RVAs (47, 48).

185 In order to further investigate the potential of bat RVA strains to spill over between bats  
186 or towards other mammalian species, we investigated RVA strains from over 2,000 bats,  
187 spanning 5 countries in 3 continents. The bat fecal samples that were collected from



188 Bulgaria, Romania, Germany, Gabon, Ghana and Costa Rica were screened for RVA,  
189 using a nested RT-PCR targeting a short piece of the highly conserved polymerase  
190 gene (VP1, Table S1). This screening yielded 18 positives out of the 2,142 screened  
191 samples (0.8%) (Table S2). The RVA detection rate per species ranged from 0 to 1.1%,  
192 except for *H. gigas* (14.9%). The reason for this higher detection rate is unknown, but  
193 could be due to: 1) better matching oligonucleotides used for the detection, 2) an  
194 ongoing RVA outbreak in the sampled caves, or 3) higher circulation of enteropathogens  
195 in *H. gigas*. RVA positive samples were collected from five bat families Pteropodidae,  
196 Rhinolophidae, Hipposideridae, Phyllostomidae and Vespertilionidae, and they  
197 originated from all sampling sites except Romania.

198

### 199 **Eleven near complete bat RVA genomes, including 6 novel genotypes**

200 From 16 of the RVA positive samples, a sufficient amount of sample was available for  
201 complete viral genome sequencing using the NetoVIR protocol (Table S3). 118.9 million  
202 paired-end (PE) reads (2x150 base pairs) and an average of 7 million PE reads/sample  
203 were generated by Illumina sequencing (Table 1). Four samples from Gabon and 1  
204 sample from Germany did not yield any RVA contigs longer than 500 base pairs and  
205 were therefore not investigated further. From 11 samples near complete RVA genomes  
206 could be retrieved. These RVA samples belonged to 5 out of the 46 tested bat species  
207 (10.8%), from 4 out of the 10 (40%) tested families, as shown in the bat phylogenetic  
208 tree (Table S2, Figure S1). The percentage of reads mapping to RVA in each sample  
209 ranged from 0-90% (Table 1).

210 The GCs of the 11 bat RVA strains are shown in Table 2. The genotype assignments,  
211 including novel VP6 (I30), NSP1 (A36), NSP2 (N23) and NSP4 (E28) genotypes for

212 some of the Gabonese strains and NSP1 (A32) and NSP3 (T23) genotypes for the strain  
213 from Costa Rica were made according to the guidelines determined by the RCWG (49).  
214 Although the NSP5 gene segment of RVA/Bat-wt/CRC/KCR10-93/2010/G20P[47] most  
215 likely also represents a novel genotype, we were not able to retrieve the complete ORF  
216 (despite several attempts using RT-PCR and Sanger sequencing), which is required for  
217 the assignment of a novel genotype (50). Particular GCs were identified in different  
218 geographic locations (Table 2). Gabonese strains were similar to each other, with certain  
219 genotypes shared with the Bulgarian strains (G3, P[3], C3, M3, N3, T3 and E3).  
220 However, they do not cluster phylogenetically closely together (*vide supra*), indicating  
221 non-recent reassortment events. KCR10-93 also possessed a unique GC, except for the  
222 VP4 genotype P[47], which was shared with the Ghanaian strain. Interestingly, these 2  
223 VP4 genes were very closely related (*vide supra*), suggesting a recent reassortment  
224 event. Gabonese GKS-912, GKS-926 and GKS-934 appeared to have a co-infection, as  
225 multiple genotypes were identified in these samples for VP2, VP3, VP4, NSP2, NSP3  
226 and NSP4. For GKS-934, 2 near complete VP7 gene segments were identified, both  
227 belonging to the G3 genotype, yet having a substantial nucleotide level dissimilarity  
228 (19%, *vide infra*). This was also the case for K212 possessing 2 distinct M14 genotypes  
229 with 12% nucleotide sequence distance.

230

### 231 **At least 7 seven distinct bat RVA genotype constellations**

232 Even though most animal species, including humans, have a limited number of typical  
233 RVA GCs, the RVAs harbored by bats show a great genetic diversity. Combining our  
234 data with previously published bat RVA genomes showed that there are at least 7  
235 distinct bat RVA GCs circulating in the bat population (Table 3), ranging from completely

236 unique to partially overlapping with each other. The Bulgarian RVA/Bat-wt/BGR/BB89-  
237 15/2008/G3P[3] and RVA/Bat-wt/BGR/BR89-60/2008/G3P[3] strains were identical or  
238 very similar to MSLH14-like RVA strains from China and a partially sequenced strain  
239 from Brazil (“orange” GC in Table 3). Even though at least 3 of the samples from Gabon  
240 possessed more than one RVA strain, they possessed at least 3 distinct but related GCs  
241 (“purple” GC in Table 3), not previously identified in bats. RVA/Bat-  
242 wt/GHA/K212/2009/G30P[47] (“green” GC in Table 3) was identical or very similar to  
243 several previously identified Cameroonian bat RVA strains (32), as well as some  
244 partially sequenced bat RVA strains from Zambia (31). RVA/Bat-wt/CRC/KCR10-  
245 93/2010/G20P[47] had a distinct GC (“brown” GC in Table 3), including at least 2  
246 previously undescribed genotypes, and shared the G20 genotype with RVA/Bat-  
247 wt/BRA/3081/2013/G20P[x]. Of interest was the P[47] genotype, which was shared with  
248 2 African strains from the green GC. The “yellow” GC in Table 3 was composed of 2  
249 strains with identical genotypes; RVA/Bat-wt/CMR/BatLy03/2014/G25P[43] and  
250 RVA/Bat-wt/SAU/KSA402/2012/G25P[43], detected in Cameroon and Saudi Arabia,  
251 respectively, as well as the partially sequenced strain RVA/Bat-  
252 wt/KEN/KE4852/2007/G25P[6] from Kenya. Two GCs (indicated in “blue” and “dark  
253 grey” in Table 3) were only represented by a single bat strain from Kenya (RVA/Bat-  
254 wt/KEN/BATp39/2015/G36P[51]) and China (RVA/Bat-wt/CHN/GLRL1/2005/G33P[48]),  
255 respectively (Table 3).

256

### 257 **Reassortments among bat RVA strains**

258 Even though the GCs are somewhat conserved, there are ample examples for the  
259 occurrence of reassortments. In the orange GC, there are some unusual genotypes

260 such as P[10] for VP4, R20 for VP1 and A29 for NSP1 (Table S4a and S4b), which are  
261 most likely the results of reassortment events with currently unknown RVA strains (25,  
262 26). Reassortment also takes place between different bat RVA GCs, albeit to a limited  
263 extension. For example, RVA/Bat-wt/GAB/GKS-897/2009/G3P[3] is the only strain from  
264 the purple GC with the I8 VP6 genotype, which is shared with several strains from the  
265 orange GC (RVA/Bat-tc/CHN/MSLH14/2012/G3P[3], RVA/Bat-  
266 wt/CHN/BSTM70/2015/G3P[3], RVA/Bat-tc/CHN/MYAS33/2013/G3P[10] and RVA/Bat-  
267 wt/CHN/YSSK5/2015/G3P[3]), suggesting a reassortment event. A second example is  
268 the shared P[47] VP4 genotype between RVA/Bat-wt/GHA/K212/2009/G30P[47] and  
269 RVA/Bat-wt/CMR/BatLy17/2014/G30P[47] (green GC) and RVA/Bat-wt/CRC/KCR10-  
270 93/2010/G20P[47] (brown GC) (Table 2). Interestingly, these last 3 strains were 97-  
271 100% identical to each other on the nucleotide level for VP4, suggesting a recent  
272 reassortment event. Finally, there are also a few bat RVA strains with unusual genotype  
273 composition, which do not clearly fall into the 7 described GCs. RVA strains RVA/Bat-  
274 wt/ZMB/LUS12-14/2012/G3P[3] and RVA/Bat-wt/CHN/YSSK5/2015/G3P[3] possess  
275 several genotypes typical for the orange GC, in addition to several other genotypes of  
276 unknown origin (Table S4b). Finally, RVA/Bat-wt/KEN/322/Kwale/2015/G3P[10]  
277 possesses both genotypes typical to the orange and purple GCs, in addition to some  
278 atypical bat RVA genotypes.

279

## 280 **RVA interspecies transmission in bats and potential host range restriction**

281 As demonstrated by the orange GC, RVAs belonging to certain bat families might  
282 undergo multiple host switching events. The Bulgarian RVA strains were isolated from

283 rhinolophid bats, whereas the Chinese MSLH14-like strains were found in bats from the  
284 Rhinolophidae, Hipposideridae and Emballonuridae families (Table S4a).

285 In addition to RVAs potentially being able to infect multiple bat families, individual bat  
286 families could also harbor more than one GC, as is shown in Table S4c. Pteropodid bats  
287 harbor completely unique GCs (green and yellow), suggesting that the associated RVA  
288 strains have a high epidemiologic fitness in these populations. This further indicates that  
289 the Pteropodidae, which includes the straw-colored fruit bats, has been a substantial  
290 virus reservoir for a long time already, as also shown for Marburg virus, Hendra and  
291 Nipah viruses (12–14).

292

### 293 **Wide geographic dispersal of bat RVA GCs**

294 The global distribution of the bat RVA GCs revealed several patterns regarding RVA  
295 circulation in bats, as shown in Figure 1. Bat RVAs belonging to the brown, purple, blue  
296 and dark grey GCs have so far only been identified in Costa Rica (and perhaps Brazil),  
297 Gabon, Kenya and China, respectively. On the other hand, the green and yellow GCs  
298 were confirmed to be further dispersed, from Cameroon to Saudi Arabia (G25P[43]), and  
299 from Ghana and Cameroon to Zambia, respectively, as was previously suggested by  
300 Sasaki *et al.* (51). However, highly similar RVA strains belonging to the orange MSLH14-  
301 like GCs span at least 3 different continents and subcontinents, e.g. Asia, Europe and  
302 possibly Central America. Furthermore, it was also shown that RVA strains with distinct  
303 GCs could co-circulate in the same region, as is the case in Cameroon (green, yellow  
304 and purple GCs) and China (orange and dark grey GCs) (Figure 1).

305 With powered flight, migratory bats can travel long distances between summer and  
306 winter roosts, for foraging and searching for a mate (52). Among long-distance migratory

307 bats, *E. helvum* can cover a range of 270 to 2,500 km (53), vespertilionid ‘tree bats’ and  
308 the subtropical/tropical molossid bats can fly over 1,000 km (54, 55). Global distribution  
309 and intercontinental bat virus transfers are also typical to other bat viruses (56). In  
310 addition to migration across vast distances, the fact that some distinct GCs seem to  
311 have overlapping geographical ranges (such as in China and West Africa in Figure 1)  
312 suggest a fitness advantage for these particular genotypes occurring together. However,  
313 there is also ample evidence of gene reassortment events among established GCs (e.g.  
314 P[47] in green and brown GC; or I8 in purple and orange GC), or with RVA strains of  
315 currently unknown origin (e.g. A29, A15, E27).

316 It is clear that more bats should be sampled in order to have a comprehensive  
317 understanding of the driving and restricting forces of bat RVA genetic diversity, or the  
318 lack thereof. The detection of P[47] reassortment between Ghanaian and Costa Rican  
319 bat RVAs, which are located more than 9,000 km’s apart, cannot only be explained by  
320 the flight ability of bats, but rather the lack of sampling between these 2 locations. We  
321 hypothesize that with the increasing bat RVA sequencing efforts, the geographical and  
322 host range of most GCs (such as the blue, dark grey, yellow and brown) will be  
323 significantly expanded.

324

### 325 **Potential of interspecies transmissions of bat RVA to mammalian hosts**

326 We further investigated whether there is potential for unusual RVA strains detected in  
327 other mammals (including humans) to be a result of an interspecies transmission from  
328 bat strains identified in the current and other studies (Table 3).

329

330 *Likely transmission of bat RVA strains to a horse*

331 In 2013, Miño and colleagues reported an unusual Argentinian equine G3P[3] RVA  
332 strain RVA/Horse-wt/ARG/E3198/2008/G3P[3]. Based on the GC, it was speculated to  
333 have a common ancestor with both feline/canine RVA strains, as well as the unusual  
334 rhesus RVA strain RRV. However, the nucleotide identities were below the 90% for most  
335 of the genome segments, suggesting that the original host may not be identified yet (35).  
336 When more bat RVA genomes became available in subsequent years, Xia and  
337 colleagues, and later also Biao He and colleagues, suggested that E3198 might be of  
338 bat origin, based on the GCs and nucleotide similarities (25, 26). The close genetic  
339 relationship between E3198 and the Bulgarian strains presented here, across all 11  
340 gene segments, might further suggest a bat origin of this unusual equine RVA strain  
341 (Figures 2-4, Figure S2a, nucleotide similarities 87-97%).

342  
343 *Unexpected high similarities between bat and simian RVA strains*  
344 RVA strain RVA/Simian-tc/ZAF/SA11-H96/1958/G3P[2] was isolated from an overtly  
345 healthy vervet monkey and has subsequently been used extensively as a laboratory  
346 strain in RVA growth, virulence, genome replication and in recent years also a reverse  
347 genetics research (57–59). However, its origin remained obscure, as related strains  
348 were never identified in vervet monkeys or other non-human primates ever after. In  
349 2011, Ghosh and colleagues identified an unusual RVA strain RVA/Human-  
350 tc/KEN/B10/1987/G3P[2] from a child in Kenya, which shared 8 out of 11 genotypes  
351 with SA11-H96. They speculated about a simian or other animal origin of this strain (60).  
352 Around the same time, a second human RVA strain RVA/Human/CHN/ZTR-  
353 5/XXXX/G3P[2], nearly identical to SA11-H96 (Figure S2b) was deposited in GenBank  
354 as a potential vaccine candidate. However, the controversy about the origin of these



355 SA11-like strains (SA11-H96, B10 and ZTR-5) remained. To our surprise, the purple GC  
356 described in this paper, containing only the bat RVA strains from Gabon, showed up to  
357 seven genotypes in common with these SA11-like strains (Table 3), with varying  
358 degrees of nucleotide similarities (Figures S2b, c). According to phylogenetic analyses  
359 the bat RVAs from Gabon and Kenya clustered with B10 for the VP1, VP6, NSP4 gene  
360 segments, and with all 3 strains (B10, SA11-H96 and ZTR-5) for VP2-4, NSP1, NSP3  
361 and NSP5 (Figures 2-4).

362 Not only for SA11-H96, but also for RVA/Simian-tc/USA/RRV/1975/G3P[3] and  
363 RVA/Rhesus-tc/USA/TUCH/2002/G3P[24], some close relationships with bat RVA  
364 strains were noted. The VP1, VP3, VP4, VP6, VP7, NSP1-5 genes of RRV clustered  
365 closely with one or multiple bat and bat-related RVA strains (Figures 2-4). For TUCH,  
366 the VP1, NSP1, NSP5 gene segments also clustered close to bat RVA strains (Figures  
367 2-4).

368 The finding that the purple SA11-like GC was found in multiple bats in Gabon, and only  
369 on a single occasion in vervet monkeys and in 2 unrelated human cases, makes bats  
370 the prime suspect of being the major hosts of these viruses, making the monkey and  
371 humans strains putative examples of interspecies transmissions. It should however be  
372 noted that the phylogenetic clustering between these bat, simian and human strains is  
373 still rather variable, and the nucleotide similarities are not as high as between bat RVA  
374 strains and RVA/Horse-wt/ARG/E3198/2008/G3P[3] (Figure S2a, Figures 2-4),  
375 suggesting that more RVAs from currently unsampled animal species will likely cluster in  
376 between. However, 2 other bat strains are of further interest: 1) the bat RVA strain  
377 RVA/Bat/KEN/322/Kwale/2015/G3P[10] (only available as a GenBank entry at this point)  
378 seems to have a mixed GC possessing both characteristics of the orange and purple



379 GCs (Table 3). Especially, the purple genotypes R8, M5 and A5 of 322/Kwale are of  
380 interest as they are much more closely related to the SA11-like strains than the Gabon  
381 bat RVA strains (Figure 2); 2) the bat RVA strain RVA/Bat-  
382 wt/KEN/BATp39/2015/G36P[51] (only available in GenBank) possesses a single purple  
383 genotype I16, and again this is more closely related to the SA11-like strain B10  
384 compared to the Gabon RVA strains. Taken all together, we speculate that with further  
385 RVA screenings in bat populations, more bat RVA strains that are closely related to the  
386 vervet monkey RVA strain SA11-H96 and human SA11-like RVA strains may be  
387 detected.

388

#### 389 *Evidence of bat RVA strains transmitted to humans?*

390 The G3 genotype is usually associated with P[8] genotype in humans RVAs, and  
391 combinations such as G3P[3] and G3P[9] are only sporadically found in the human  
392 population (61). Nonetheless, in the 2000-2001 season, the VP4, VP7, VP6 and NSP4  
393 genes were sequenced from a rare human strain RVA/Human-  
394 wt/THA/CMH222/2001/G3P[3], detected in a 2 year-old severely diarrheic patient in  
395 Thailand (41). It was reported to have a VP7 gene closely related to RVA/Simian-  
396 tc/USA/RRV/1975/G3P[3] and a VP4 gene that was caprine-like. Subsequently, Xia and  
397 colleagues speculated that this strain is distinct from typical human RVA GCs and very  
398 likely shared a common ancestor with Asian bat RVAs (33). Our study provides further  
399 evidence for the bat origin of CMH222, as the VP6 I8 genotype of CMH222 is closely  
400 related to RVA/Bat-wt/GAB/GKS-897/2009/G3P[3] (Figure 3).

401 Later on, Wang and colleagues contributed to the list of unusual Southeast Asian human  
402 RVA strains. Possessing the G3P[9] genotypes, both the RVA/Human-

403 tc/CHN/L621/2006/G3P[9] and RVA/Human-wt/CHN/E2451/2011/G3P[9] strains were  
404 isolated from a symptomatic adult and a symptomatic child, respectively (62). Complete  
405 genome analyses revealed a high genetic relatedness to strains of feline/canine origin  
406 for almost all 11 genes. L621 and E2451 also clustered near the aforementioned  
407 unusual RVA/Horse-wt/ARG/E3198/2008/G3P[3] for the VP3, VP6, NSP2, NSP5 genes;  
408 and L621 additionally also clustered with the E3198 NSP3 gene. Here, we observed that  
409 these atypical Asian human strains were also closely related to the Bulgarian bat RVA  
410 strains for VP3, VP6, NSP2, NSP4, NSP5 and Gabonese bat strains for NSP2, NSP3,  
411 NSP4 of the orange GC (Figures 2-4). These additional findings further substantiate, as  
412 well as complicate the identification of the likely bat host, from which the L621 and  
413 E2451 strains likely jumped to humans.

414 Following these potential zoonosis reports, Esona and colleagues also revealed  
415 remarkable findings in Latin America in 2018, where only limited bat RVA information is  
416 present to date (38). A human strain RVA/Human-wt/SUR/2014735512/2013/G20P[28]  
417 was isolated in Suriname, and possessed a rare G20 genotype, which was also  
418 detected in an Ecuadorian human RVA strain (Ecu534) in 2006. Remarkably,  
419 2014735512 showed high similarities with bat strain RVA/Bat-  
420 wt/BRA/3081/2013/G20P[x] for the VP7, NSP3 and NSP5 genes (Figure S2d) and it was  
421 speculated to be of bat origin as these genotypes have not been detected in any other  
422 animal species so far. RVA/Bat-wt/CRC/KCR10-93/2010/G20P[47] also showed  
423 nucleotide similarities ranging from 82% to 92% with 2014735512 for 9 out of 11 gene  
424 segments, and also phylogenetically clustered together, albeit not very closely (Figures  
425 2-4). Even though more evidence is needed, this finding might indicate a bat RVA origin  
426 for this rare human RVA strain.

427

## 428 **Conclusion**

429 Despite the limited number of bat species that have been screened for rotaviruses, a  
430 surprisingly large genetic diversity of RVA strains is presented in this study, including 6  
431 novel genotypes. With increasing screening efforts, it is without a doubt that this diversity  
432 will expand both genetically and geographically. We also presented multiple examples of  
433 close genetic relatedness of several mammalian and bat rotaviruses. The indicated  
434 zoonoses has - to the best of our knowledge - always been restricted to sporadic cases  
435 so far and has never resulted in major outbreaks in humans. However, it is believed that  
436 the rotavirus genotype constellations currently circulating in humans also have a  
437 common ancestor with animal rotaviruses, highlighting that interspecies transmissions  
438 followed establishment in the human population could happen again (3).

439 Another notable finding is that several gene segments of bat RVA strains and the simian  
440 SA11 RVA strain (the latter being used in global rotavirus research for decades), have a  
441 common origin. Furthermore, SA11 strain has been recently used as the backbone of a  
442 RVA reverse genetics system, and is therefore likely to be used even more in the future.  
443 It would be intriguing to test whether or not SA11 grows well in bat cell lines, or in *in vivo*  
444 infection experiments.

445

## 446 **MATERIALS AND METHODS**

### 447 **Sample collection**

448 Fecal samples were collected from 2,142 bats from 10 bat families, representing 46 bat  
449 species (Table S2). Sample collection took place in Ghana, Gabon, Bulgaria, Romania,  
450 Germany and Costa Rica during 2008-2010 as part of investigations of other viruses in

451 bats, such as coronavirus, astrovirus, and picornavirus, as described previously (56, 63–  
452 66). Bat species were determined by trained field biologists. For European and Costa  
453 Rican studies, bats were caught with mist nets, put into cotton bags and fecal pellets are  
454 collected. Ghanaian fecal droppings were collected with plastic foil from the trees in  
455 which *E. helvum* bats were roosting. The pellets were kept in RNAlater RNA stabilization  
456 solution (QIAGEN, Hilden, Germany). Gabonese bats were also captured with mist nets  
457 just before twilight and were individually euthanized. Bat feces were collected with the  
458 corresponding permissions of the host countries in all of the studies.

459

#### 460 **RT-PCR rotavirus screening and viral metagenomics**

461 Viral RNA was isolated from the fecal specimens as described previously (65). To  
462 screen the RVA presence in bats, conserved RVA-specific primer pairs targeting the  
463 VP1 gene were used (277 nucleotide long PCR product) in a hemi-nested and single  
464 round reverse transcription (RT-PCR) assay (Table S1). Among the 18 positive  
465 specimens (Tables S2-S3), 16 fecal samples, of which sufficient material was left, were  
466 shipped to the Laboratory of Clinical and Epidemiological Virology, Leuven, Belgium on  
467 dry ice, for further complete genome analyses (Table 1).

468 The NetoVIR protocol was used for viral enrichment of the fecal suspensions as  
469 described before (67). Briefly, the fecal samples were suspended in dPBS and  
470 homogenized with a MINILYS homogenizer (Bertin Technologies) for 20s at 3,000 rpm.  
471 The homogenates were centrifuged for 3 min at 17,000 g and filtered with 0,8 µm PES  
472 filters (Sartorius). Filtrates were treated with benzonase (Novagen) and micrococcal  
473 nuclease (New England Biolabs) at 37 °C for 2 h to remove the free-floating nucleic  
474 acids. Subsequently, samples were extracted using the QIAamp Viral RNA Mini Kit

475 (Qiagen) according to the manufacturer's instructions, without addition of carrier RNA to  
476 the lysis buffer. Reverse transcription and second strand synthesis was performed by an  
477 adjusted version of the Whole Transcriptome Amplification (WTA2) protocol as  
478 described previously (Sigma-Aldrich) (68). Sequencing library was constructed with the  
479 Nextera XT Library Preparation Kit (Illumina). The size of the library was checked with  
480 Bioanalyzer (Agilent Technologies) with a High Sensitivity DNA chip and the 2nM pooled  
481 libraries were sequenced on an Illumina NextSeq 500 platform (2x150bp paired-end).

482

### 483 **Data analysis**

484 Low quality reads, ambiguous bases, primer and adapter sequences were removed from  
485 the paired-end reads with Trimmomatic v0.36 with default parameters (69). Trimmed  
486 reads were *de novo* assembled with metaSPAdes from SPAdes software v3.11.1 using  
487 21, 33, 55, 77 k-mer lengths (70). The obtained contigs were annotated with DIAMOND  
488 v0.9.10 against a non-redundant protein database (71). The contigs annotated as  
489 "Rotavirus" were further investigated using the nucleotide BLAST against a nucleotide  
490 reference database to identify the gene segments (72). The incomplete contigs were  
491 completed *in silico* by mapping the trimmed reads of corresponding samples against the  
492 reference sequence determined by the highest BLASTn nucleotide similarity with the  
493 lowest e-value using BWA software v0.5.9 (73) and SAMtools v1.6 (74). Open reading  
494 frames were determined by the web-based NCBI ORF Finder tool (75)  
495 ([www.ncbi.nlm.nih.gov/orffinder](http://www.ncbi.nlm.nih.gov/orffinder)).

496

### 497 **Assignment of GCs and phylogenetic analyses**

498 The genotypes were assigned using RotaC tool (<http://rotac.regatools.be>). The  
499 sequences whose genotypes could not be determined were sent to the RCWG for  
500 assignment of novel genotypes.

501 Reference strains were downloaded from Genbank in order to represent all the relevant  
502 genotypes per gene segment. Codon-based nucleotide level multiple sequence  
503 alignments were done using MUSCLE (76) with default parameters in MEGA software  
504 v7.0.26 (77). Pairwise nucleotide distances were calculated using number of identical  
505 residues in relation to the length of the alignment with bio3d package in R (78).  
506 Alignments were trimmed with trimAL v1.2 with automated1 parameter (79). Optimized  
507 number of bootstrap replicates (100 to 1000) were determined by the autoMRE option  
508 and maximum likelihood trees were reconstructed with RaxML-NG (80). GTR+G+I  
509 nucleotide substitution model is used for trees of all segments, except for NSP4 and  
510 NSP5, as they did not converge after 1000 bootstraps under the GTR+G+I model  
511 (TIM3+I+G and HKY+I+G, respectively). FigTree v1.4.3 from the BEAST package was  
512 used for phylogenetic tree visualization and manipulation (81). The GCs were illustrated  
513 on a world map using the maps package in R software (82).

514

### 515 **Data availability**

516 The data have been deposited with links to BioProject accession number  
517 PRJNA562472 in the NCBI BioProject database  
518 (<https://www.ncbi.nlm.nih.gov/bioproject/>). The data is also deposited to GenBank under  
519 the following accession numbers: MN433617-27 (BB89-15), MN539284-94 (BR89-60),  
520 MN528116-26 (GKS-897), MN477236-46 (GKS-912), MN528101-15 (GKS-926),  
521 MN528075-85 (GKS-929), MN528086-MN528100 (GKS-934), MN551587-97 (GKS-

522 941), MN477225-35 (GKS-954), MN551598-MN551608 (KCR10-93), MN567261-72  
523 (K212). Reference strains that were used to construct the multiple sequence alignments  
524 are listed in Supplementary Table S5.

525  
526 **Ethical Statement**

527 Bat capture and sampling were conducted with the permissions of the Wildlife and  
528 Hunting Department of the Gabonese Ministry of Water and Forestry (N°003/MEFE-PA/  
529 SG/DGEF/DCF and N°0021/MEFE-PA/SG/DGEF/DCF), and under clearance  
530 314/5327.74.1.6 from the State Office of Energy and Agriculture, the Environment and  
531 Rural Areas Schleswig-Holstein (LANU) and clearances 133/24.03.2008 and 192/  
532 26.03.2009 from the Bulgarian Ministry of Environment and Water. For the Ghanaian  
533 bats, ethics approval was obtained from the Committee for Human Research,  
534 Publications and Ethics of Komfo Anokye Teaching Hospital and School of Medical  
535 Sciences, Kwame Nkrumah University of Science and Technology, Kumasi. Research  
536 samples were exported under a state agreement between the Republic of Ghana and  
537 the Federal Republic of Germany, represented by the City of Hamburg. Additional export  
538 permission was obtained from the Veterinary Services of the Ghana Ministry of Food  
539 and Agriculture.

540  
541 **Acknowledgements**

542 This project has received funding from the European Union's Horizon 2020 research and  
543 innovation program under the Marie Skłodowska-Curie agreement No 721367 granted to  
544 J.F.D, J.M and M.V.R. EU Horizon 2020 projects EVAg (grant agreement number  
545 653316) and COMPARE (agreement number 643476) granted to C.D, and the Russian

546 Science Foundation grant 19-15-00055 to A.N.L also provided funding to the current  
547 study. H.U.E. had a personal scholarship from the BONFOR intramural program at the  
548 University of Bonn. German Federal Ministry of Education and Research (BMBF)  
549 (project code 01KIO16D), Deutsche Forschungsgemeinschaft (DFG DR 772-3/1),  
550 Deutsche Forschungsgemeinschaft within the Africa Infectious Diseases program  
551 through grants to C.D and Y.A.S (DR 772/3-1) and to S.O (KA1241/18-1) were also  
552 among the funding contributions. A personal scholarship granted to A.R from the  
553 German Academic Exchange Service (DAAD) supported field work in Costa Rica. D.J is  
554 supported by the 'Fonds Wetenschappelijk Onderzoek' (Research foundation Flanders  
555 (1S78019N). L.B was supported by the 'Fonds Wetenschappelijk Onderzoek'  
556 (1S61618N). K.C.Y was funded by the Interfaculty Council for Development Cooperation  
557 (IRO) from the KU Leuven. The computing power in this work was provided by the VSC  
558 (Flemish Supercomputer Centre), financed by the FWO and the Flemish government –  
559 department EWI.



560 **REFERENCES**

561

- 562 1. Clark A, Black R, Tate J, Roose A, Kotloff K, Lam D, Blackwelder W, Parashar U,  
563 Lanata C, Kang G, Troeger C, Platts-Mills J, Mokdad A, Sanderson C, Lamberti L,  
564 Levine M, Santosham M, Steele D. 2017. Estimating global, regional and national  
565 rotavirus deaths in children aged <5 years: Current approaches, new analyses and  
566 proposed improvements. *PLoS ONE* 12.
- 567 2. Estes MK, Kapikian AZ. 2007. Rotaviruses, p. 1917–1974. *In* Knipe, DM, Howley,  
568 PM, Griffin, DE, Lamb, RA, Martin, MA, Roizman, B, Straus, SE (eds.), *Fields*  
569 *Virology*. Kluwer Health/Lippincott, Williams and Wilkins, Philadelphia.
- 570 3. Matthijnssens J, Ciarlet M, Heiman E, Arijs I, Delbeke T, McDonald SM, Palombo  
571 EA, Iturriza-Gómara M, Maes P, Patton JT, Rahman M, Ranst MV. 2008. Full  
572 Genome-Based Classification of Rotaviruses Reveals a Common Origin between  
573 Human Wa-Like and Porcine Rotavirus Strains and Human DS-1-Like and Bovine  
574 Rotavirus Strains. *J Virol* 82:3204–3219.
- 575 4. Matthijnssens J, Ciarlet M, McDonald SM, Attoui H, Bányai K, Brister JR, Buesa J,  
576 Esona MD, Estes MK, Gentsch JR, Iturriza-Gómara M, Johne R, Kirkwood CD,  
577 Martella V, Mertens PPC, Nakagomi O, Parreño V, Rahman M, Ruggeri FM, Saif  
578 LJ, Santos N, Steyer A, Taniguchi K, Patton JT, Desselberger U, Van Ranst M.  
579 2011. Uniformity of Rotavirus Strain Nomenclature Proposed by the Rotavirus  
580 Classification Working Group (RCWG). *Arch Virol* 156:1397–1413.

- 581 5. Matthijnssens J, Ciarlet M, Rahman M, Attoui H, Bányai K, Estes MK, Gentsch JR,  
582 Iturriza-Gómara M, Kirkwood CD, Martella V, Mertens PPC, Nakagomi O, Patton  
583 JT, Ruggeri FM, Saif LJ, Santos N, Steyer A, Taniguchi K, Desselberger U, Van  
584 Ranst M. 2008. Recommendations for the classification of group a rotaviruses using  
585 all 11 genomic RNA segments. *Arch Virol*.
- 586 6. Matthijnssens J, Potgieter CA, Ciarlet M, Parreño V, Martella V, Bányai K,  
587 Garaicoechea L, Palombo EA, Novo L, Zeller M, Arista S, Gerna G, Rahman M,  
588 Ranst MV. 2009. Are Human P[14] Rotavirus Strains the Result of Interspecies  
589 Transmissions from Sheep or Other Ungulates That Belong to the Mammalian  
590 Order Artiodactyla? *J Virol* 83:2917–2929.
- 591 7. Kim H-H, Matthijnssens J, Kim H-J, Kwon H-J, Park J-G, Son K-Y, Ryu E-H, Kim D-  
592 S, Lee WS, Kang M-I, Yang D-K, Hyun B-H, Park S-I, Park S-J, Cho K-O. 2012.  
593 Full-length genomic analysis of porcine G9P[23] and G9P[7] rotavirus strains  
594 isolated from pigs with diarrhea in South Korea. *Infect Genet Evol* 12:1427–1435.
- 595 8. Matthijnssens J, Miño S, Papp H, Potgieter C, Novo L, Heylen E, Zeller M,  
596 Garaicoechea L, Badaracco A, Lengyel G, Kisfali P, Cullinane A, Collins PJ, Ciarlet  
597 M, O’Shea H, Parreño V, Bányai K, Barrandeguy M, Van Ranst M. 2012. Complete  
598 molecular genome analyses of equine rotavirus A strains from different continents  
599 reveal several novel genotypes and a largely conserved genotype constellation. *J*  
600 *Gen Virol* 93:866–875.
- 601 9. Matthijnssens J, De Grazia S, Piessens J, Heylen E, Zeller M, Giammanco GM,  
602 Bányai K, Buonavoglia C, Ciarlet M, Martella V, Van Ranst M. 2011. Multiple

- 603 reassortment and interspecies transmission events contribute to the diversity of  
604 feline, canine and feline/canine-like human group A rotavirus strains. *Infect Genet*  
605 *Evol* 11:1396–1406.
- 606 10. Schmid R, Wilson DonE, Reeder DM. 2006. *Mammal Species of the World: A*  
607 *Taxonomic and Geographic Reference*. Taxon <https://doi.org/10.2307/1223169>.
- 608 11. Badrane H, Tordo N. 2001. Host Switching in Lyssavirus History from the  
609 Chiroptera to the Carnivora Orders. *J Virol* 75:8096–8104.
- 610 12. Chua KB, Lek Koh C, Hooi PS, Wee KF, Khong JH, Chua BH, Chan YP, Lim ME,  
611 Lam SK. 2002. Isolation of Nipah virus from Malaysian Island flying-foxes. *Microbes*  
612 *Infect* 4:145–151.
- 613 13. Halpin K, Young PL, Field HE, Mackenzie JS. 2000. Isolation of Hendra virus from  
614 pteropid bats: a natural reservoir of Hendra virus. *J Gen Virol* 81:1927–1932.
- 615 14. Towner JS, Amman BR, Sealy TK, Carroll SAR, Comer JA, Kemp A, Swanepoel R,  
616 Paddock CD, Balinandi S, Khristova ML, Formenty PBH, Albarino CG, Miller DM,  
617 Reed ZD, Kayiwa JT, Mills JN, Cannon DL, Greer PW, Byaruhanga E, Farnon EC,  
618 Atimnedi P, Okware S, Katongole-Mbidde E, Downing R, Tappero JW, Zaki SR,  
619 Ksiazek TG, Nichol ST, Rollin PE. 2009. Isolation of Genetically Diverse Marburg  
620 Viruses from Egyptian Fruit Bats. *PLoS Pathog* 5.
- 621 15. Li W, Shi Z, Yu M, Ren W, Smith C, Epstein JH, Wang H, Crameri G, Hu Z, Zhang  
622 H, Zhang J, McEachern J, Field H, Daszak P, Eaton BT, Zhang S, Wang L-F. 2005.  
623 Bats are natural reservoirs of SARS-like coronaviruses. *Science* 310:676–679.

- 624 16. Wang Q, Qi J, Yuan Y, Xuan Y, Han P, Wan Y, Ji W, Li Y, Wu Y, Wang J, Iwamoto  
625 A, Woo PCY, Yuen K-Y, Yan J, Lu G, Gao GF. 2014. Bat Origins of MERS-CoV  
626 Supported by Bat Coronavirus HKU4 Usage of Human Receptor CD26. *Cell Host*  
627 *Microbe* 16:328–337.
- 628 17. Zhou P, Yang X-L, Wang X-G, Hu B, Zhang L, Zhang W, Si H-R, Zhu Y, Li B,  
629 Huang C-L, Chen H-D, Chen J, Luo Y, Guo H, Jiang R-D, Liu M-Q, Chen Y, Shen  
630 X-R, Wang X, Zheng X-S, Zhao K, Chen Q-J, Deng F, Liu L-L, Yan B, Zhan F-X,  
631 Wang Y-Y, Xiao G-F, Shi Z-L. 2020. A pneumonia outbreak associated with a new  
632 coronavirus of probable bat origin. *Nature* 579:270–273.
- 633 18. Calisher CH, Childs JE, Field HE, Holmes KV, Schountz T. 2006. Bats: Important  
634 Reservoir Hosts of Emerging Viruses. *Clin Microbiol Rev* 19:531–545.
- 635 19. Olival KJ, Hosseini PR, Zambrana-Torrel C, Ross N, Bogich TL, Daszak P. 2017.  
636 Host and viral traits predict zoonotic spillover from mammals. *Nature* 546:646–650.
- 637 20. Kim HK, Yoon S-W, Kim D-J, Koo B-S, Noh JY, Kim JH, Choi YG, Na W, Chang K-  
638 T, Song D, Jeong DG. 2016. Detection of Severe Acute Respiratory Syndrome-  
639 Like, Middle East Respiratory Syndrome-Like Bat Coronaviruses and Group H  
640 Rotavirus in Faeces of Korean Bats. *Transbound Emerg Dis* 63:365–372.
- 641 21. Yinda CK, Ghogomu SM, Conceição-Neto N, Beller L, Deboutte W, Vanhulle E,  
642 Maes P, Van Ranst M, Matthijnsens J. 2018. Cameroonian fruit bats harbor  
643 divergent viruses, including rotavirus H, bastroviruses, and picobirnaviruses using  
644 an alternative genetic code. *Virus Evol* 4.

- 645 22. Bányai K, Kemenesi G, Budinski I, Földes F, Zana B, Marton S, Varga-Kugler R,  
646 Oldal M, Kurucz K, Jakab F. 2017. Candidate new rotavirus species in Schreiber's  
647 bats, Serbia. *Infect Genet Evol* 48:19–26.
- 648 23. Esona MD, Mijatovic-Rustempasic S, Conrardy C, Tong S, Kuzmin IV, Agwanda B,  
649 Breiman RF, Banyai K, Niezgoda M, Rupprecht CE, Gentsch JR, Bowen MD. 2010.  
650 Reassortant Group A Rotavirus from Straw-colored Fruit Bat (*Eidolon helvum*).  
651 *Emerg Infect Dis* 16:1844–1852.
- 652 24. He B, Yang F, Yang W, Zhang Y, Feng Y, Zhou J, Xie J, Feng Y, Bao X, Guo H, Li  
653 Y, Xia L, Li N, Matthijnssens J, Zhang H, Tu C. 2013. Characterization of a Novel  
654 G3P[3] Rotavirus Isolated from a Lesser Horseshoe Bat: a Distant Relative of  
655 Feline/Canine Rotaviruses. *J Virol* 87:12357–12366.
- 656 25. Xia L, Fan Q, He B, Xu L, Zhang F, Hu T, Wang Y, Li N, Qiu W, Zheng Y,  
657 Matthijnssens J, Tu C. 2014. The complete genome sequence of a G3P[10]  
658 Chinese bat rotavirus suggests multiple bat rotavirus inter-host species  
659 transmission events. *Infect Genet Evol* 28:1–4.
- 660 26. He B, Huang X, Zhang F, Tan W, Matthijnssens J, Qin S, Xu L, Zhao Z, Yang L,  
661 Wang Q, Hu T, Bao X, Wu J, Tu C. 2017. Group A Rotaviruses in Chinese Bats:  
662 Genetic Composition, Serology, and Evidence for Bat-to-Human Transmission and  
663 Reassortment. *J Virol* 91.

- 664 27. Zheng X, Qiu M, Guan W, Li J, Chen S, Cheng M, Huo S, Chen Z, Wu Y, Jiang L,  
665 Chen Q. 2018. Viral metagenomics of six bat species in close contact with humans  
666 in southern China. *Arch Virol* 163:73–88.
- 667 28. Dacheux L, Cervantes-Gonzalez M, Guigon G, Thiberge J-M, Vandebogaert M,  
668 Maufrais C, Caro V, Bourhy H. 2014. A Preliminary Study of Viral Metagenomics of  
669 French Bat Species in Contact with Humans: Identification of New Mammalian  
670 Viruses. *PLoS ONE* 9:e87194.
- 671 29. Asano KM, Gregori F, Hora AS, Scheffer KC, Fahl WO, Iamamoto K, Mori E, Silva  
672 FDF, Taniwaki SA, Brandão PE. 2016. Group A rotavirus in Brazilian bats:  
673 description of novel T15 and H15 genotypes. *Arch Virol* 161:3225–3230.
- 674 30. Sasaki M, Orba Y, Sasaki S, Gonzalez G, Ishii A, Hang'ombe BM, Mweene AS, Ito  
675 K, Sawa H. 2016. Multi-reassortant G3P[3] group A rotavirus in a horseshoe bat in  
676 Zambia. *J Gen Virol* 97:2488–2493.
- 677 31. Sasaki M, Kajihara M, Changula K, Mori-Kajihara A, Ogawa H, Hang'ombe BM,  
678 Mweene AS, Simuunza M, Yoshida R, Carr M, Orba Y, Takada A, Sawa H. 2018.  
679 Identification of group A rotaviruses from Zambian fruit bats provides evidence for  
680 long-distance dispersal events in Africa. *Infect Genet Evol* 63:104–109.
- 681 32. Yinda CK, Zeller M, Conceição-Neto N, Maes P, Deboutte W, Beller L, Heylen E,  
682 Ghogomu SM, Van Ranst M, Matthijnsens J. 2016. Novel highly divergent  
683 reassortant bat rotaviruses in Cameroon, without evidence of zoonosis. *Sci Rep*  
684 6:34209.

- 685 33. Waruhiu C, Ommeh S, Obanda V, Agwanda B, Gakuya F, Ge X-Y, Yang X-L, Wu  
686 L-J, Zohaib A, Hu B, Shi Z-L. 2017. Molecular detection of viruses in Kenyan bats  
687 and discovery of novel astroviruses, caliciviruses and rotaviruses. *Virology* 32:101–  
688 114.
- 689 34. Mishra N, Fagbo SF, Alagaili AN, Nitido A, Williams SH, Ng J, Lee B, Durosinlorun  
690 A, Garcia JA, Jain K, Kapoor V, Epstein JH, Briese T, Memish ZA, Olival KJ, Lipkin  
691 WI. 2019. A viral metagenomic survey identifies known and novel mammalian  
692 viruses in bats from Saudi Arabia. *PLoS ONE* 14.
- 693 35. Miño S, Matthijnssens J, Badaracco A, Garaicoechea L, Zeller M, Heylen E, Van  
694 Ranst M, Barrandeguy M, Parreño V. 2013. Equine G3P[3] rotavirus strain E3198  
695 related to simian RRV and feline/canine-like rotaviruses based on complete  
696 genome analyses. *Vet Microbiol* 161:239–246.
- 697 36. Okitsu S, Hikita T, Thongprachum A, Khamrin P, Takanashi S, Hayakawa S,  
698 Maneekarn N, Ushijima H. 2018. Detection and molecular characterization of two  
699 rare G8P[14] and G3P[3] rotavirus strains collected from children with acute  
700 gastroenteritis in Japan. *Infect Genet Evol* 62:95–108.
- 701 37. Solberg OD, Hasing ME, Trueba G, Eisenberg JNS. 2009. Characterization of novel  
702 VP7, VP4, and VP6 genotypes of a previously untypeable group A rotavirus.  
703 *Virology* 385:58–67.
- 704 38. Esona MD, Roy S, Rungsririyachai K, Gautam R, Hermelijn S, Rey-Benito G,  
705 Bowen MD. 2018. Molecular characterization of a human G20P[28] rotavirus a

- 706 strain with multiple genes related to bat rotaviruses. *Infect Genet Evol J Mol*  
707 *Epidemiol Evol Genet Infect Dis* 57:166–170.
- 708 39. Drexler JF, Corman VM, Müller MA, Maganga GD, Vallo P, Binger T, Gloza-Rausch  
709 F, Cottontail VM, Rasche A, Yordanov S, Seebens A, Knörnschild M, Oppong S,  
710 Sarkodie YA, Pongombo C, Lukashev AN, Schmidt-Chanasit J, Stöcker A, Carneiro  
711 AJB, Erbar S, Maisner A, Fronhoffs F, Buettner R, Kalko EKV, Kruppa T, Franke  
712 CR, Kallies R, Yandoko ERN, Herrler G, Reusken C, Hassanin A, Krüger DH,  
713 Matthee S, Ulrich RG, Leroy EM, Drosten C. 2012. Bats host major mammalian  
714 paramyxoviruses. *Nat Commun* 3:796.
- 715 40. Lau SKP, Woo PCY, Lai KKY, Huang Y, Yip CCY, Shek C-T, Lee P, Lam CSF,  
716 Chan K-H, Yuen K-Y. 2011. Complete Genome Analysis of Three Novel  
717 Picornaviruses from Diverse Bat Species. *J Virol* 85:8819–8828.
- 718 41. Pritchard LI, Chua KB, Cummins D, Hyatt A, Crameri G, Eaton BT, Wang L-F.  
719 2006. Pulau virus; a new member of the Nelson Bay orthoreovirus species isolated  
720 from fruit bats in Malaysia. *Arch Virol* 151:229–239.
- 721 42. Chu DKW, Poon LLM, Guan Y, Peiris JSM. 2008. Novel Astroviruses in  
722 Insectivorous Bats. *J Virol* 82:9107–9114.
- 723 43. Holland RE. 1990. Some infectious causes of diarrhea in young farm animals. *Clin*  
724 *Microbiol Rev* 3:345–375.
- 725 44. Guy JS. 1998. Virus infections of the gastrointestinal tract of poultry. *Poult Sci*  
726 77:1166–1175.



- 727 45. Dhama K, Chauhan RS, Mahendran M, Malik SVS. 2009. Rotavirus diarrhea in  
728 bovine and other domestic animals. *Vet Res Commun* 33:1–23.
- 729 46. Cook N, Bridger J, Kendall K, Gomara MI, El-Attar L, Gray J. 2004. The zoonotic  
730 potential of rotavirus. *J Infect* 48:289–302.
- 731 47. Rahman M, Matthijnssens J, Goegebuer T, De Leener K, Vanderwegen L, van der  
732 Donck I, Van Hoovels L, De Vos S, Azim T, Van Ranst M. 2005. Predominance of  
733 rotavirus G9 genotype in children hospitalized for rotavirus gastroenteritis in  
734 Belgium during 1999–2003. *J Clin Virol* 33:1–6.
- 735 48. Rahman M, Matthijnssens J, Yang X, Delbeke T, Arijs I, Taniguchi K, Iturriza-  
736 Gómara M, Iftekharruddin N, Azim T, Van Ranst M. 2007. Evolutionary History and  
737 Global Spread of the Emerging G12 Human Rotaviruses. *J Virol* 81:2382–2390.
- 738 49. Matthijnssens J, Ciarlet M, McDonald SM, Attoui H, Bányai K, Brister JR, Buesa J,  
739 Esona MD, Estes MK, Gentsch JR, Iturriza-Gómara M, Johne R, Kirkwood CD,  
740 Martella V, Mertens PPC, Nakagomi O, Parreño V, Rahman M, Ruggeri FM, Saif  
741 LJ, Santos N, Steyer A, Taniguchi K, Patton JT, Desselberger U, van Ranst M.  
742 2011. Uniformity of rotavirus strain nomenclature proposed by the Rotavirus  
743 Classification Working Group (RCWG). *Arch Virol* [https://doi.org/10.1007/s00705-](https://doi.org/10.1007/s00705-011-1006-z)  
744 [011-1006-z](https://doi.org/10.1007/s00705-011-1006-z).
- 745 50. Matthijnssens J, Ciarlet M, Rahman M, Attoui H, Bányai K, Estes MK, Gentsch JR,  
746 Iturriza-Gómara M, Kirkwood CD, Martella V, Mertens PPC, Nakagomi O, Patton  
747 JT, Ruggeri FM, Saif LJ, Santos N, Steyer A, Taniguchi K, Desselberger U, Van

- 748 Ranst M. 2008. Recommendations for the classification of group A rotaviruses  
749 using all 11 genomic RNA segments. *Arch Virol* 153:1621–1629.
- 750 51. Sasaki M, Kajihara M, Changula K, Mori-Kajihara A, Ogawa H, Hang'ombe BM,  
751 Mweene AS, Simuunza M, Yoshida R, Carr M, Orba Y, Takada A, Sawa H. 2018.  
752 Identification of group A rotaviruses from Zambian fruit bats provides evidence for  
753 long-distance dispersal events in Africa. *Infect Genet Evol*  
754 <https://doi.org/10.1016/j.meegid.2018.05.016>.
- 755 52. Voigt CC, Frick WF, Holderied MW, Holland R, Kerth G, Mello MAR, Plowright RK,  
756 Swartz S, Yovel Y. 2017. Principles and Patterns of Bat Movements: From  
757 Aerodynamics to Ecology. *Q Rev Biol* 92:267–287.
- 758 53. Richter HV, Cumming GS. 2008. First application of satellite telemetry to track  
759 African straw-coloured fruit bat migration. *J Zool* 275:172–176.
- 760 54. Cryan PM, Stricker CA, Wunder MB. 2014. Continental-scale, seasonal movements  
761 of a heterothermic migratory tree bat. *Ecol Appl* 24:602–616.
- 762 55. Fleming TH, Eby P. 2005. Ecology of bat migration, p. 159–166. *In* Kunz, TH,  
763 Fenton, B (eds.), *Bat ecology*. University of Chicago Press, Chicago, IL.
- 764 56. Lukashev AN, Corman VM, Schacht D, Gloza-Rausch F, Seebens-Hoyer A, Gmyl  
765 AP, Drosten C, Drexler JF. 2017. Close genetic relatedness of picornaviruses from  
766 European and Asian bats. *J Gen Virol* 98:955–961.
- 767 57. Malherbe H, Harwin R. 1963. The cytopathic effects of vervet monkey viruses.  
768 *South Afr Med J Suid-Afr Tydskr Vir Geneesk* 37:407–411.

- 769 58. Small C, Barro M, Brown TL, Patton JT. 2007. Genome Heterogeneity of SA11  
770 Rotavirus Due to Reassortment with “O” Agent. *Virology* 359:415.
- 771 59. Komoto S, Sasaki J, Taniguchi K. 2006. Reverse genetics system for introduction of  
772 site-specific mutations into the double-stranded RNA genome of infectious  
773 rotavirus. *Proc Natl Acad Sci* 103:4646–4651.
- 774 60. Ghosh S, Gatheru Z, Nyangao J, Adachi N, Urushibara N, Kobayashi N. 2011. Full  
775 genomic analysis of a simian SA11-like G3P[2] rotavirus strain isolated from an  
776 asymptomatic infant: Identification of novel VP1, VP6 and NSP4 genotypes. *Infect*  
777 *Genet Evol* 11:57–63.
- 778 61. Dóro R, László B, Martella V, Leshem E, Gentsch J, Parashar U, Bányai K. 2014.  
779 Review of global rotavirus strain prevalence data from six years post vaccine  
780 licensure surveillance: Is there evidence of strain selection from vaccine pressure?  
781 *Infect Genet Evol* 28:446–461.
- 782 62. Wang Y-H, Pang B-B, Zhou X, Ghosh S, Tang W-F, Peng J-S, Hu Q, Zhou D-J,  
783 Kobayashi N. 2013. Complex evolutionary patterns of two rare human G3P[9]  
784 rotavirus strains possessing a feline/canine-like H6 genotype on an AU-1-like  
785 genotype constellation. *Infect Genet Evol* 16:103–112.
- 786 63. Corman VM, Rasche A, Diallo TD, Cottontail VM, Stöcker A, Souza BF de CD,  
787 Corrêa JI, Carneiro AJB, Franke CR, Nagy M, Metz M, Knörnschild M, Kalko EKV,  
788 Ghanem SJ, Morales KDS, Salsamendi E, Spínola M, Herrler G, Voigt CC,

- 789 Tschapka M, Drosten C, Drexler JF. 2013. Highly diversified coronaviruses in  
790 neotropical bats. *J Gen Virol* 94:1984–1994.
- 791 64. Pfefferle S, Oppong S, Drexler JF, Gloza-Rausch F, Ipsen A, Seebens A, Müller  
792 MA, Annan A, Vallo P, Adu-Sarkodie Y, Kruppa TF, Drosten C. 2009. Distant  
793 Relatives of Severe Acute Respiratory Syndrome Coronavirus and Close Relatives  
794 of Human Coronavirus 229E in Bats, Ghana. *Emerg Infect Dis* 15:1377–1384.
- 795 65. Drexler JF, Gloza-Rausch F, Glende J, Corman VM, Muth D, Goettsche M,  
796 Seebens A, Niedrig M, Pfefferle S, Yordanov S, Zhelyazkov L, Hermanns U, Vallo  
797 P, Lukashev A, Müller MA, Deng H, Herrler G, Drosten C. 2010. Genomic  
798 Characterization of Severe Acute Respiratory Syndrome-Related Coronavirus in  
799 European Bats and Classification of Coronaviruses Based on Partial RNA-  
800 Dependent RNA Polymerase Gene Sequences. *J Virol* 84:11336–11349.
- 801 66. Rougeron V, Suquet E, Maganga GD, Jiolle D, Mombo IM, Bourgarel M, Motsch P,  
802 Arnathau C, Durand P, Drexler F, Drosten C, Renaud F, Prugnotte F, Leroy EM.  
803 2016. Characterization and phylogenetic analysis of new bat astroviruses detected  
804 in Gabon, Central Africa. *Acta Virol* 60:386–392.
- 805 67. Conceição-Neto N, Zeller M, Lefrère H, De Bruyn P, Beller L, Deboutte W, Yinda  
806 CK, Lavigne R, Maes P, Ranst M Van, Heylen E, Matthijnssens J. 2015. Modular  
807 approach to customise sample preparation procedures for viral metagenomics: A  
808 reproducible protocol for virome analysis. *Sci Rep* 5.

- 809 68. Yinda CK, Zeller M, Conceicaõ-Neto N, Maes P, Deboutte W, Beller L, Heylen E,  
810 Ghogomu SM, Van Ranst M, Jelle A. 2016. Novel highly divergent reassortant bat  
811 rotaviruses in Cameroon, without evidence of zoonosis. *Sci Rep*  
812 <https://doi.org/10.1038/srep34209>.
- 813 69. Bolger AM, Lohse M, Usadel B. 2014. Trimmomatic: A flexible trimmer for Illumina  
814 sequence data. *Bioinformatics* <https://doi.org/10.1093/bioinformatics/btu170>.
- 815 70. Nurk S, Meleshko D, Korobeynikov A, Pevzner PA. 2017. MetaSPAdes: A new  
816 versatile metagenomic assembler. *Genome Res*  
817 <https://doi.org/10.1101/gr.213959.116>.
- 818 71. Buchfink B, Xie C, Huson DH. 2014. Fast and sensitive protein alignment using  
819 DIAMOND. *Nat Methods*.
- 820 72. Altschul SF, Gish W, Miller W, Myers EW, Lipman DJ. 1990. Basic local alignment  
821 search tool. *J Mol Biol* [https://doi.org/10.1016/S0022-2836\(05\)80360-2](https://doi.org/10.1016/S0022-2836(05)80360-2).
- 822 73. Li H, Durbin R. 2010. Fast and accurate long-read alignment with Burrows-Wheeler  
823 transform. *Bioinformatics* <https://doi.org/10.1093/bioinformatics/btp698>.
- 824 74. Li H, Handsaker B, Wysoker A, Fennell T, Ruan J, Homer N, Marth G, Abecasis G,  
825 Durbin R, 1000 Genome Project Data Processing Subgroup. 2009. The Sequence  
826 Alignment/Map format and SAMtools. *Bioinforma Oxf Engl* 25:2078–2079.
- 827 75. Wheeler DL, Church DM, Federhen S, Lash AE, Madden TL, Pontius JU, Schuler  
828 GD, Schriml LM, Sequeira E, Tatusova TA, Wagner L. 2003. Database resources of

- 829 the National Center for Biotechnology. *Nucleic Acids Res*  
830 <https://doi.org/10.1093/nar/gkg033>.
- 831 76. Edgar RC. 2004. MUSCLE: Multiple sequence alignment with high accuracy and  
832 high throughput. *Nucleic Acids Res* <https://doi.org/10.1093/nar/gkh340>.
- 833 77. Kumar S, Stecher G, Tamura K. 2016. MEGA7: Molecular Evolutionary Genetics  
834 Analysis Version 7.0 for Bigger Datasets. *Mol Biol Evol*  
835 <https://doi.org/10.1093/molbev/msw054>.
- 836 78. Grant BJ, Rodrigues APC, ElSawy KM, McCammon JA, Caves LSD. 2006. Bio3d:  
837 an R package for the comparative analysis of protein structures. *Bioinforma Oxf*  
838 *Engl* 22:2695–2696.
- 839 79. Capella-Gutierrez S, Silla-Martinez JM, Gabaldon T. 2009. trimAl: a tool for  
840 automated alignment trimming in large-scale phylogenetic analyses. *Bioinformatics*  
841 25:1972–1973.
- 842 80. Kozlov AM, Darriba D, Flouri T, Morel B, Stamatakis A. 2019. RAxML-NG: a fast,  
843 scalable and user-friendly tool for maximum likelihood phylogenetic inference.  
844 *Bioinformatics* 35:4453–4455.
- 845 81. Hancock JM, Zvelebil MJ, Cummings MP. 2014. FigTreeDictionary of  
846 *Bioinformatics and Computational Biology*.
- 847 82. Becker RA, Allan R. Wilks, Deckmyn A, Ray Brownrigg, Thomas P. Minka. 2018.  
848 *maps: Draw Geographical Maps*.

849 **Figure Legends and Tables**

850 **Figure 1.** Geographic distribution of the currently known bat RVA GCs. The colored dots  
851 on the map represent the circulating genotypes at the specified locations according to  
852 the GCs shown in Table 3.

853 **Figure 2.** Maximum likelihood trees of the VP1, VP2, VP3 and NSP1 genes of the  
854 identified bat RVA strains with known human, bat and other mammal RVAs. Only  
855 bootstrap values above 70 are shown. The genotypes are listed on the right side of the  
856 trees. The bat RVA strains identified in this study are shown in bold and colored to their  
857 GC, previously reported bat RVA strains are shown in bold in black, and non-bat RVA  
858 strains related to a bat RVA strain are marked with filled stars.

859 **Figure 3.** Maximum likelihood trees of the VP4, VP6 and VP7 genes of the identified bat  
860 RVA strains with known human, bat and other mammal RVAs. Only bootstrap  
861 values above 70 are shown. The genotypes are listed on the right side of the trees. The  
862 bat RVA strains identified in this study are shown in bold and colored to their GC,  
863 previously reported bat RVA strains are shown in bold in black, and non-bat RVA strains  
864 related to a bat RVA strain are marked with filled stars.

865 **Figure 4.** Maximum likelihood trees of the NSP2, NSP3, NSP4 and NSP5 genes of the  
866 identified bat RVA strains with known human, bat and other mammal RVAs. Only  
867 bootstrap values above 70 are shown. The genotypes are listed on the right side of the  
868 trees. The bat RVA strains identified in this study are shown in bold and colored to their  
869 GC, previously reported bat RVA strains are shown in bold in black, and non-bat RVA  
870 strains related to a bat RVA strain are marked with filled stars.

871 **Table 1.** Meta-data and NGS summary of the sequenced RVA-positive samples

| Sample ID       | Location         | Country    | Year | Bat species                   | Bat Diet | Raw Reads   | Trimmed Reads | N° of RVA reads <sup>a</sup> | RVA read percentage <sup>b</sup> |
|-----------------|------------------|------------|------|-------------------------------|----------|-------------|---------------|------------------------------|----------------------------------|
| <b>BB89-15</b>  | Elenas Cave      | Bulgaria   | 2008 | <i>Rhinolophus blasii</i>     | Insect   | 13,508,743  | 3,850,458     | 56,536                       | 1.5%                             |
| <b>BR89-60</b>  | Roman Horse Cave | Bulgaria   | 2008 | <i>Rhinolophus euryale</i>    | Insect   | 11,812,353  | 3,224,700     | 2,278                        | 0.1%                             |
| <b>SW78-39</b>  | Wahlstorf, SH    | Germany    | 2008 | <i>Myotis daubentonii</i>     | Insect   | 5,720,709   | 5,411,241     | 0                            | 0.0%                             |
| <b>GKS-660</b>  | Zadie            | Gabon      | 2009 | <i>Hipposideros caffer</i>    | Insect   | 7,356,697   | 5,404,115     | 4                            | 0.0%                             |
| <b>GKS-897</b>  | Faucon           | Gabon      | 2009 | <i>Hipposideros gigas</i>     | Insect   | 6,994,665   | 3,938,299     | 30,929                       | 0.8%                             |
| <b>GKS-912</b>  | Faucon           | Gabon      | 2009 | <i>Hipposideros gigas</i>     | Insect   | 4,018,151   | 2,968,694     | 1,236,102                    | 41.6%                            |
| <b>GKS-926</b>  | Faucon           | Gabon      | 2009 | <i>Hipposideros gigas</i>     | Insect   | 6,346,691   | 4,955,591     | 4,479,073                    | 90.4%                            |
| <b>GKS-929</b>  | Faucon           | Gabon      | 2009 | <i>Hipposideros gigas</i>     | Insect   | 993,739     | 718,192       | 315,056                      | 43.9%                            |
| <b>GKS-934</b>  | Faucon           | Gabon      | 2009 | <i>Hipposideros gigas</i>     | Insect   | 7,341,726   | 5,454,901     | 35,259                       | 0.7%                             |
| <b>GKS-941</b>  | Faucon           | Gabon      | 2009 | <i>Hipposideros gigas</i>     | Insect   | 5,923,863   | 3,741,568     | 442,380                      | 11.8%                            |
| <b>GKS-942</b>  | Faucon           | Gabon      | 2009 | <i>Hipposideros gigas</i>     | Insect   | 8,363,558   | 6,453,805     | 0                            | 0.0%                             |
| <b>GKS-953</b>  | Faucon           | Gabon      | 2009 | <i>Hipposideros gigas</i>     | Insect   | 4,361,523   | 3,358,374     | 22                           | 0.0%                             |
| <b>GKS-954</b>  | Faucon           | Gabon      | 2009 | <i>Hipposideros gigas</i>     | Insect   | 7,358,552   | 5,683,659     | 201,335                      | 3.5%                             |
| <b>GKS-955</b>  | Faucon           | Gabon      | 2009 | <i>Hipposideros gigas</i>     | Insect   | 5,704,559   | 3,820,529     | 23                           | 0.0%                             |
| <b>K212</b>     | Kumasi           | Ghana      | 2009 | <i>Eidolon helvum</i>         | Fruit    | 8,367,278   | 5,189,608     | 17,206                       | 0.3%                             |
| <b>KCR10-93</b> | Orosi            | Costa Rica | 2010 | <i>Carollia perspicillata</i> | Insect   | 7,731,234   | 2,235,422     | 12,179                       | 0.5%                             |
| <b>Average</b>  |                  |            |      |                               |          | 6,994,003   | 4,150,572     | 426,774                      | 12.2%                            |
| <b>Total</b>    |                  |            |      |                               |          | 118,929,778 | 67,370,384    | 6,828,382                    |                                  |

<sup>a</sup> Number of unique trimmed reads mapping to RVA genomic segments in the corresponding sample

<sup>b</sup> Proportion of RVA reads to all the reads in the corresponding sample



872 **Table 2.** Color-coded GCs of the bat RVA strains identified in this study. In some  
 873 samples, 2 different variants of the same gene segments were identified, suggesting co-  
 874 infections. K212 possessed 2 distinct VP3 gene segments belonging to the same M14  
 875 genotype (indicated with an asterisk). NSP5 gene of KCR10-93 could not be assigned to  
 876 any of the established genotypes; neither assigned to a novel genotype as the complete  
 877 ORF could not be determined. Therefore, this genotype is indicated as “H?”.

| Strains                               | VP7 | VP4   | VP6 | VP1 | VP2 | VP3  | NSP1 | NSP2 | NSP3 | NSP4 | NSP5 |
|---------------------------------------|-----|-------|-----|-----|-----|------|------|------|------|------|------|
| RVA/Bat-wt/BGR/BB89-15/2008/G3P[3]    | G3  | P[3]  | I3  | R3  | C3  | M3   | A9   | N3   | T3   | E3   | H6   |
| RVA/Bat-wt/BGR/BB89-60/2008/G3P[3]    | G3  | P[3]  | I3  | R3  | C3  | M3   | A9   | N3   | T3   | E3   | H6   |
| RVA/Bat-wt/GAB/GKS-897/2009/G3P[3]    | G3  | P[3]  | I8  | R8  | C5  | M5   | A36  | N3   | T5   | E3   | H5   |
| RVA/Bat-wt/GAB/GKS-954/2009/G3P[3]    | G3  | P[3]  | I30 | R8  | C5  | M5   | A36  | N3   | T3   | E3   | H5   |
| RVA/Bat-wt/GAB/GKS-941/2009/G3P[3]    | G3  | P[3]  | I30 | R8  | C5  | M5   | A36  | N3   | T3   | E3   | H5   |
| RVA/Bat-wt/GAB/GKS-929/2009/G3P[2]    | G3  | P[2]  | I30 | R8  | C5  | M5   | A36  | N23  | T5   | E28  | H5   |
| RVA/Bat-wt/GAB/GKS-912/2009/G3P[3-2]  | G3  | P[3]  | I30 | R8  | C5  | M5   | A36  | N3   | T3   | E3   | H5   |
| RVA/Bat-wt/GAB/GKS-926/2009/G3P[3-2]  | G3  | P[3]  | I30 | R8  | C5  | M5   | A36  | N3   | T3   | E3   | H5   |
| RVA/Bat-wt/GAB/GKS-934/2009/G3P[3-2]  | G3  | P[2]  | I30 | R8  | C3  | M3   | A36  | N3   | T5   | E3   | H5   |
| RVA/Bat-wt/GAB/GKS-934/2009/G3P[3-2]  | G3  | P[3]  | I30 | R8  | C5  | M5   | A36  | N3   | T3   | E3   | H5   |
| RVA/Bat-wt/GHA/K212/2009/G30P[47]     | G30 | P[47] | I22 | R15 | C15 | M14* | A25  | N15  | T17  | E22  | H17  |
| RVA/Bat-wt/CRC/KCR10-93/2010/G20P[47] | G20 | P[47] | I13 | R13 | C13 | M12  | A32  | N13  | T23  | E20  | H?   |

878 **Table 3.** Color-coded GCs for the bat RVA strains identified in this study, previously  
 879 published bat RVA strains, as well as a selection of RVA strains from other host species  
 880 potentially related to bats. The non-sequenced segments or unassigned genotypes are  
 881 denoted with '[letter code]?'. The genotypes colored in light grey are less relevant due to  
 882 a lack of (in)direct genomic relationship with bat RVAs identified in the current study.  
 883 The strain names are color-matched with the corresponding GCs (orange, purple, blue,

| Strains                                      | VP7 | VP4   | VP6 | VP1 | VP2 | VP3 | NSP1 | NSP2 | NSP3 | NSP4 | NSP5 |
|----------------------------------------------|-----|-------|-----|-----|-----|-----|------|------|------|------|------|
| RVA/Human-tc/JPN/AU-1/1982/G3P[9]            | G3  | P[9]  | I3  | R3  | C3  | M3  | A3   | N3   | T3   | E3   | H3   |
| RVA/Human-wt/CHN/E2451/2011/G3P[9]           | G3  | P[9]  | I3  | R3  | C3  | M3  | A3   | N3   | T3   | E3   | H6   |
| RVA/Human-tc/CHN/L621/2006/G3P[9]            | G3  | P[9]  | I3  | R3  | C3  | M3  | A3   | N3   | T3   | E3   | H6   |
| RVA/Horse-wt/ARG/E3198/2008/G3P[3]           | G3  | P[3]  | I3  | R3  | C3  | M3  | A9   | N3   | T3   | E3   | H6   |
| <b>RVA/Bat-wt/BGR/BB89-15/2008/G3P[3]</b>    | G3  | P[3]  | I3  | R3  | C3  | M3  | A9   | N3   | T3   | E3   | H6   |
| <b>RVA/Bat-wt/BGR/BB89-60/2008/G3P[3]</b>    | G3  | P[3]  | I3  | R3  | C3  | M3  | A9   | N3   | T3   | E3   | H6   |
| RVA/Bat-wt/CHN/LZHP2/2015/G3P[3]             | G3  | P[3]  | I3  | R3  | C3  | M3  | A9   | N3   | T3   | E3   | H6   |
| RVA/Bat-wt/BRA/4754/2013/G3P[3]              | G3  | P[3]  | I?  | R?  | C?  | M?  | A?   | N?   | T3   | E3   | H6   |
| RVA/Bat-tc/CHN/MSLH14/2012/G3P[3]            | G3  | P[3]  | I8  | R3  | C3  | M3  | A9   | N3   | T3   | E3   | H6   |
| RVA/Bat-wt/CHN/BSTM70/2015/G3P[3]            | G3  | P[3]  | I8  | R3  | C3  | M3  | A29  | N3   | T3   | E3   | H6   |
| RVA/Bat-tc/CHN/MYAS33/2013/G3P[10]           | G3  | P[10] | I8  | R3  | C3  | M3  | A9   | N3   | T3   | E3   | H6   |
| RVA/Human-wt/US/09US7118/2009/G3P[24]        | G3  | P[24] | I2  | R2  | C3  | M3  | A9   | N3   | T3   | E3   | H6   |
| RVA/Rhesus-tc/USA/TUCH/2002/G3P[24]          | G3  | P[24] | I9  | R3  | C3  | M3  | A9   | N1   | T3   | E3   | H6   |
| RVA/Simian-tc/USA/RRV/1975/G3P[3]            | G3  | P[3]  | I9  | R2  | C3  | M3  | A9   | N2   | T3   | E3   | H6   |
| RVA/Bat-wt/ZMB/LUS12-14/2012/G3P[3]          | G3  | P[3]  | I3  | R2  | C2  | M3  | A9   | N2   | T3   | E2   | H3   |
| RVA/Dog-tc/ITA/RV198-95/1995/G3P[3]          | G3  | P[3]  | I3  | R3  | C2  | M3  | A9   | N2   | T3   | E3   | H6   |
| RVA/Dog-wt/HUN/135/2012/G3P[3]               | G3  | P[3]  | I3  | R3  | C3  | M3  | A15  | N2   | T3   | E3   | H6   |
| RVA/Bat-wt/CHN/YSSK5/2015/G3P[3]             | G3  | P[3]  | I8  | R20 | C2  | M1  | A9   | N3   | T3   | E3   | H6   |
| RVA/Bat-wt/KEN/322/Kwale/2015/G3P[10]        | G3  | P[10] | I2  | R8  | C3  | M5  | A5   | N3   | T6   | E3   | H6   |
| <b>RVA/Bat-wt/GAB/GKS-897/2009/G3P[3]</b>    | G3  | P[3]  | I8  | R8  | C5  | M5  | A36  | N3   | T5   | E3   | H5   |
| <b>RVA/Bat-wt/GAB/GKS-954/2009/G3P[3]</b>    | G3  | P[3]  | I30 | R8  | C5  | M5  | A36  | N3   | T3   | E3   | H5   |
| <b>RVA/Bat-wt/GAB/GKS-941/2009/G3P[3]</b>    | G3  | P[3]  | I30 | R8  | C5  | M5  | A36  | N3   | T3   | E3   | H5   |
| <b>RVA/Bat-wt/GAB/GKS-929/2009/G3P[2]</b>    | G3  | P[2]  | I30 | R8  | C5  | M5  | A36  | N23  | T5   | E28  | H5   |
| <b>RVA/Bat-wt/GAB/GKS-912/2009/G3P[3-2]</b>  | G3  | P[3]  | I30 | R8  | C5  | M5  | A36  | N3   | T3   | E3   | H5   |
| <b>RVA/Bat-wt/GAB/GKS-926/2009/G3P[3-2]</b>  | G3  | P[2]  | I30 | R8  | C5  | M5  | A36  | N3   | T3   | E3   | H5   |
| <b>RVA/Bat-wt/GAB/GKS-934/2009/G3P[3-2]</b>  | G3  | P[3]  | I30 | R8  | C3  | M3  | A36  | N3   | T3   | E3   | H5   |
| RVA/Human-tc/KEN/B10/1987/G3P[2]             | G3  | P[2]  | I16 | R8  | C5  | M5  | A5   | N5   | T5   | E13  | H5   |
| RVA/Simian-tc/ZAF/SA11-H96/1958/G3P[2]       | G3  | P[2]  | I2  | R2  | C5  | M5  | A5   | N5   | T5   | E2   | H5   |
| RVA/Human/CHN/ZTR-5/XXXX/G3P[2]              | G3  | P[2]  | I2  | R2  | C5  | M5  | A5   | N2   | T5   | E2   | H5   |
| <b>RVA/Bat-wt/KEN/BATp39/2015/G36P[51]</b>   | G36 | P[51] | I16 | R22 | C20 | M20 | A31  | N22  | T22  | E27  | H22  |
| <b>RVA/Bat-wt/CMR/BatLy17/2014/G30P[47]</b>  | G30 | P[47] | I22 | R15 | C15 | M14 | A25  | N15  | T17  | E22  | H17  |
| <b>RVA/Bat-wt/GHA/K212/2009/G30P[47]</b>     | G30 | P[47] | I22 | R15 | C15 | M14 | A25  | N15  | T17  | E22  | H17  |
| RVA/Bat-wt/CMR/BatLi10/2014/G30P[42]         | G30 | P[42] | I22 | R15 | C15 | M14 | A25  | N15  | T17  | E22  | H17  |
| RVA/Bat-wt/CMR/BatLi09/2014/G30P[42]         | G30 | P[42] | I22 | R15 | C15 | M14 | A25  | N15  | T17  | E22  | H17  |
| RVA/Bat-wt/CMR/BatLi08/2014/G31P[42]         | G31 | P[42] | I22 | R15 | C15 | M14 | A25  | N15  | T17  | E22  | H17  |
| RVA/Bat-wt/ZMB/ZFB14-52/2014/G31P[x]         | G31 | P?    | I22 | R?  | C?  | M?  | A?   | N?   | T17  | E?   | H?   |
| RVA/Bat-wt/ZMB/ZFB14-135/2014/G31P[x]        | G31 | P?    | I22 | R15 | C?  | M?  | A?   | N?   | T17  | E?   | H?   |
| RVA/Bat-wt/ZMB/ZFB14-126/2014/GxP[x]         | G?  | P?    | I22 | R?  | C?  | M?  | A?   | N21  | T17  | E27  | H?   |
| <b>RVA/Bat-wt/CRC/KCR10-93/2010/G20P[47]</b> | G20 | P[47] | I13 | R13 | C13 | M12 | A32  | N13  | T23  | E20  | H?   |
| RVA/Bat-wt/3081/BRA/2013/G20P[x]             | G20 | P?    | I?  | R?  | C?  | M?  | A?   | N?   | T15  | E?   | H15  |
| RVA/Human-wt/SUR/2014735512/2013/G20P[28]    | G20 | P[28] | I13 | R13 | C13 | M12 | A23  | N13  | T15  | E20  | H15  |
| RVA/Human-wt/ECU/Ecu534/2006/G20P[28]        | G20 | P[28] | I13 | R?  | C?  | M?  | A?   | N?   | T?   | E?   | H?   |
| <b>RVA/Bat-wt/CHN/GLRL1/2005/G33P[48]</b>    | G33 | P[48] | I25 | R19 | C18 | M18 | A?   | N19  | T20  | E25  | H20  |
| RVA/Bat-wt/CMR/BatLy03/2014/G25P[43]         | G25 | P[43] | I15 | R16 | C8  | M15 | A26  | N8   | T11  | E23  | H10  |
| RVA/Bat-wt/SAU/KSA402/2012/G25P[43]          | G25 | P[43] | I15 | R16 | C8  | M15 | A26  | N8   | T11  | E23  | H10  |
| RVA/Bat-wt/KEN/KE4852/07/2007/G25P[6]        | G25 | P[6]  | I15 | R?  | C8  | M?  | A?   | N8   | T11  | E2   | H10  |

884 green, brown, dark grey and yellow).

## 885 **Supplementary Material Legends**

886

887 **Table S1.** RT-PCR oligonucleotides for the initial rotavirus screening against VP1

888 **Table S2.** Taxonomical annotation, sampling time and location, RVA PCR detection

889 information of the bat samples

890

891 **Table S3.** RVA-positive bat samples detected by targeted RT-PCR and undergone viral

892 metagenomics

893

894 **Table S4.** Examples of reassortments and unusual genotype constellations among bat

895 RVA strains and distinct RVA genotype constellations in the same bat species

896

897 **Table S5.** The Genbank accession numbers of the reference RVA strains used in the

898 study

899

900 **Figure S1.** RVA-positive bat families and species

901

902 **Figure S2.** Heatmap of pairwise nucleotide identities (NI) of the unusual RVA strains

903

904 Supplementary Material and Methods

905

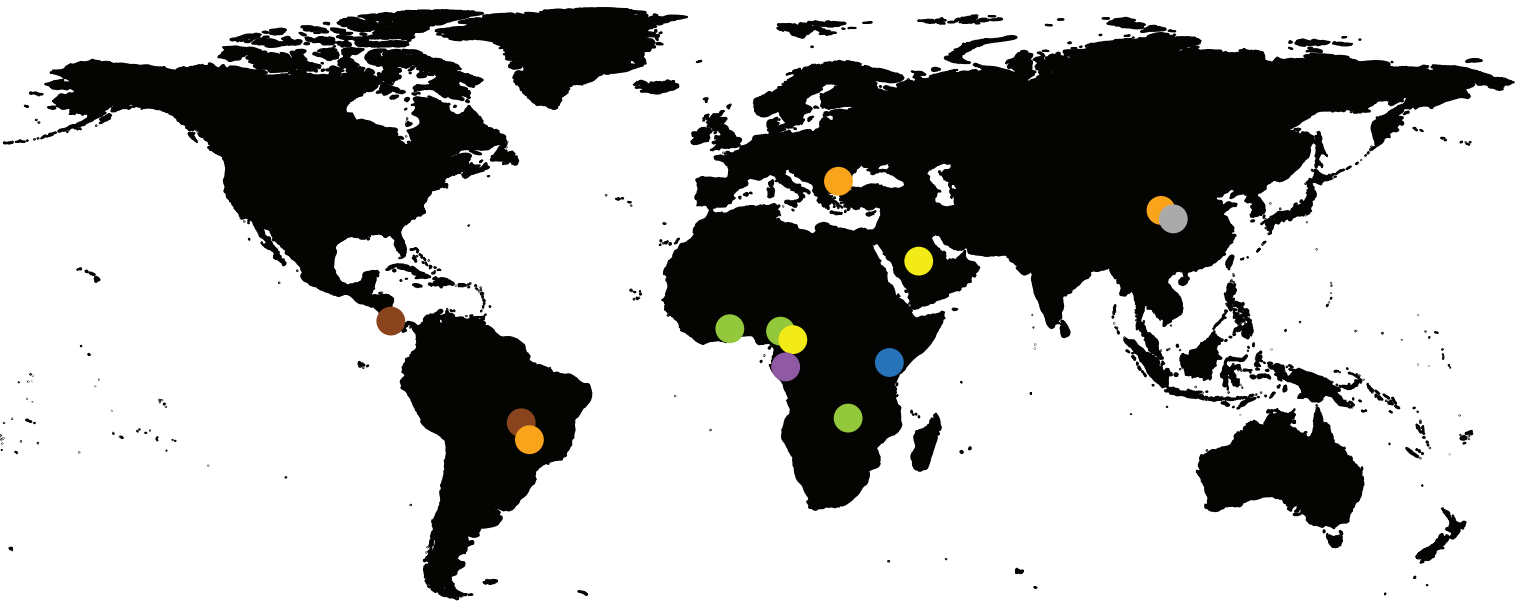

# VP1

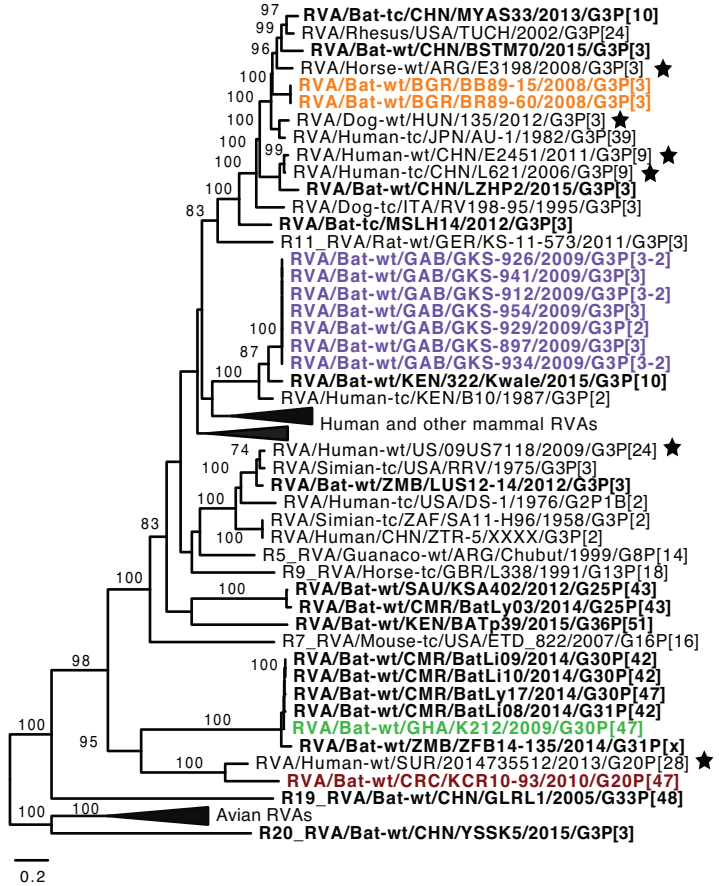

# VP2

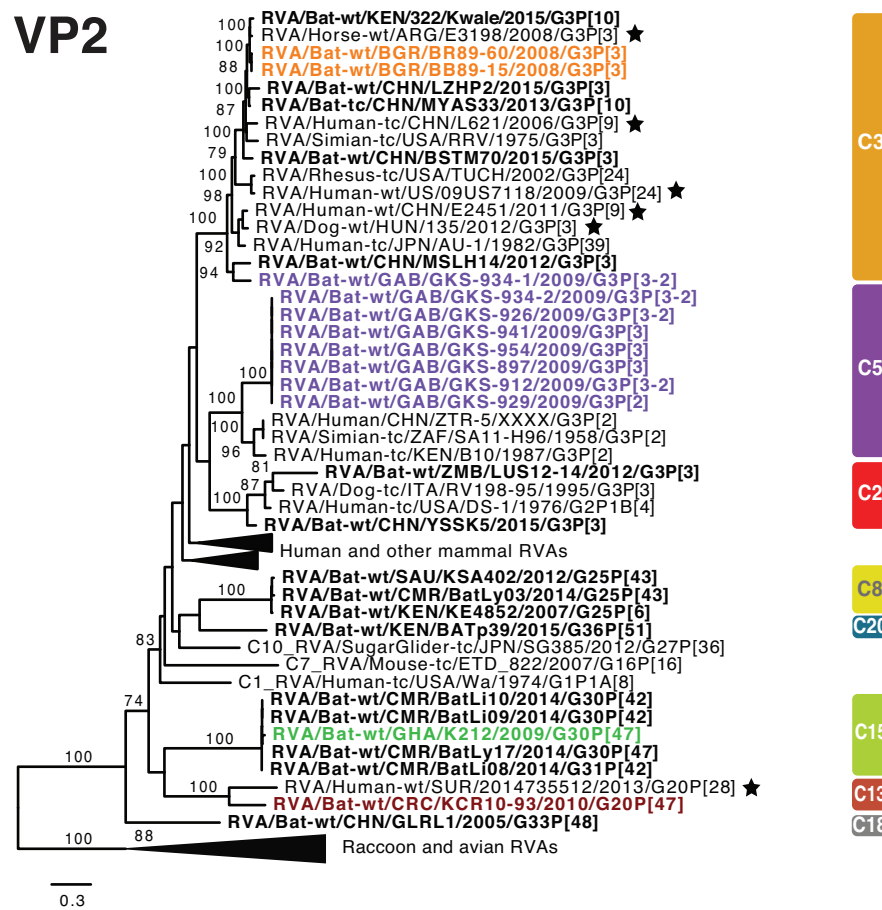

# VP3

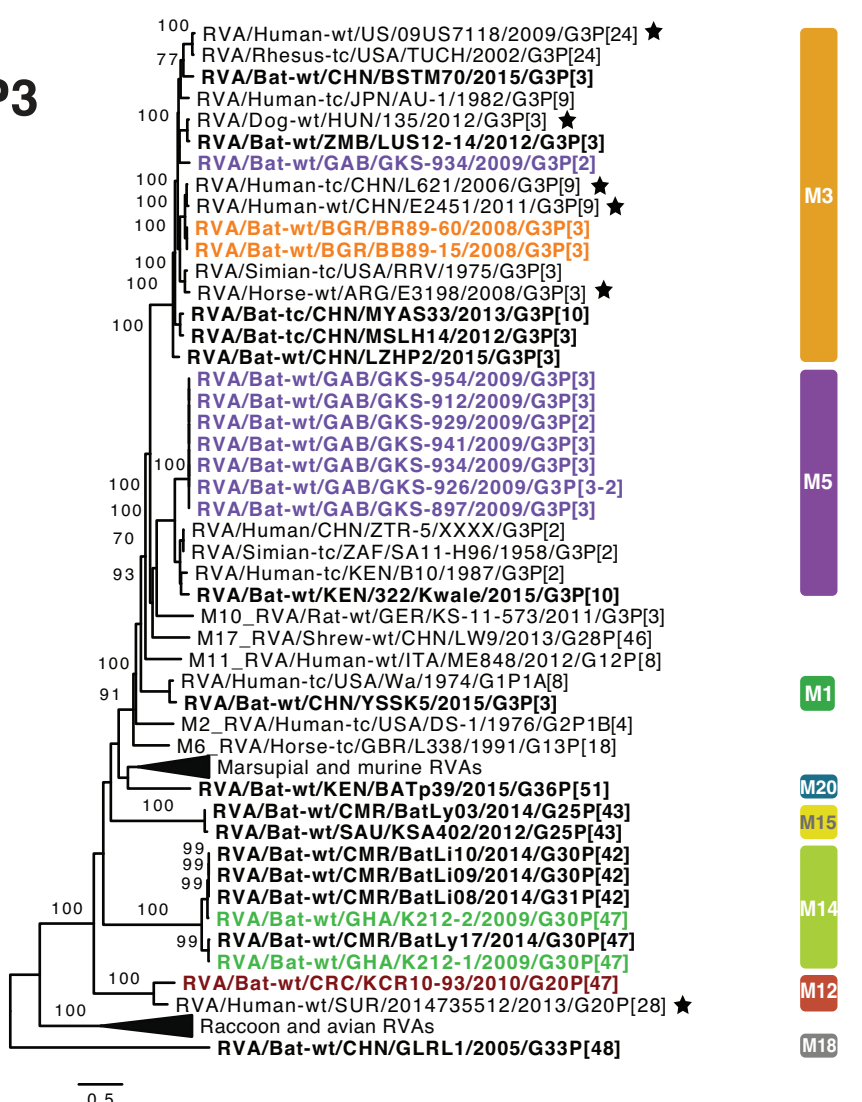

# NSP1

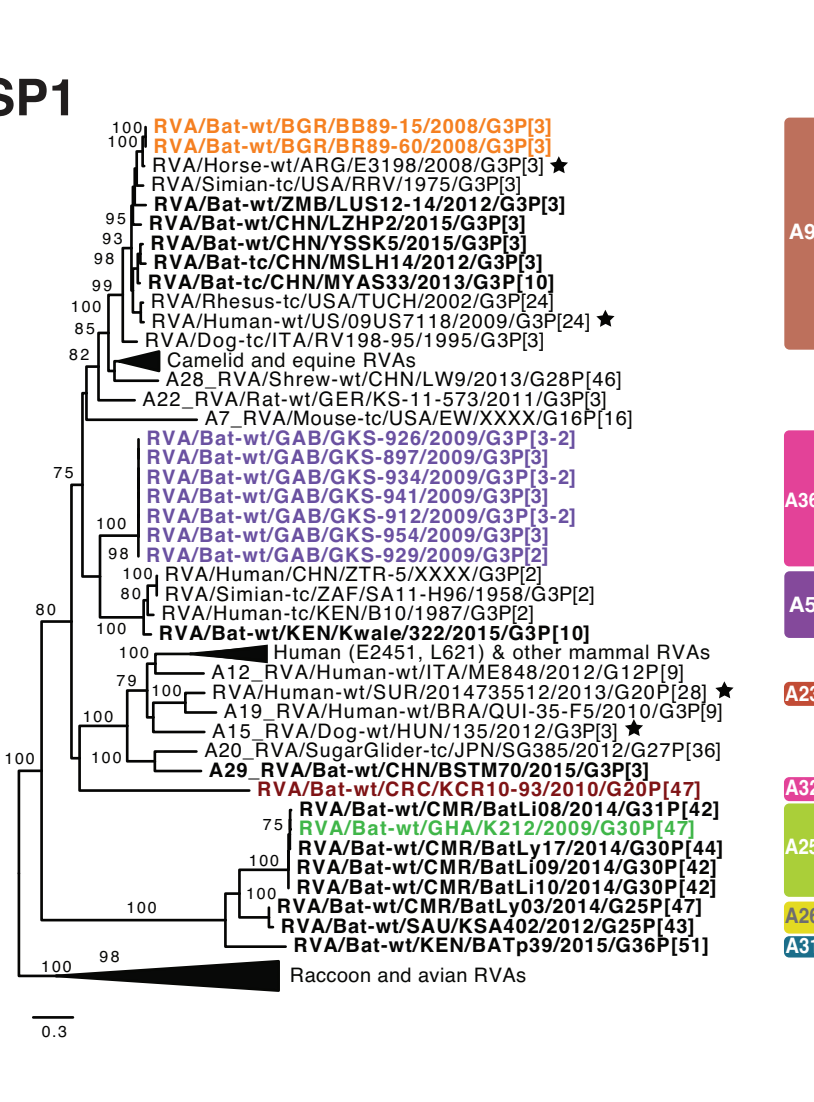



# VP4

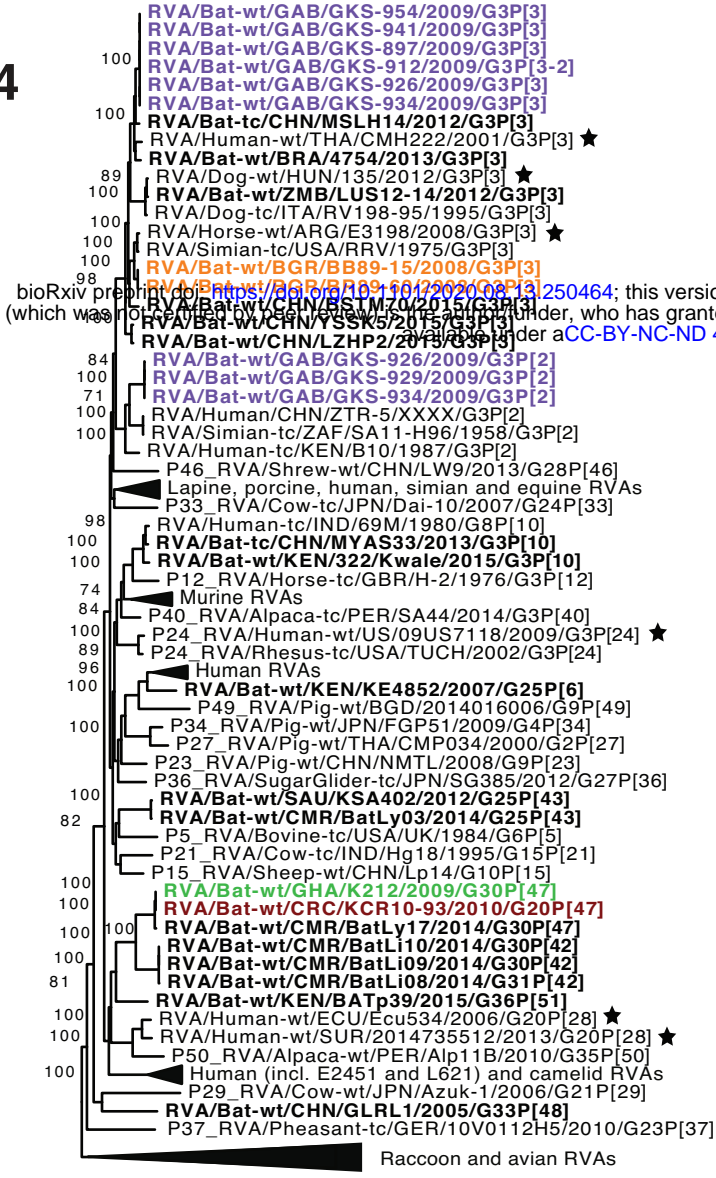

# VP6

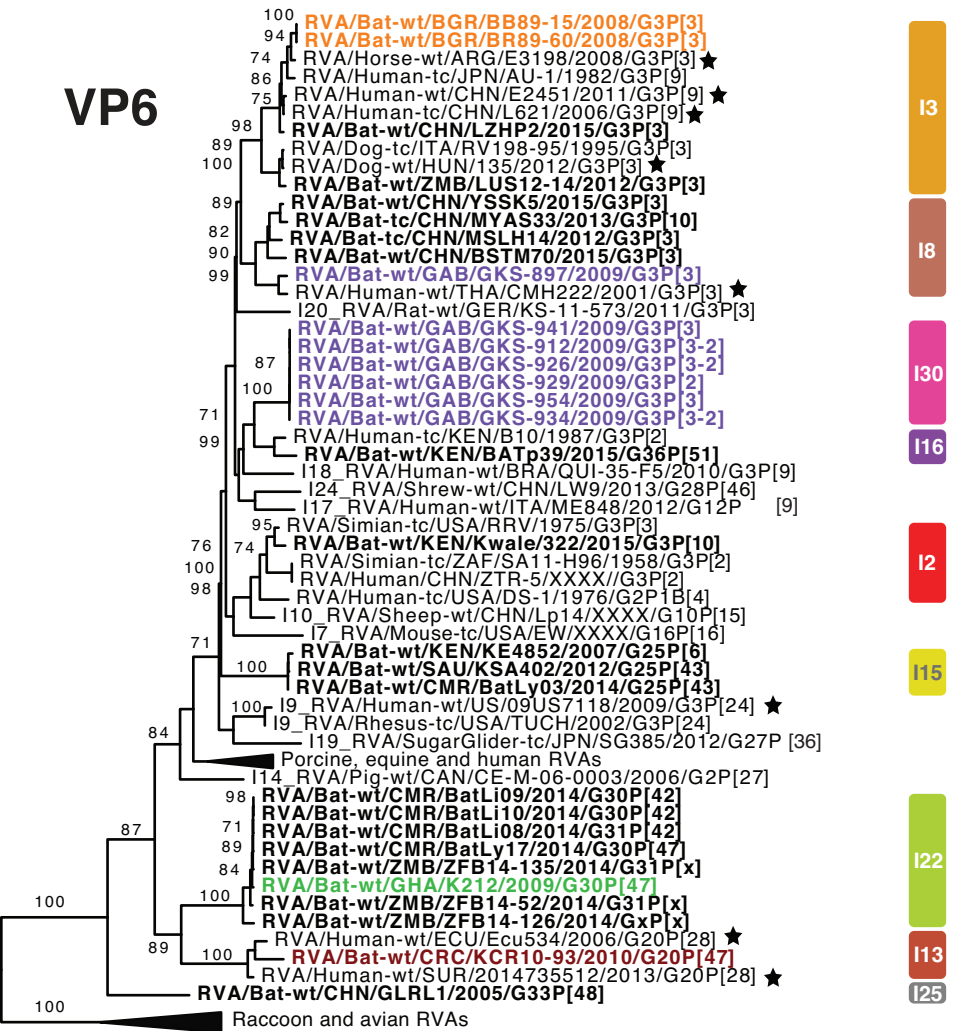

# VP7

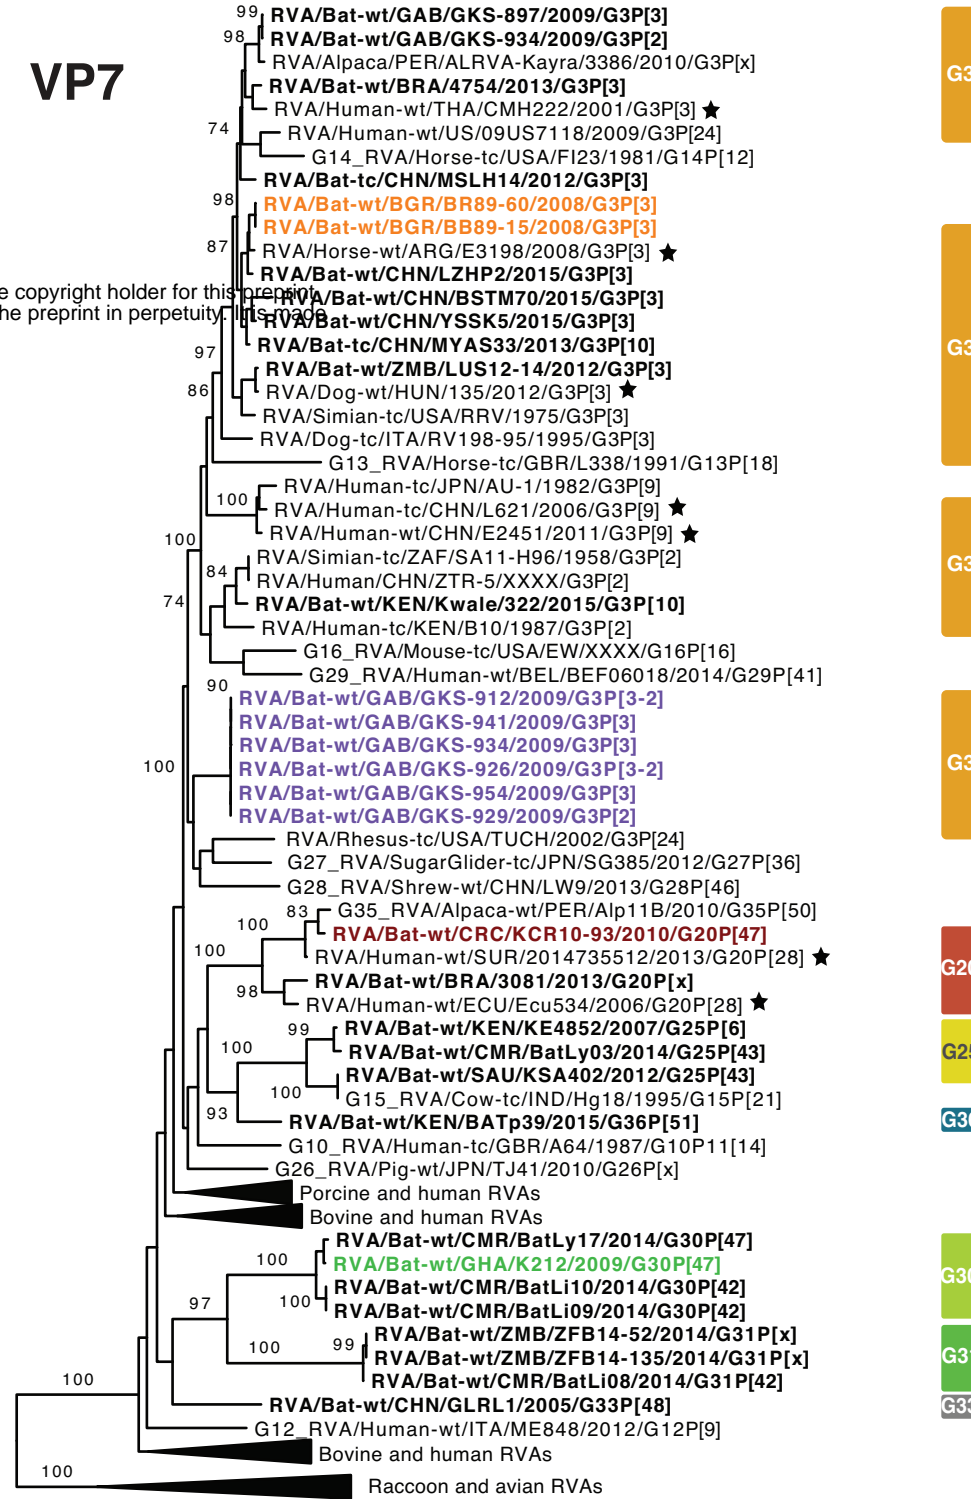

# NSP2

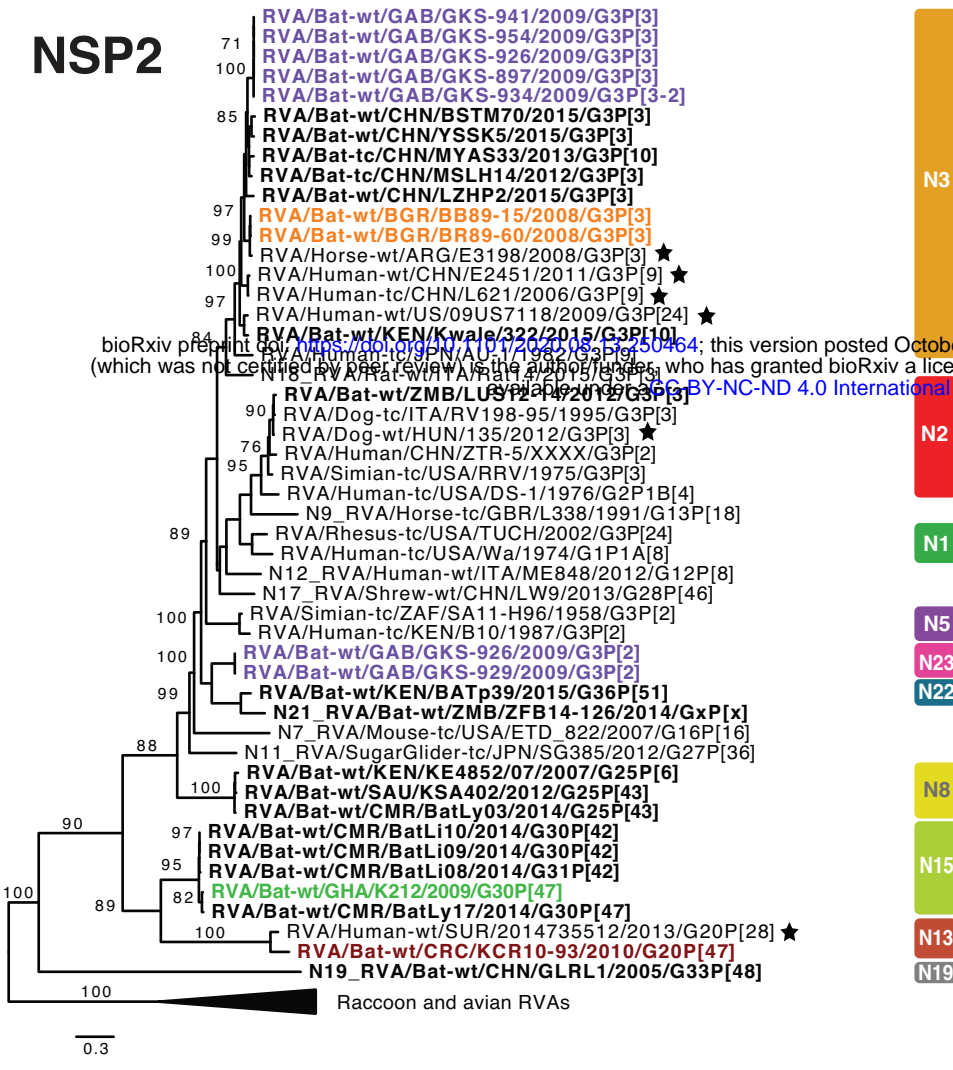

# NSP3

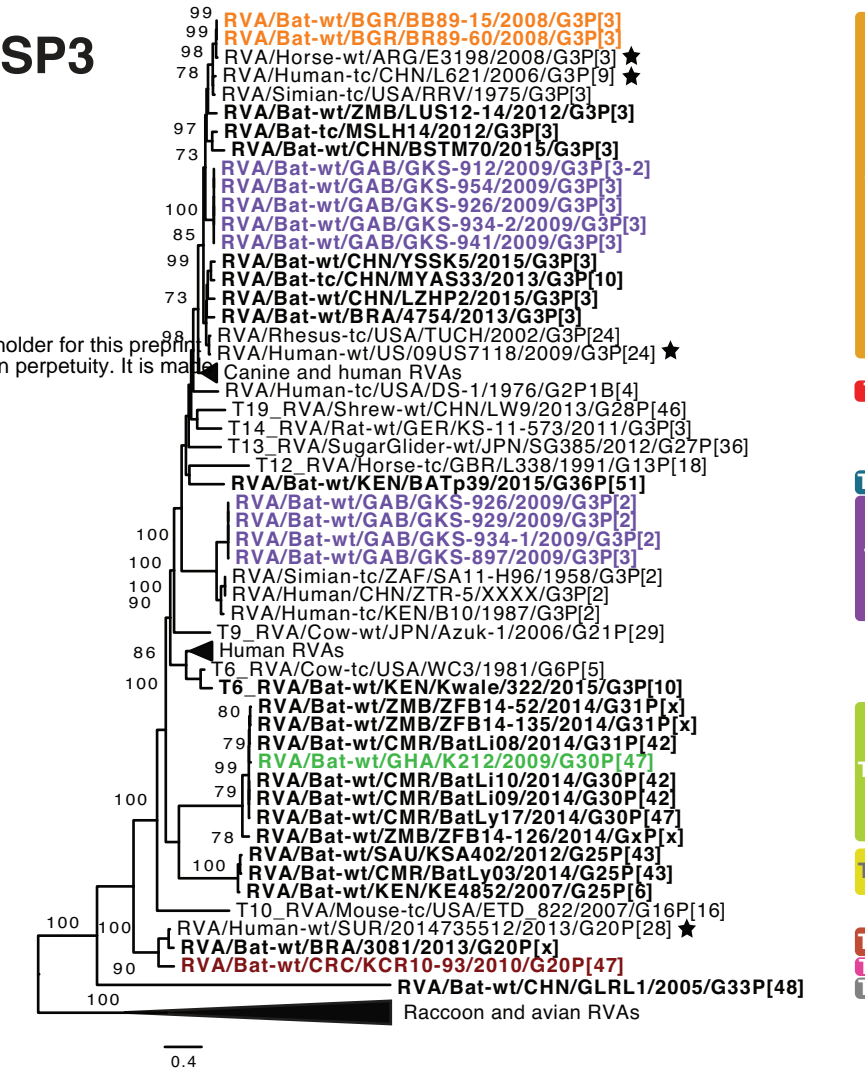

# NSP4

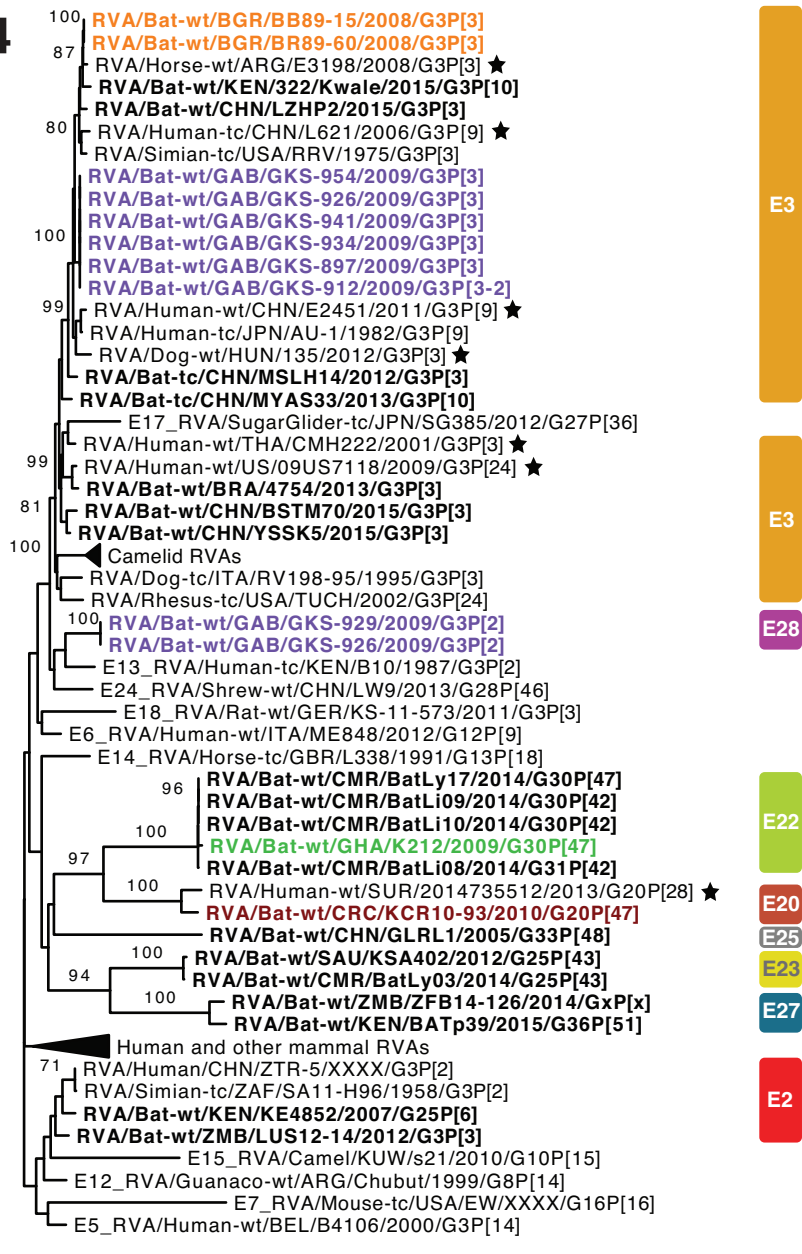

# NSP5

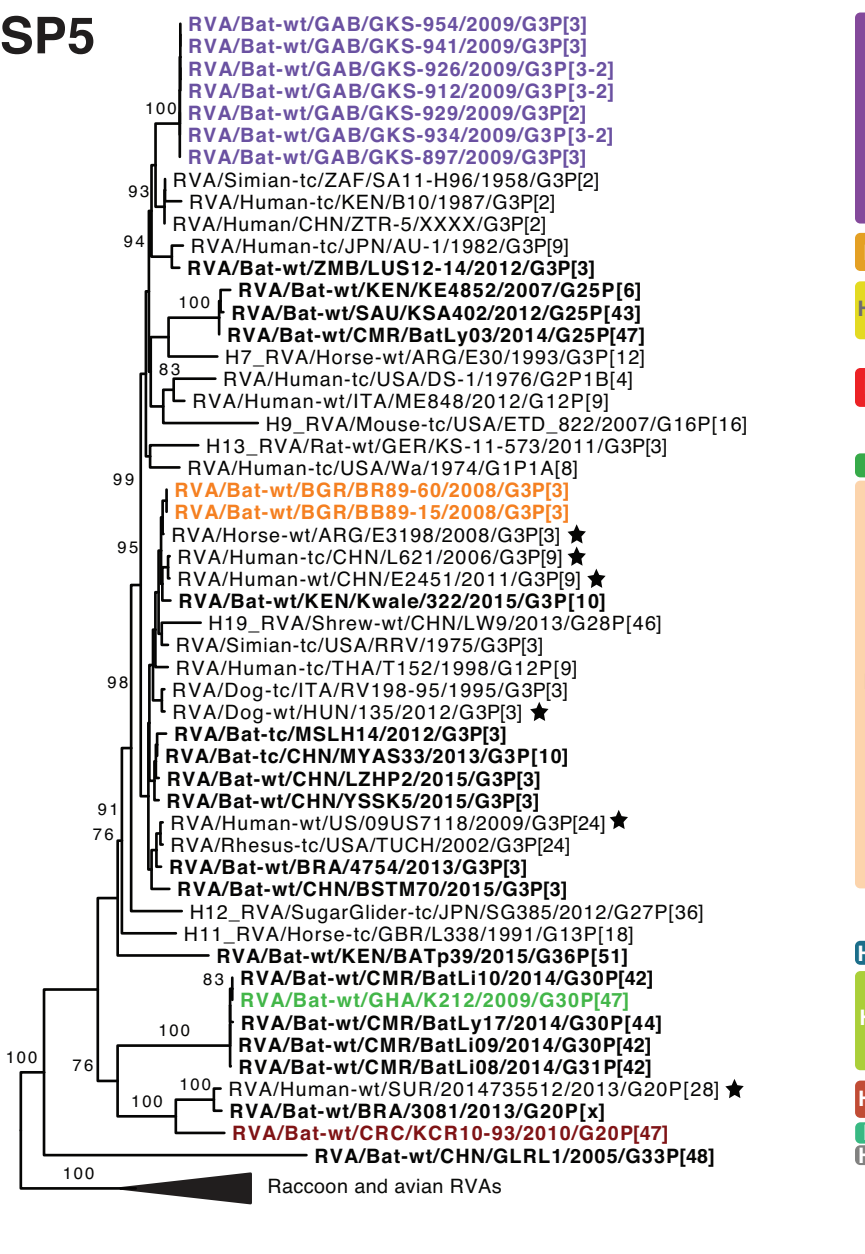

Source: https://www.biorxiv.org/content/10.1101/2020.08.13.250464v2.full.pdf
