# Supplementary material for: At least seven distinct rotavirus genotype constellations in bats with evidence of reassortment and zoonotic transmissions
Source: bioRxiv or medRxiv preprint supplement (doi:10.1101/2020.08.13.250464), 2020-10-26
Supplement: Supplementary file [file media-1.pdf]

**Table S1.** RT-PCR oligonucleotides for the initial rotavirus screening against VP1

| ID no.         | Sequence (5' → 3')         | Position               | Genome segment | Polarity | Assay type                               |
|----------------|----------------------------|------------------------|----------------|----------|------------------------------------------|
| PanRota-F1570  | TAYACIGAYGTITCICARTGGGA    | 1570-1593 <sup>a</sup> | VP1            | +        | Heminested RT-PCR, 1 <sup>st</sup> round |
| PanRota-R1922  | GCGTAGTTGTCGTCICCRTCBAC    | 1900-1922 <sup>a</sup> | VP1            | -        | 1 <sup>st</sup> and 2 <sup>nd</sup> rd   |
| PanRota-F1585a | CARTGGGATTCGTICAGCAYAYAC   | 1585-1610 <sup>a</sup> | VP1            | +        | 2 <sup>nd</sup> rd                       |
| PanRota-F1585b | CARTGGGACGCCAGICAACATAAYAC | 1585-1610 <sup>a</sup> | VP1            | +        | 2 <sup>nd</sup> rd                       |

ID, identification; RT-PCR, reverse transcription–PCR; <sup>a</sup>corresponding to Rotavirus A G11P[25] Dhaka6 VP1 (GenBank # EF560705); Variant forms of primers (marked consecutively with an alphabetic character in the last position) were mixed together equally and from then on treated as one single primer.

**Table S2.** Taxonomical annotation, sampling time and location, RVA PCR detection information of the bat samples

| Order-Family                | Species                              | No. of samples per sampling site and year |            |            |            |            |            |            |           | PCR positive (%) | Positive samples (ID)                                                                    |
|-----------------------------|--------------------------------------|-------------------------------------------|------------|------------|------------|------------|------------|------------|-----------|------------------|------------------------------------------------------------------------------------------|
|                             |                                      | total                                     | BGR 2008   | BGR 2009   | CRC 2010   | GAB 2009   | DEU 2008   | GHA 2009   | ROU 2008  |                  |                                                                                          |
| Chiroptera-Pteropodidae     | <i>Eidolon helvum</i>                | 226                                       |            |            |            |            |            | 226        |           | 1 (0.4%)         | K212                                                                                     |
|                             | <i>Micropteropus pusillus</i>        | 1                                         |            |            |            |            |            | 1          |           | 0 (0%)           |                                                                                          |
|                             | <i>Rousettus aegyptiacus</i>         | 10                                        |            |            |            | 8          |            | 2          |           | 0 (0%)           |                                                                                          |
| Chiroptera-Rhinolophidae    | <i>Rhinolophus blasii</i>            | 90                                        | 82         | 8          |            |            |            |            |           | 1 (1.1%)         | BB89-15                                                                                  |
|                             | <i>Rhinolophus euryale</i>           | 336                                       | 244        | 92         |            |            |            |            |           | 2 (0.6%)         | BBR89-2, BR89-60                                                                         |
|                             | <i>Rhinolophus ferrum-equinum</i>    | 52                                        | 45         | 6          |            |            |            |            | 1         | 0 (0%)           |                                                                                          |
|                             | <i>Rhinolophus hipposideros</i>      | 6                                         | 6          |            |            |            |            |            |           |                  |                                                                                          |
|                             | <i>Rhinolophus landeri</i>           | 1                                         |            |            |            |            |            | 1          |           | 0 (0%)           |                                                                                          |
|                             | <i>Rhinolophus mehelyi</i>           | 22                                        | 14         | 8          |            |            |            |            |           | 0 (0%)           |                                                                                          |
|                             | <i>Rhinolophus spec.</i>             | 6                                         |            |            |            | 6          |            |            |           | 0 (0%)           |                                                                                          |
| Chiroptera-Hipposideridae   | <i>Hipposideros cf ruber/caffer</i>  | 183                                       |            |            |            | 46         |            | 137        |           | 2 (1.1%)         | GKS-637, GKS-660                                                                         |
|                             | <i>Hipposideros cf spec</i>          | 2                                         |            |            |            |            |            | 2          |           | 0 (0%)           |                                                                                          |
|                             | <i>Hipposideros gigas</i>            | 67                                        |            |            |            | 67         |            |            |           | 10 (14.9%)       | GKS-897, GKS-912, GKS-926, GKS-929, GKS-934, GKS-941, GKS-942, GKS-953, GKS-954, GKS-955 |
|                             | <i>Hipposideros abae</i>             | 62                                        |            |            |            |            |            | 62         |           | 0 (0%)           |                                                                                          |
| Chiroptera-Nycteridae       | <i>Nycteris spec.</i>                | 3                                         |            |            |            |            |            | 3          |           | 0 (0%)           |                                                                                          |
| Chiroptera-Emballonuridae   | <i>Coleura afra</i>                  | 5                                         |            |            |            |            |            | 5          |           | 0 (0%)           |                                                                                          |
|                             | <i>Peropteryx kappleri</i>           | 5                                         |            |            | 5          |            |            |            |           | 0 (0%)           |                                                                                          |
| Chiroptera-Phyllostomidae   | <i>Anoura geoffroyi</i>              | 100                                       |            |            | 100        |            |            |            |           | 0 (0%)           |                                                                                          |
|                             | <i>Carollia castanea</i>             | 1                                         |            |            | 1          |            |            |            |           | 0 (0%)           |                                                                                          |
|                             | <i>Carollia perspicillata</i>        | 203                                       |            |            | 203        |            |            |            |           | 1 (0.5 %)        | KCR10-93                                                                                 |
|                             | <i>Enchisthenes hartii</i>           | 3                                         |            |            | 3          |            |            |            |           | 0 (0%)           |                                                                                          |
|                             | <i>Glossophaga commissarisi</i>      | 3                                         |            |            | 3          |            |            |            |           | 0 (0%)           |                                                                                          |
|                             | <i>Glossophaga soricina</i>          | 22                                        |            |            | 22         |            |            |            |           | 0 (0%)           |                                                                                          |
| Chiroptera-Mormoopidae      | <i>Pteronotus parnellii</i>          | 21                                        |            |            | 21         |            |            |            |           | 0 (0%)           |                                                                                          |
| Chiroptera-Natalidae        | <i>Natalus lanatus</i>               | 3                                         |            |            | 3          |            |            |            |           | 0 (0%)           |                                                                                          |
| Chiroptera-Vespertilionidae | <i>Barbastella barbastellus</i>      | 13                                        | 12         |            |            |            |            |            | 1         | 0 (0%)           |                                                                                          |
|                             | <i>Miniopterus inflatus</i>          | 2                                         |            |            |            | 2          |            |            |           | 0 (0%)           |                                                                                          |
|                             | <i>Miniopterus schreibersii</i>      | 77                                        | 39         |            |            |            |            |            | 38        | 0 (0%)           |                                                                                          |
|                             | <i>Myotis brandtii</i>               | 17                                        |            |            |            |            | 17         |            |           | 0 (0%)           |                                                                                          |
|                             | <i>Myotis alcathoe</i>               | 2                                         | 2          |            |            |            |            |            |           | 0 (0%)           |                                                                                          |
|                             | <i>Myotis bechsteinii</i>            | 57                                        | 32         |            |            |            | 25         |            |           | 0 (0%)           |                                                                                          |
|                             | <i>Myotis capaccini</i>              | 1                                         | 1          |            |            |            |            |            |           | 0 (0%)           |                                                                                          |
|                             | <i>Myotis dasycneme</i>              | 149                                       |            |            |            |            | 149        |            |           | 0 (0%)           |                                                                                          |
|                             | <i>Myotis daubentonii</i>            | 110                                       | 7          |            |            |            | 103        |            |           | 1 (0.9%)         | SW78-39                                                                                  |
|                             | <i>Myotis emarginatus</i>            | 5                                         | 5          |            |            |            |            |            |           | 0 (0%)           |                                                                                          |
|                             | <i>Myotis myotis</i>                 | 77                                        | 3          |            |            |            | 60         |            | 14        | 0 (0%)           |                                                                                          |
|                             | <i>Myotis mystacinus</i>             | 51                                        |            |            |            |            | 51         |            |           | 0 (0%)           |                                                                                          |
|                             | <i>Myotis nattereri</i>              | 27                                        | 2          |            |            |            | 25         |            |           | 0 (0%)           |                                                                                          |
|                             | <i>Myotis oxygnathus</i>             | 22                                        | 1          |            |            |            |            |            | 21        | 0 (0%)           |                                                                                          |
|                             | <i>Nyctalus leisleri</i>             | 3                                         | 3          |            |            |            |            |            |           | 0 (0%)           |                                                                                          |
|                             | <i>Nyctalus noctula</i>              | 11                                        |            |            |            |            | 2          |            | 9         | 0 (0%)           |                                                                                          |
|                             | <i>Pipistrellus cf nanus/nanulus</i> | 3                                         |            |            |            |            |            | 3          |           | 0 (0%)           |                                                                                          |
|                             | <i>Pipistrellus nathusii</i>         | 2                                         |            |            |            |            | 2          |            |           | 0 (0%)           |                                                                                          |
|                             | <i>Pipistrellus pipistrellus</i>     | 37                                        |            |            |            |            | 37         |            |           | 0 (0%)           |                                                                                          |
|                             | <i>Pipistrellus pygmaeus</i>         | 29                                        | 2          |            |            |            | 27         |            |           | 0 (0%)           |                                                                                          |
|                             | <i>Pipistrellus spec.</i>            | 6                                         |            |            |            |            |            | 6          |           | 0 (0%)           |                                                                                          |
| <i>Plecotus auritus</i>     | 5                                    | 2                                         |            |            |            | 3          |            |            | 0 (0%)    |                  |                                                                                          |
| <i>Plecotus austriacus</i>  | 1                                    |                                           |            |            |            | 1          |            |            | 0 (0%)    |                  |                                                                                          |
| Chiroptera-Molossidae       | <i>Mops spec.</i>                    | 2                                         |            | 1          |            |            |            | 1          |           | 0 (0%)           |                                                                                          |
|                             | <b>Total (46 species)</b>            | <b>2142</b>                               | <b>502</b> | <b>115</b> | <b>361</b> | <b>129</b> | <b>502</b> | <b>449</b> | <b>84</b> | <b>18 (0.8%)</b> |                                                                                          |

Country: BGR = Bulgaria; CRC = Costa Rica; GAB = Gabon; DEU = Germany; GHA = Ghana; ROU = Romania

**Table S3.** RVA-positive bat samples detected by targeted RT-PCR and undergone viral metagenomics

| Sample   | Host                          | Country    | Place            | Year |
|----------|-------------------------------|------------|------------------|------|
| BBR89-2  | <i>Rhinolophus euryale</i>    | Bulgaria   | Bratanova        | 2008 |
| BB89-15  | <i>Rhinolophus blasii</i>     |            | Elenas Cave      |      |
| BR89-60  | <i>Rhinolophus euryale</i>    |            | Roman Horse Cave |      |
| SW78-39  | <i>Myotis daubentonii</i>     | Germany    | Wahlstorf, SH    | 2008 |
| GKS-660  | <i>Hipposideros caffer</i>    | Gabon      | Zadie            | 2009 |
| GKS-637  |                               |            |                  |      |
| GKS-897  | <i>Hipposideros gigas</i>     | Gabon      | Faucon           | 2009 |
| GKS-912  |                               |            |                  |      |
| GKS-926  |                               |            |                  |      |
| GKS-929  |                               |            |                  |      |
| GKS-934  |                               |            |                  |      |
| GKS-941  |                               |            |                  |      |
| GKS-942  |                               |            |                  |      |
| GKS-953  |                               |            |                  |      |
| GKS-954  |                               |            |                  |      |
| GKS-955  |                               |            |                  |      |
| K212     | <i>Eidolon helvum</i>         | Ghana      | Kumasi           | 2009 |
| KCR10-93 | <i>Carollia perspicillata</i> | Costa Rica | Orosi            | 2010 |

**Table S4.** a. Examples of reassortments among bat RVA strains, b. Examples of bat RVA strains with unusual genotype constellations, potentially resulting from (multiple) reassortment events, c. Examples of distinct RVA genotype constellations in the same bat species

| <b>a.</b> | Strains                            | VP7 | VP4   | VP6 | VP1 | VP2 | VP3 | NSP1 | NSP2 | NSP3 | NSP4 | NSP5 | Host Species                    | Host Family      | Diet |
|-----------|------------------------------------|-----|-------|-----|-----|-----|-----|------|------|------|------|------|---------------------------------|------------------|------|
|           | RVA/Bat-wt/BGR/BB89-15/2008/G3P[3] | G3  | P[3]  | I3  | R3  | C3  | M3  | A9   | N3   | T3   | E3   | H6   | <i>Rhinolophus blasii</i>       | Rhinolophidae    | I    |
|           | RVA/Bat-wt/BGR/BB89-60/2008/G3P[3] | G3  | P[3]  | I3  | R3  | C3  | M3  | A9   | N3   | T3   | E3   | H6   | <i>Rhinolophus euryale</i>      | Rhinolophidae    | I    |
|           | RVA/Bat-wt/CHN/LZHP2/2015/G3P[3]   | G3  | P[3]  | I3  | R3  | C3  | M3  | A9   | N3   | T3   | E3   | H6   | <i>Hipposideros pomona</i>      | Hipposideridae   | I    |
|           | RVA/Bat-tc/CHN/MSLH14/2012/G3P[3]  | G3  | P[3]  | I8  | R3  | C3  | M3  | A9   | N3   | T3   | E3   | H6   | <i>Rhinolophus hipposideros</i> | Rhinolophidae    | I    |
|           | RVA/Bat-tc/CHN/MYAS33/2013/G3P[10] | G3  | P[10] | I8  | R3  | C3  | M3  | A9   | N3   | T3   | E3   | H6   | <i>Aselliscus stoliczkanus</i>  | Hipposideridae   | I    |
|           | RVA/Bat-wt/CHN/BSTM70/2015/G3P[3]  | G3  | P[3]  | I8  | R3  | C3  | M3  | A29  | N3   | T3   | E3   | H6   | <i>Taphozous melanopogon</i>    | Emballonuridae   | I/F  |
|           | RVA/Bat-wt/CHN/YSSK5/2015/G3P[3]   | G3  | P[3]  | I8  | R20 | C2  | M1  | A9   | N3   | T3   | E3   | H6   | <i>Scotophilus kuhlii</i>       | Vespertilionidae | I    |

  

| <b>b.</b> | Strains                             | VP7 | VP4   | VP6 | VP1 | VP2 | VP3 | NSP1 | NSP2 | NSP3 | NSP4 | NSP5 | Host Species                 | Host Family      | Diet |
|-----------|-------------------------------------|-----|-------|-----|-----|-----|-----|------|------|------|------|------|------------------------------|------------------|------|
|           | RVA/Bat-wt/ZMB/LUS12-14/2012/G3P[3] | G3  | P[3]  | I3  | R2  | C2  | M3  | A9   | N2   | T3   | E2   | H3   | <i>Rhinolophus simulator</i> | Rhinolophidae    | I    |
|           | RVA/Bat-wt/CHN/YSSK5/2015/G3P[3]    | G3  | P[3]  | I8  | R20 | C2  | M1  | A9   | N3   | T3   | E3   | H6   | <i>Scotophilus kuhlii</i>    | Vespertilionidae | I    |
|           | RVA/Bat/KEN/322/Kwale/2015/G3P[10]  | G3  | P[10] | I2  | R8  | C3  | M5  | A5   | N3   | T6   | E3   | H6   | <i>Taphozous mauritanus</i>  | Emballonuridae   | I    |

  

| <b>c.</b> | Strains                              | VP7 | VP4   | VP6 | VP1 | VP2 | VP3 | NSP1 | NSP2 | NSP3 | NSP4 | NSP5 | Host Species          | Host Family  | Diet |
|-----------|--------------------------------------|-----|-------|-----|-----|-----|-----|------|------|------|------|------|-----------------------|--------------|------|
|           | RVA/Bat-wt/CMR/BatLy17/2014/G30P[47] | G30 | P[47] | I22 | R15 | C15 | M14 | A25  | N15  | T17  | E22  | H17  | <i>Eidolon helvum</i> | Pteropodidae | F    |
|           | RVA/Bat-wt/GHA/K212/2009/G30P[47]    | G30 | P[47] | I22 | R15 | C15 | M14 | A25  | N15  | T17  | E22  | H17  | <i>Eidolon helvum</i> | Pteropodidae | F    |
|           | RVA/Bat-wt/CMR/BatLy03/2014/G25P[43] | G25 | P[43] | I15 | R16 | C8  | M15 | A26  | N8   | T11  | E23  | H10  | <i>Eidolon helvum</i> | Pteropodidae | F    |
|           | RVA/Bat/SAU/KSA402/2012/G25P[43]     | G25 | P[43] | I15 | R16 | C8  | M15 | A26  | N8   | T11  | E23  | H10  | <i>Eidolon helvum</i> | Pteropodidae | F    |

**Table S5.** The Genbank accession numbers of the reference RVA strains used in the study

| Strains                                  | VP1        | VP2        | VP3        | VP4        | NSP1       | VP6        | NSP3       | VP7        | NSP2       | NSP4       | NSP5       |
|------------------------------------------|------------|------------|------------|------------|------------|------------|------------|------------|------------|------------|------------|
| RVA/Alpacatc/PER/SA44/2014/G3P40         |            |            |            | KT935478   |            |            |            |            |            |            |            |
| RVA/Alpacatc/PER/356/2010/G3P14          |            |            |            | KT878993.1 |            |            |            |            |            |            |            |
| RVA/Alpacatc/PER/Alp11B/2010/G35P50      |            |            |            | KY971955.1 |            |            |            | KY971977.1 |            |            |            |
| RVA/Batwt/KEN/322/Kwale/2015/G3P10       | MH285826.1 | MH285827.1 | MH285828.1 | MH285829.1 | MH285830.1 | MH285831.1 | MH285832.1 | MH285834.1 | MH285833.1 | MH285835.1 | MH285836.1 |
| RVA/Batwt/KEN/BATp39/2015/G36P51         | MH285837.1 | MH285838.1 | MH285839.1 | MH285840.1 | MH285841.1 | MH285842.1 | MH285843.1 | MH285845.1 | MH285844.1 | MH285846.1 | MH285847.1 |
| RVA/Batwt/SAU/KSA402/2012/G25P43         | KX420939.1 | KX420940.1 | KX420941.1 | KX420942.1 | KX420943.1 | KX420944.1 | KX420947.1 | KX420946.1 | KX420945.1 | KX420949.1 | KX420948.1 |
| RVA/Batwt/CHN/MSLH14/2012/G3P3           | KC960619.1 | KC960620.1 | KC960621.1 | KC960622.1 | KC960625.1 | KC960623.1 | KC960627.1 | KC960626.1 | KC960624.1 | KC960628.1 | KC960629.1 |
| RVA/Batwt/CHN/MYAS33/2013/G3P10          | KJ020891.1 | KJ020892.1 | KJ020893.1 | KF649187.1 | KJ020887.1 | KJ020894.1 | KJ020889.1 | KF649188.1 | KJ020888.1 | KJ020890.1 | KF649186.1 |
| RVA/Batwt/BRA/3081/2013/G20Px            |            |            |            | KR106166.1 |            |            | KR106164.1 | KR106163.1 |            |            | KR106165.1 |
| RVA/Batwt/BRA/4754/2013/G3P3             |            |            |            | KR106161.1 |            |            |            | KR106162.1 |            | KR106159.1 | KR106160.1 |
| RVA/Batwt/CHN/BSTM70/2015/G3P3           | KX814924.1 | KX814925.1 | KX814926.1 | KX814922.1 | KX814927.1 | KX814923.1 | KX814928.1 | KX814929.1 | KX814921.1 | KX814930.1 | KX814931.1 |
| RVA/Batwt/CHN/GLRL1/2005/G33P48          | KX814935.1 | KX814936.1 | KX814937.1 | KX814933.1 |            | KX814934.1 | KX814939.1 | KX814932.1 | KX814938.1 | KX814941.1 | KX814940.1 |
| RVA/Batwt/CHN/LZHP2/2015/G3P3            | KX814945.1 | KX814946.1 | KX814947.1 | KX814943.1 | KX814948.1 | KX814944.1 | KX814950.1 | KX814942.1 | KX814949.1 | KX814951.1 | KX814952.1 |
| RVA/Batwt/CHN/YSSK5/2015/G3P3            | KX814956.1 | KX814957.1 | KX814958.1 | KX814954.1 | KX814959.1 | KX814955.1 | KX814961.1 | KX814953.1 | KX814960.1 | KX814962.1 | KX814963.1 |
| RVA/Batwt/CMR/BatLi08/2014/G31P42        | KX268765.1 | KX268766.1 | KX268767.1 | KX268768.1 | KX268771.1 | KX268769.1 | KX268773.1 | KX268770.1 | KX268772.1 | KX268774.1 | KX268775.1 |
| RVA/Batwt/CMR/BatLi09/2014/G30P42        | KX268754.1 | KX268755.1 | KX268756.1 | KX268757.1 | KX268760.1 | KX268758.1 | KX268762.1 | KX268759.1 | KX268761.1 | KX268763.1 | KX268764.1 |
| RVA/Batwt/CMR/BatLi10/2014/G30P42        | KX268743.1 | KX268744.1 | KX268745.1 | KX268746.1 | KX268749.1 | KX268747.1 | KX268751.1 | KX268748.1 | KX268750.1 | KX268752.1 | KX268753.1 |
| RVA/Batwt/CMR/BatLy03/2014/G25P43        | KX268776.1 | KX268777.1 | KX268778.1 | KX268779.1 | KX268782.1 | KX268780.1 | KX268784.1 | KX268781.1 | KX268783.1 | KX268785.1 | KX268786.2 |
| RVA/Batwt/CMR/BatLy17/2014/G30P47        | KX268787.1 | KX268789.1 | KX268790.1 | KX268788.1 | KX268793.1 | KX268791.1 | KX268795.1 | KX268792.1 | KX268794.1 | KX268796.1 | KX268797.1 |
| RVA/Batwt/KEN/KE4852/2007/G25P6          |            | GU983673.1 |            | GU983674.1 |            | GU983675.1 | GU983678.1 | GU983676.1 | GU983677.1 | GU983679.1 | GU983680.1 |
| RVA/Batwt/ZMB/LUS12-14/2012/G3P3         | LC158119.1 | LC158120.1 | LC158121.1 | LC158117.1 | LC158122.1 | LC158118.1 | LC158116.1 | LC158123.1 | LC158124.1 | LC158125.1 | LC158126.1 |
| RVA/Batwt/ZMB/ZFB14-126/2014/GxPx        |            |            |            |            |            | LC277165.1 | LC277163.1 |            | LC277162.1 | LC277164.1 |            |
| RVA/Batwt/ZMB/ZFB14-135/2014/G31Px       | LC277168.1 |            |            |            |            | LC277169.1 | LC277167.1 | LC277170.1 |            |            |            |
| RVA/Batwt/ZMB/ZFB14-52/2014/G31Px        |            |            |            |            |            | LC277160.1 | LC277159.1 | LC277161.1 |            |            |            |
| RVA/Camel/KUW/s21/2010/G10P15            |            |            |            | JX968470.2 |            |            |            |            |            |            |            |
| RVA/Camelwt/SDN/MRC-DPRU447/2009/G8P1    |            |            |            |            | KC257086.1 |            |            |            |            | KC257089.1 |            |
| RVA/Chicken-tc/DEU/02V0002G3/2002/G19P30 | FJ169853.1 | FJ169854.1 | FJ169855.1 | FJ169856.1 | FJ169857.1 | FJ169858.1 | FJ169859.1 | FJ169861.1 | FJ169860.1 | FJ169862.1 | FJ169863.1 |
| RVA/Chicken-tc/GBR/Ch-1/197x/G19P17      |            |            |            |            |            | D82970.1   |            | AB080738.1 |            |            |            |
| RVA/CommonGullwt/JPN/Ho374/2013/G28P39   | LC088218.1 | LC088219.1 | LC088220.1 | LC088221.1 | LC088224.1 | LC088222.1 | LC088225.1 | LC088226.1 | LC088223.1 | LC088227.1 | LC088228.1 |
| RVA/Cow-tc/GBR/PP-1/1976/G3P7            |            |            |            |            |            |            |            | AF427124.1 |            | AF427521.1 |            |
| RVA/Bovine-tc/USA/UK/1984/G6P5           |            |            |            | JF693051.1 |            |            |            |            |            |            |            |
| RVA/Cow-tc/IND/Hg18/1995/G15P21          |            |            |            | AF237665.1 |            |            |            | AF237666.1 |            |            |            |
| RVA/Cow-tc/JPN/Dai-10/2007/G24P33        | AB573070.1 | AB573071.1 | AB573072.1 | AB513836.1 | AB573074.1 | AB573073.1 | AB573075.1 | AB573076.1 | AB513837.1 | AB573077.1 | AB573078.1 |
| RVA/Cow-tc/THA/A5-13/G8P1                |            |            |            | LC133528.1 |            |            |            |            |            |            |            |
| RVA/Cow-tc/USA/B223/G10P11               |            |            |            | LC133550.1 |            |            |            |            |            |            |            |
| RVA/Cow-tc/USA/NCDV/1971/G6P1            | DQ870493.1 | DQ870494.1 |            |            |            |            |            |            |            |            |            |
| RVA/Cow-tc/USA/WC3/1981/G6P5             | EF560615.1 | EF560616.1 | EF560617.1 |            | EF990699.1 |            | EF990701.1 |            | EF990700.1 |            | EF990702.1 |
| RVA/Cowwt/JPN/Azuk-1/2006/G21P29         |            |            |            | LC553631.1 |            |            | LC553636.1 |            |            |            |            |

|                                           |            |            |            |            |            |            |            |            |            |            |            |
|-------------------------------------------|------------|------------|------------|------------|------------|------------|------------|------------|------------|------------|------------|
| RVA/Dog-wt/HUN/135/2012/G3P3              | KJ875791.1 | KJ875792.1 | KJ875793.1 | KJ875794.1 | KJ875797.1 | KJ875795.1 | KJ875799.1 | KJ875796.1 | KJ875798.1 | KJ875800.1 | KJ875801.1 |
| RVA/Dog-tc/ITA/RV198-95/1995/G3P3         | HQ661134.1 | HQ661135.1 | HQ661136.1 | HQ661137.1 | HQ661140.1 | HQ661138.1 | HQ661142.1 | HQ661139.1 | HQ661141.1 | HQ661143.1 | HQ661144.1 |
| RVA/Guanaco-wt/ARG/Chubut/1999/G8P14      | FJ347100.1 | FJ347101.1 | FJ347102.1 | FJ347103.1 | FJ347106.1 | FJ347104.1 | FJ347108.1 | FJ347105.1 | FJ347107.1 | FJ347109.1 | FJ347110.1 |
| RVA/Horse-tc/USA/F114/1981/G3P12          |            |            |            |            | KM454487.1 |            |            |            |            |            |            |
| RVA/Horse-tc/GBR/H-2/1976/G3P12           |            |            |            | KM454495.1 |            |            |            |            |            |            |            |
| RVA/Horse-tc/GBR/L338/1991/G13P18         | JF712555.1 | JF712556.1 | JF712557.1 | JF712558.1 | JF712561.1 | JF712559.1 | JF712560.1 | JF712562.1 | JF712563.1 | JF712564.1 | JF712565.1 |
| RVA/Horse-tc/USA/F123/1981/G14P12         |            |            |            |            |            |            |            | KM454508.1 |            |            |            |
| RVA/Horse-wt/ARG/E30/1993/G3P12           |            |            |            |            |            |            |            |            |            |            | JF712576.1 |
| RVA/Horse-wt/ARG/E3198/2008/G3P3          | JX036365.1 | JX036366.1 | JX036367.1 | JX036368.1 | JX036371.1 | JX036369.1 | JX036373.1 | JX036370.1 | JX036372.1 | JX036374.1 | JX036375.1 |
| RVA/Human-wt/ITA/ME848/2012/G12P8         | KR632623.1 | KR632624.1 | KR632625.1 | KR632621.1 | KR632626.1 | KR632622.1 | KR632628.1 | KR632620.1 | KR632627.1 | KR632629.1 | KR632630.1 |
| RVA/Human-CHN/ZTR-5/XXXX/G3P2             | JF896465.1 | JF896466.1 | JF896467.1 | JF896468.1 | JF896471.1 | JF896469.1 | JF896473.1 | JF896470.1 | JF896472.1 | JF896474.1 | JF896475.1 |
| RVA/Human-tc/KEN/B10/1987/G3P2            | HM627553.1 | HM627554.1 | HM627555.1 | HM627556.1 | HM627559.1 | HM627557.1 | HM627561.1 | HM627558.1 | HM627560.1 | HM627562.1 | HM627563.1 |
| RVA/Human-tc/CHN/L621/2006/G3P9           | JX946159.1 | JX946160.1 | JX946161.1 | EU708574.1 | JX946163.1 | JX946162.1 | JX946165.1 | EU708588.1 | JX946164.1 | JX946166.1 | JX946167.1 |
| RVA/Human-tc/GBR/A64/1987/G10P1114        |            |            |            |            |            |            |            | EF672567.1 |            |            |            |
| RVA/Human-tc/GBR/ST3/1975/G4P2            |            |            |            |            |            |            |            | EF672616.1 |            |            |            |
| RVA/Human-tc/IND/116E/1985/G9P11          |            |            |            | FJ361204.1 |            |            |            |            |            |            |            |
| RVA/Human-tc/IND/69M/1980/G8P10           |            |            |            | M60600.1   |            |            |            | EF672560.1 |            |            |            |
| RVA/Human-tc/JPN/AU-1/1982/G3P9           | DQ490533.1 | DQ490536.1 | DQ490537.1 | D10970     | D45244     | DQ490538.1 | DQ490535.1 | D86271.1   | DQ490534.1 |            | AB008656   |
| RVA/Human-tc/THA/Mc323/1989/G9P19         |            |            |            | D38052.1   |            |            |            |            |            |            |            |
| RVA/Human-tc/THA/T152/1998/G12P9          |            |            |            |            |            |            |            |            |            |            | DQ146706.1 |
| RVA/Human-tc/USA/DS-1/1976/G2P1B4         | HQ650116.1 | HQ650117.1 | HQ650118.1 | HQ650119.1 | HQ650120.1 | HQ650121.1 | HQ650122.1 | HQ650124.1 | HQ650123.1 | HQ650125.1 | HQ650126.1 |
| RVA/Human-tc/USA/Wa/1974/G1P1A8           | KT694939.1 | KT694940.1 | KT694941.1 | KT694942.1 | KT694945.1 | KT694943.1 | KT694947.1 | KT694944.1 | KT694946.1 | KT694948.1 | KT694949.1 |
| RVA/Human-tc/USA/WI61/1983/G9P1A8         |            |            |            |            |            |            |            | LC482504.1 |            |            |            |
| RVA/Human-wt/BEL/B4106/2000/G3P14         |            |            |            |            |            |            |            |            |            | AY740732.1 |            |
| RVA/Human-wt/BEL/BEF06018/2014/G29P41     |            |            |            | KU128895.1 |            |            |            |            |            |            |            |
| RVA/Human-wt/BGD/Dhaka6/2001/G11P25       |            |            |            | AY773004.2 |            |            |            |            |            |            |            |
| RVA/Human-wt/BRA/QUI-35-F5/2010/G3P9      |            |            |            |            | KF185099.1 | KF185107.1 |            |            |            |            |            |
| RVA/Human-wt/CHN/E2451/2011/G3P9          | JX946168.1 | JX946169.1 | JX946170.1 | JX946171.1 | JX946174.1 | JX946172.1 | JX946176.1 | JX946173.1 | JX946175.1 | JX946177.1 | JX946178.1 |
| RVA/Human-wt/Ecu/Ecu534/2006/G20P28       |            |            |            | EU805773.1 |            | EU805774.2 |            | EU805775.1 |            |            |            |
| RVA/Human-wt/HUN/Hun5/1997/G6P14          |            |            |            |            | EF554110.1 |            |            |            |            |            |            |
| RVA/Human-wt/NPL/KTM368/2004/G11P25       |            |            |            |            |            | GU199496.1 |            |            |            |            |            |
| RVA/Human-wt/SUR/2014735512/2013/G20P28   | KX257410.1 | KX257409.1 | KX257408.1 | KX257407.1 | KX257415.1 | KX257406.1 | KX257414.1 | KX257413.1 | KX257405.1 | KX257412.1 | KX257411.1 |
| RVA/Human-wt/THA/CMH222/2001/G3P3         |            |            |            | DQ288661.1 |            | DQ288659.1 |            | AY707792.1 |            | DQ288660.1 |            |
| RVA/Human-wt/US/09US7118/2009/G3P24       | KF541281.1 | KF541282.1 | KF541283.1 | KF541284.1 | KF541287.1 | KF541285.1 | KF541288.1 | KF541289.1 | KF541286.1 | KF541290.1 | KF541291.1 |
| RVA/Alpaca/PER/ALRVA-Kayra/3386/2010/G3Px |            |            |            |            |            |            |            | KT250942.1 |            |            |            |
| RVA/Mouse-tc/UK/EHP/1981/G16P20           |            |            |            | U08424.1   |            |            |            |            |            |            |            |
| RVA/Mouse-tc/USA/ETD_822/2007/G16P16      | GQ479947.1 | GQ479948.1 | GQ479949.1 | GQ479950.1 |            |            | GQ479953.1 |            | GQ479954.1 |            | GQ479957.1 |
| RVA/Mouse-tc/USA/EW/XXXX/G16P16           |            |            |            | U08429.1   | U08428.1   | U36474.1   |            | U08430.1   |            | U96335.1   |            |
| RVA/Pheasant-tc/GER/10V0112H5/2010/G23P37 |            |            |            | JX204814.1 |            |            |            |            |            |            |            |
| RVA/Pheasant-wt/HUN/Phea14246/2008/G23Px  |            |            |            |            |            |            |            | FN393054.1 |            |            |            |



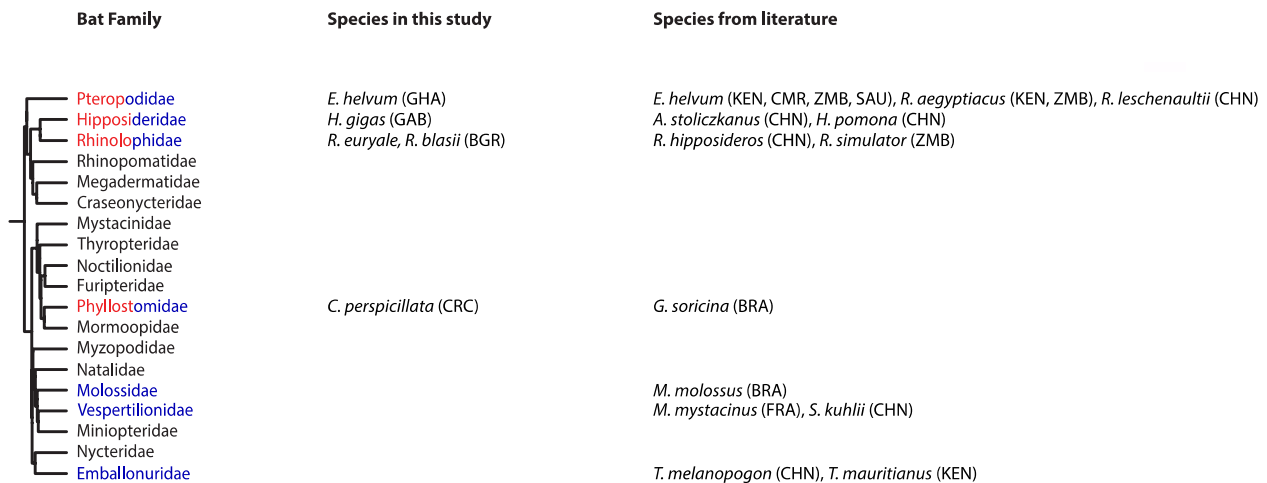

**Figure S1.** RVA-positive bat families and species. The RVA-positive bat families reported in the present study (red) and in literature (blue) are shown on the phylogenetic tree adapted from Simmons et al (2003). No RVA is reported in families in black. A family is accepted positive for the literature group if more than 1 RVA segment was submitted to GenBank. The corresponding bat species and the country of sample collection are also displayed. Country: GHA = Ghana, FRA = France, BRA = Brazil, ZMB = Zambia, SAU = Saudi Arabia, CRC = Costa Rica, KEN = Kenya, CHN = China, BGR = Bulgaria, GAB = Gabon



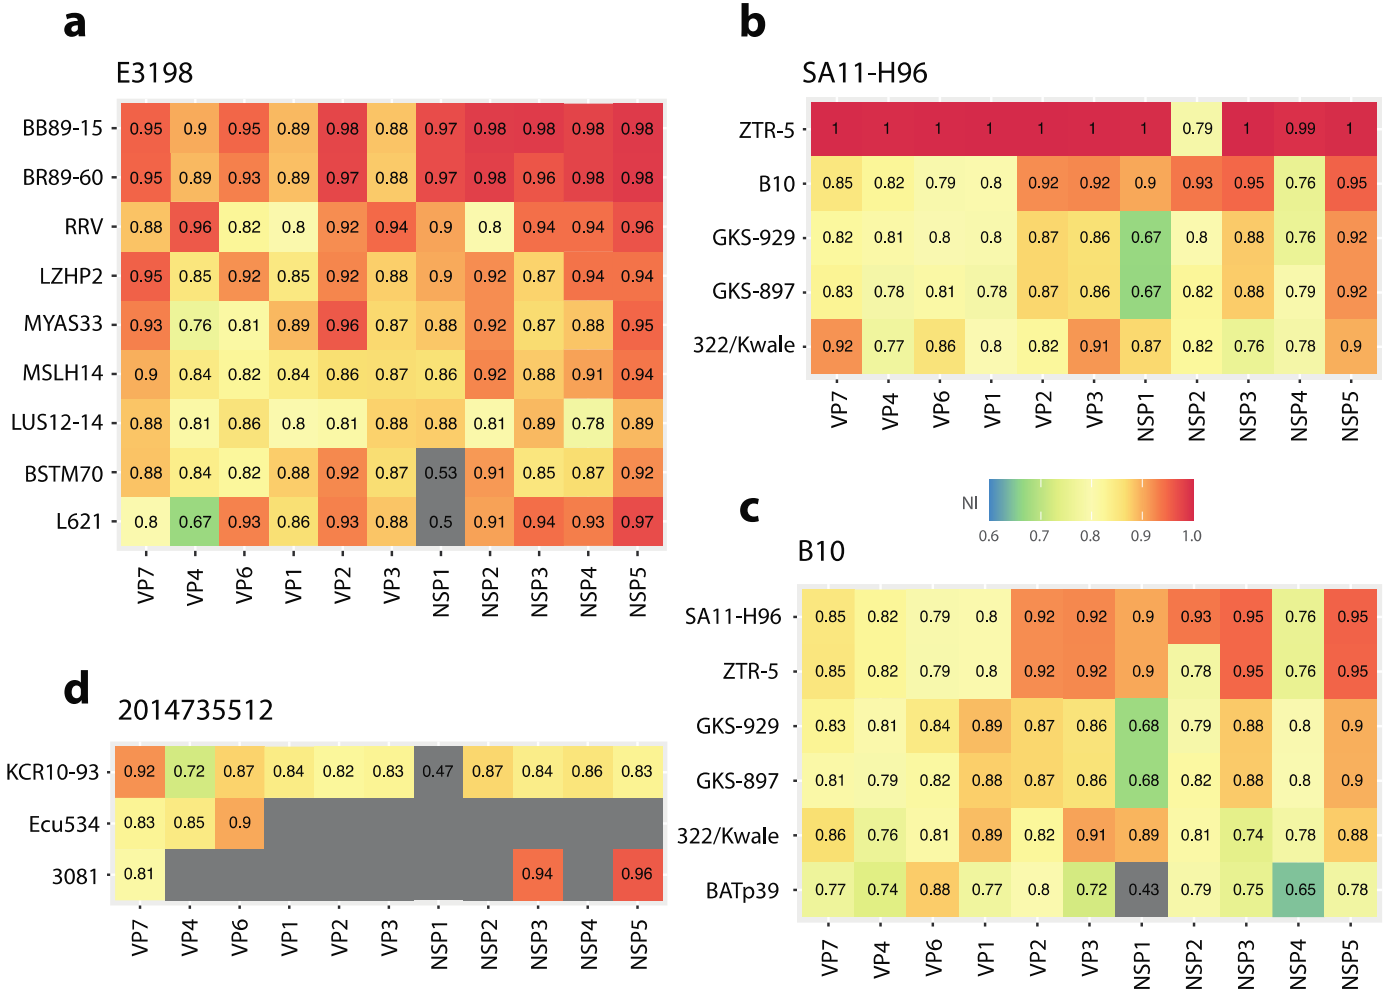

**Figure S2.** Heatmap of pairwise nucleotide identities (NI) of the unusual RVA strains: E3198 (a), SA11-H96 (b), B10 (c), 2014735512 (d). Grey colour indicates the nucleotide identities below 0.6 or lack of sequence information for the compared strain

## Supplementary Material and Methods

### Screening VP1-Consensus-PCR

25- $\mu$ L SuperScript<sup>®</sup> III with Platinum<sup>®</sup> Taq DNA Polymerase One-Step RT-PCR reactions as described by the manufacturer (INVITROGEN, Karlsruhe, Germany) used 800 nM each of 1<sup>st</sup>-round primers, 1  $\mu$ g bovine serum albumin, MgSO<sub>4</sub> up to a total concentration of 2.4 mM, plus 5  $\mu$ L RNA extract. Amplification involved 30 min at 48°C; 3 min at 95°C; 10 cycles of 20 s at 95°C, 20 s starting at 60°C with a decrease of 1°C per cycle, and 35 s at 72°C; 40 cycles of 20 s at 95°C, 20 s at 50°C, and 35 s at 72°C; and a final elongation step of 2 min at 72°C. 50- $\mu$ L Platinum Taq reactions as described by the manufacturer (INVITROGEN, Karlsruhe, Germany) used 2  $\mu$ L of 1st-round PCR product, 2 mM MgCl<sub>2</sub> and 800 nM of 2<sup>nd</sup>-round forward primer and 400 nM of the reverse primer. Amplification involved 3 min at 95°C; 10 cycles of 15 s at 95°C, 15 s starting at 62°C with a decrease of 1°C per cycle, and 30 s at 72°C; 40 cycles 15s at 95°C, 15 s at 52°C and 30 s at 72°C; and a final elongation step of 2 min at 72°C. All PCR reactions were carried out in an Eppendorf Mastercycler ep gradient S (Eppendorf AG, Hamburg, Germany).
